# Supplementary material for: Global Incidence and Mortality of Gastric Cancer, 1980-2018
Source: PubMed Central journal article supplement (PMC8314143; doi:10.1001/jamanetworkopen.2021.18457), 2021-07-26

## Supplementary Online Content

Wong MCS, Huang J, Chan PSF, et al. Global incidence and mortality from gastric cancer, 1980-2018. *JAMA Netw Open*. 2021;4(7):e2118457. doi:10.1001/jamanetworkopen.2021.18457

**eTable 1.** Data Source for the Age-Standardized Incidence/Mortality Rates

**eTable 2.** The Incidence/Mortality of Gastric Cancer Worldwide and by Region

**eFigure 1.** The Plots of Incidence and Mortality Trends for Each Country

**eFigure 2.** The Graphs of the Joinpoint Regression Output

**This supplementary material has been provided by the authors to give readers additional information about their work.**

**eTable 1:** Data source for the age-standardized incidence and mortality rates of gastric cancer

|                       | <b>Incidence</b>              | <b>Mortality</b>    |
|-----------------------|-------------------------------|---------------------|
| Australia             | CI5 (1993-2012)               | WHO (1979-2015)     |
| Austria               | CI5 (1998-2012)               | WHO (1980-2016)     |
| Bahrain               | CI5 (1998-2012)               | WHO (1985-2014)     |
| Belarus               | CI5 (1983-2012)               | WHO (1981-2014)     |
| Belgium               | n/a                           | WHO(1979-2015)      |
| Brazil                | CI5 (1993-2012) <sup>1</sup>  | WHO (1979-2015)     |
| Bulgaria              | CI5 (1998-2012)               | WHO (1980-2014)     |
| Canada                | CI5 (1983-2012) <sup>2</sup>  | WHO (1979-2013)     |
| Chile                 | CI5 (1998-2012) <sup>3</sup>  | WHO (1980-2015)     |
| China                 | CI5 (1998-2012) <sup>4</sup>  | n/a                 |
| Colombia              | CI5 (1983-2012) <sup>5</sup>  | WHO (1984-2015)     |
| Costa Rica            | CI5 (1982-2011)               | WHO (1980-2014)     |
| Croatia               | CI5 (1988-2012)               | WHO (1985-2016)     |
| Cyprus                | CI5 (1998-2012)               | WHO (1999-2016)     |
| Czech Republic        | CI5 (1983-2012)               | WHO (1986-2016)     |
| Denmark               | NORDCAN (1943-2016)           | NORDCAN (1951-2016) |
| Ecuador               | CI5 (1985-2012) <sup>6</sup>  | WHO (1979-2015)     |
| Estonia               | CI5 (1983-2012)               | WHO (1981-2015)     |
| Faroe Islands         | NORDCAN (1983-2013)           | NORDCAN (1960-2015) |
| Finland               | NORDCAN (1953-2016)           | NORDCAN (1953-2016) |
| France                | CI5 (1998-2012) <sup>7</sup>  | WHO (1979-2014)     |
| Germany               | CI5 (1998-2012) <sup>8</sup>  | WHO (1990-2015)     |
| Greenland             | NORDCAN (1968-2016)           | NORDCAN (1983-2016) |
| Hong Kong, SAR, China | CI5 (1983-2012)               | WHO (1979-2015)     |
| Iceland               | NORDCAN (1951-2016)           | NORDCAN (1955-2016) |
| India                 | CI5(1983-2012) <sup>9</sup>   | n/a                 |
| Ireland               | CI5 (1994-2012)               | WHO (1979-2014)     |
| Israel                | CI5 (1963-2012)               | WHO (1979-2015)     |
| Italy                 | CI5 (1998-2010) <sup>10</sup> | WHO (1979-2015)     |
| Japan                 | CI5 (1998-2010) <sup>11</sup> | WHO (1979-2015)     |

|                    |                               |                               |
|--------------------|-------------------------------|-------------------------------|
| Korea              | CI5 (1999-2012) <sup>12</sup> | WHO (1985-2016) <sup>13</sup> |
| Kuwait             | CI5 (1998-2012)               | WHO (1979-2014)               |
| Latvia             | n/a                           | WHO (1980-2015)               |
| Lithuania          | CI5 (1988-2012)               | WHO (1981-2016)               |
| Malta              | CI5 (1993-2012)               | WHO(1979-2015)                |
| Netherlands        | CI5 (1989-2012)               | WHO (1979-2016)               |
| New Zealand        | CI5 (1983-2012)               | WHO (1979-2013)               |
| Norway             | NORDCAN (1953-2012)           | NORDCAN (1953-2016)           |
| Philippines        | CI5 (1983-2012) <sup>14</sup> | WHO (1992-2011)               |
| Poland             | CI5 (1998-2012) <sup>15</sup> | WHO (1980-2015)               |
| Portugal           | n/a                           | WHO (1980-2014)               |
| Russian Federation | n/a                           | WHO (1980-2015)               |
| Singapore          | n/a                           | WHO (1979-2015)               |
| Slovakia           | CI5 (1971-2010)               | WHO (1992-2014)               |
| Slovenia           | CI5 (1983-2012)               | WHO (1985-2015)               |
| Spain              | CI5 (1993-2010) <sup>16</sup> | WHO (1980-2015)               |
| Sweden             | NORDCAN (1960-2016)           | NORDCAN (1952-2016)           |
| Switzerland        | CI5 (1998-2012) <sup>17</sup> | WHO (1995-2015)               |
| Thailand           | CI5 (1993-2012) <sup>18</sup> | WHO (1979-2016)               |
| Turkey             | CI5 (1998-2012) <sup>19</sup> | WHO (2009-2015)               |
| Uganda             | CI5 (1993-2012) <sup>20</sup> | n/a                           |
| United Kingdom     | CI5 (1995-2012) <sup>21</sup> | WHO (1979-2015)               |
| USA                | SEER(1975-2016) <sup>22</sup> | SEER(1968-2017) <sup>22</sup> |
| USA Black          | SEER(1975-2016) <sup>22</sup> | SEER(1968-2017) <sup>22</sup> |
| USA White          | SEER(1975-2016) <sup>22</sup> | SEER(1968-2017) <sup>22</sup> |

n/a” not available; CI5: Cancer Incidence in Five Continents V; NORDCAN: Nordic Cancer Registries’ SEER: USA: National Institutes of Health (NIH); WHO: World Health Organization

1. Brazil, Goiania
2. Canada (excl. Nunavut, Quebec and Yukon)
3. Chile, Valdivia
4. China (5 registries)
5. Colombia, Cali

6. Ecuador, Quito
7. France (9 registries)
8. Germany (2 registries)
9. India, Chennai
10. Italy (8 registries)
11. Japan (4 registries)
12. Korea (5 registries)
13. Republic of Korea
14. Philippines, Manila
15. Poland, Kielce
16. Spain (9 registries)
17. Switzerland (6 registries)
18. Thailand (4 registries)
19. Turkey (2 registries)
20. Uganda, Kampala
21. UK, England
22. USA, ( 9 registries)

**Reference:**

- a. CI5: [http://ci5.iarc.fr/CI5plus/Pages/table1\\_sel.aspx](http://ci5.iarc.fr/CI5plus/Pages/table1_sel.aspx)
- b. NORDCAN: <http://www-dep.iarc.fr/NORDCAN/english/frame.asp>
- c. SEER: <http://seer.cancer.gov/data/seerstat/>
- d. WHO: <http://apps.who.int/healthinfo/statistics/mortality/whodpms/>

eTable 2:

The incidence of mortality of gastric cancer worldwide and by region

|                            | Incidence  |                    |           |                    |           |                    | Mortality  |                    |         |                    |         |                    |
|----------------------------|------------|--------------------|-----------|--------------------|-----------|--------------------|------------|--------------------|---------|--------------------|---------|--------------------|
|                            | Both sexes |                    | Males     |                    | Females   |                    | Both sexes |                    | Males   |                    | Females |                    |
|                            | New cases  | Cum. risk 0-74 (%) | New cases | Cum. risk 0-74 (%) | New cases | Cum. risk 0-74 (%) | Deaths     | Cum. risk 0-74 (%) | Deaths  | Cum. risk 0-74 (%) | Deaths  | Cum. risk 0-74 (%) |
| Eastern Africa             | 9,215      | 0.5                | 4,572     | 0.53               | 4,643     | 0.47               | 8,908      | 0.49               | 4,404   | 0.53               | 4,504   | 0.47               |
| Middle Africa              | 4,143      | 0.51               | 2,213     | 0.6                | 1,930     | 0.44               | 3,765      | 0.5                | 1,996   | 0.58               | 1,769   | 0.44               |
| Northern Africa            | 7,702      | 0.45               | 4,518     | 0.56               | 3,184     | 0.34               | 6,727      | 0.38               | 4,066   | 0.48               | 2,661   | 0.28               |
| Southern Africa            | 2,008      | 0.42               | 1,176     | 0.6                | 832       | 0.29               | 1,636      | 0.34               | 965     | 0.48               | 671     | 0.23               |
| Western Africa             | 8,080      | 0.48               | 4,546     | 0.56               | 3,534     | 0.41               | 7,671      | 0.46               | 4,214   | 0.53               | 3,457   | 0.4                |
| Caribbean                  | 4,125      | 0.75               | 2,406     | 0.98               | 1,719     | 0.54               | 3,203      | 0.53               | 1,907   | 0.72               | 1,296   | 0.36               |
| Central America            | 12,881     | 0.81               | 6,756     | 0.93               | 6,125     | 0.7                | 10,439     | 0.63               | 5,544   | 0.73               | 4,895   | 0.53               |
| South America              | 50,052     | 1.06               | 29,720    | 1.46               | 20,332    | 0.73               | 38,272     | 0.78               | 23,323  | 1.1                | 14,949  | 0.51               |
| North America              | 29,275     | 0.48               | 18,488    | 0.65               | 10,787    | 0.31               | 13,403     | 0.19               | 8,021   | 0.26               | 5,382   | 0.13               |
| Eastern Asia               | 619,226    | 2.64               | 428,298   | 3.79               | 190,928   | 1.5                | 453,513    | 1.84               | 311,227 | 2.65               | 142,286 | 1.04               |
| South-Eastern Asia         | 38,028     | 0.64               | 23,513    | 0.87               | 14,515    | 0.45               | 32,033     | 0.53               | 19,572  | 0.71               | 12,461  | 0.37               |
| South-Central Asia         | 92,819     | 0.62               | 61,536    | 0.84               | 31,283    | 0.4                | 81,837     | 0.55               | 54,422  | 0.75               | 27,415  | 0.35               |
| Western Asia               | 19,655     | 0.98               | 12,230    | 1.31               | 7,425     | 0.68               | 16,992     | 0.84               | 10,725  | 1.15               | 6,267   | 0.56               |
| Central and Eastern Europe | 64,482     | 1.41               | 38,427    | 2.13               | 26,055    | 0.89               | 53,268     | 1.1                | 31,836  | 1.72               | 21,432  | 0.67               |
| Western Europe             | 27,596     | 0.67               | 17,795    | 0.93               | 9,801     | 0.41               | 18,425     | 0.36               | 11,421  | 0.5                | 7,004   | 0.22               |
| Southern Europe            | 29,811     | 0.87               | 18,276    | 1.22               | 11,535    | 0.55               | 22,460     | 0.55               | 13,629  | 0.79               | 8,831   | 0.34               |
| Northern Europe            | 11,244     | 0.51               | 7,113     | 0.68               | 4,131     | 0.34               | 8,014      | 0.31               | 4,994   | 0.43               | 3,020   | 0.2                |
| Australia and New Zealand  | 2,702      | 0.53               | 1,796     | 0.74               | 906       | 0.32               | 1,517      | 0.26               | 959     | 0.35               | 558     | 0.17               |
| Melanesia                  | 583        | 0.89               | 327       | 1.17               | 256       | 0.66               | 532        | 0.84               | 293     | 1.1                | 239     | 0.62               |
| Polynesia                  | 43         | 0.83               | 28        | 1.07               | 15        | 0.61               | 53         | 0.86               | 28      | 0.92               | 25      | 0.8                |
| Micronesia                 | 31         | 0.69               | 20        | 0.93               | 11        | 0.47               | 17         | 0.21               | 9       | 0.1                | 8       | 0.33               |
| Low HDI                    | 22,717     | 0.49               | 12,486    | 0.57               | 10,231    | 0.41               | 21,568     | 0.48               | 11,688  | 0.55               | 9,880   | 0.41               |
| Medium HDI                 | 125,631    | 0.6                | 80,479    | 0.81               | 45,152    | 0.4                | 110,362    | 0.52               | 70,872  | 0.71               | 39,490  | 0.35               |
| High HDI                   | 568,166    | 1.97               | 386,728   | 2.82               | 181,438   | 1.16               | 479,659    | 1.61               | 325,453 | 2.32               | 154,206 | 0.94               |
| Very high HDI              | 316,953    | 1.23               | 203,918   | 1.78               | 113,035   | 0.73               | 170,920    | 0.55               | 105,437 | 0.79               | 65,483  | 0.33               |
| World                      | 1,033,701  | 1.31               | 683,754   | 1.87               | 349,947   | 0.79               | 782,685    | 0.95               | 513,555 | 1.36               | 269,130 | 0.57               |

Data source: GLOBOCAN 2018 Graph production: IARC (<http://gco.iarc.fr/today>) World Health Organization

**eFigure 1:** The plots of incidence and mortality trends for each country

male

Asia

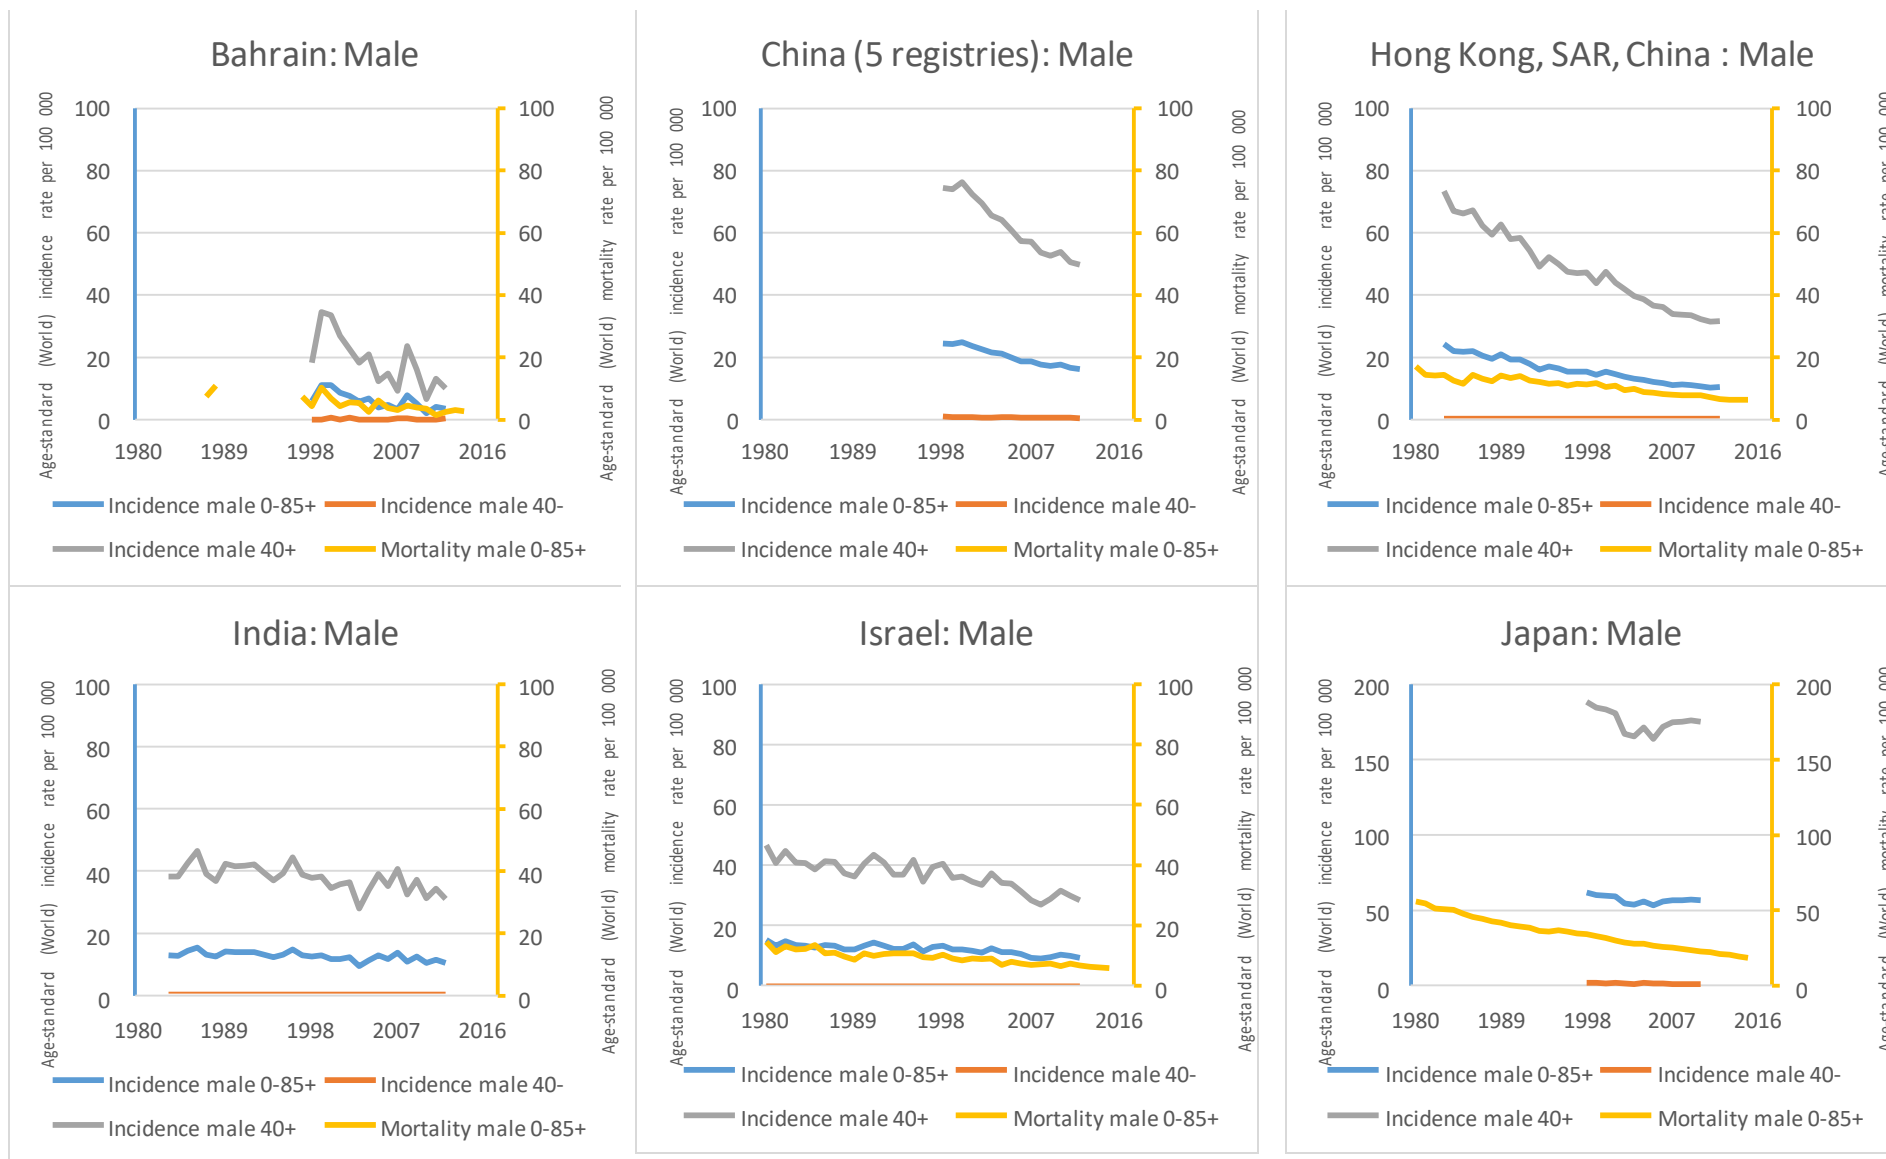

### Korea: Male

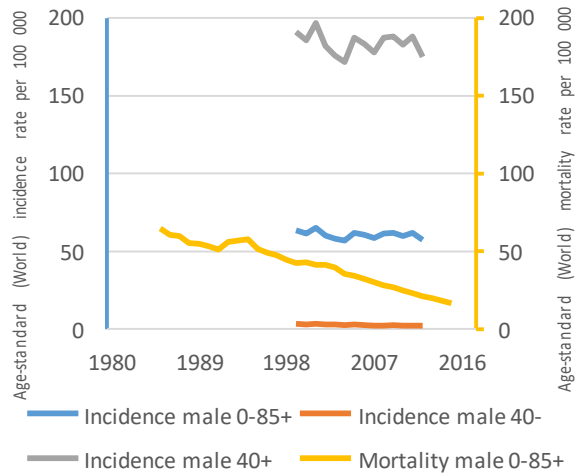

### Kuwait: Male

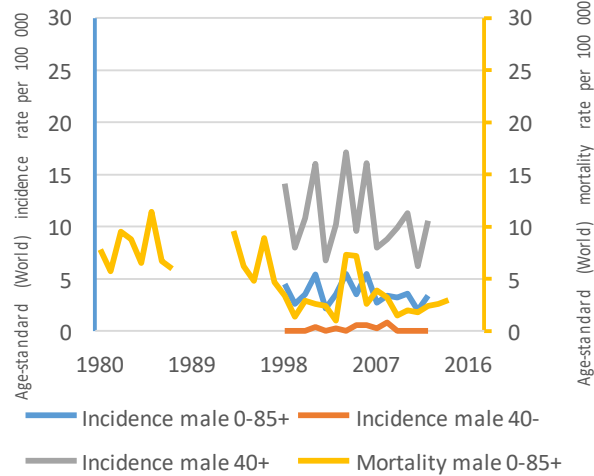

### Philippines: Male

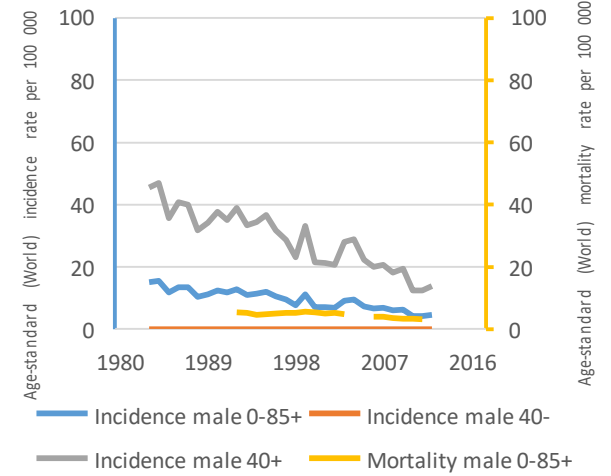

### Singapore: Male

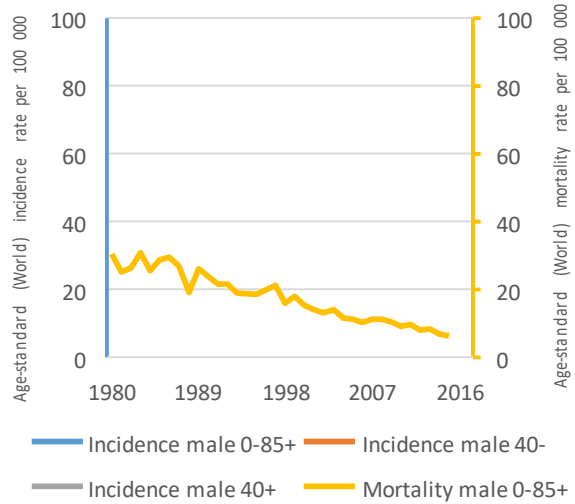

### Thailand: Male

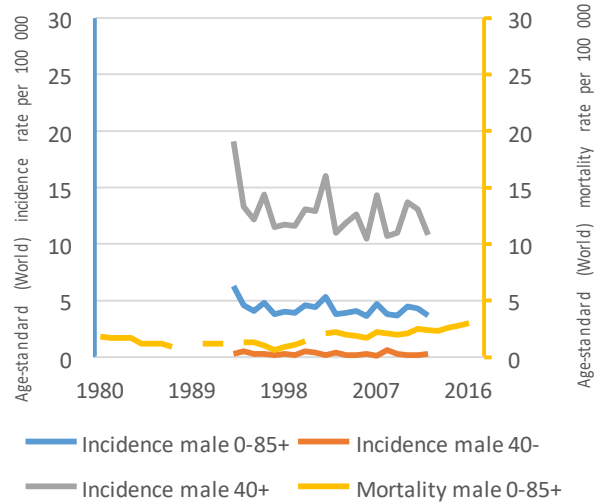



## Oceania

### Australia : Male

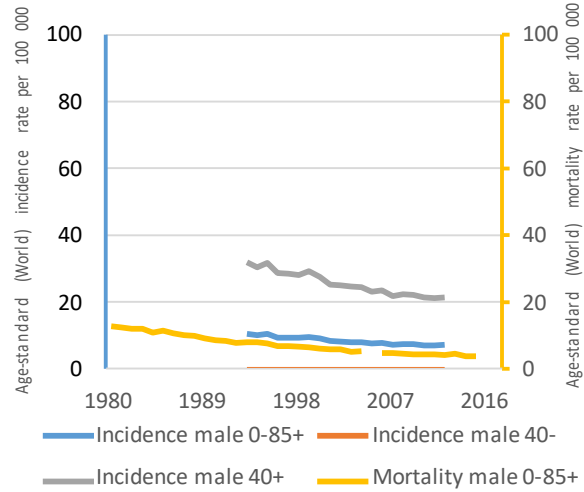

### New Zealand: Male

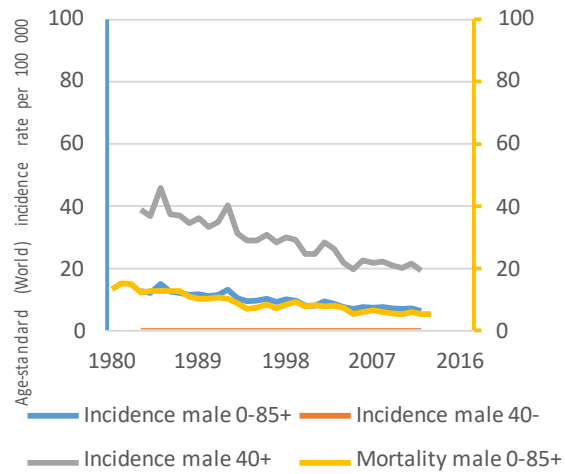

## Northern America

### Canada: Male

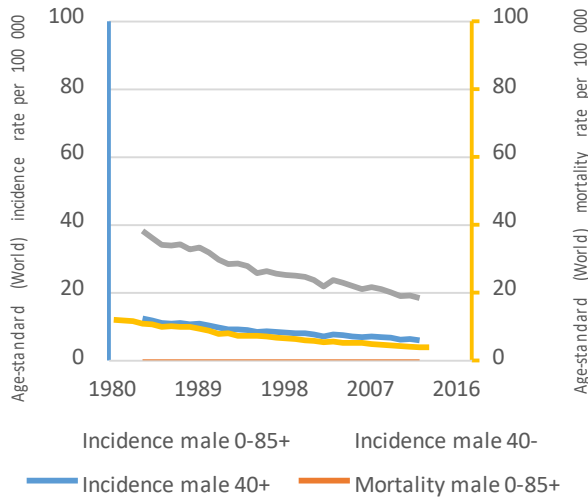

### USA: Male

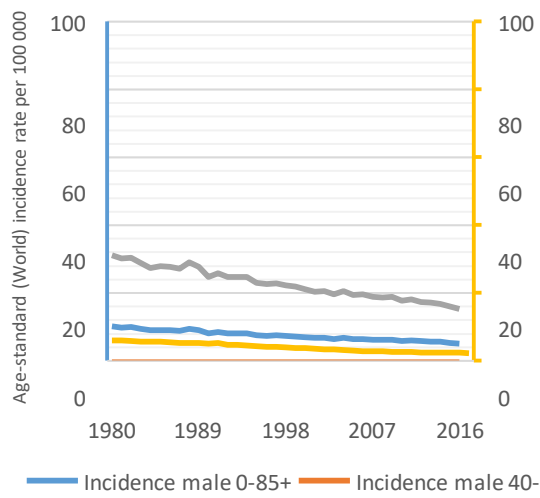

### USA Black: Male

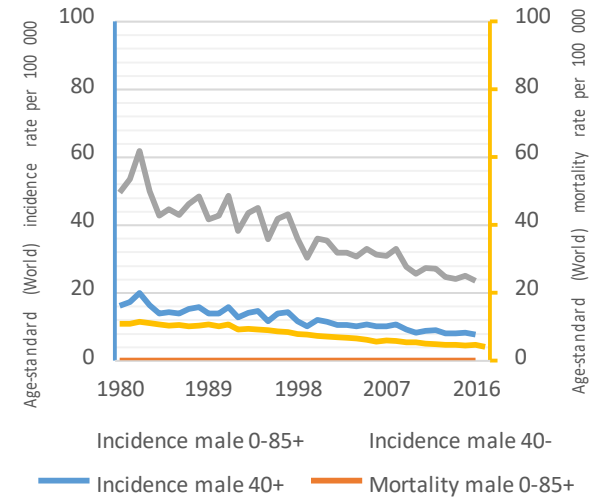

Incidence male 40+

Mortality male 0-85+

### USA White: Male

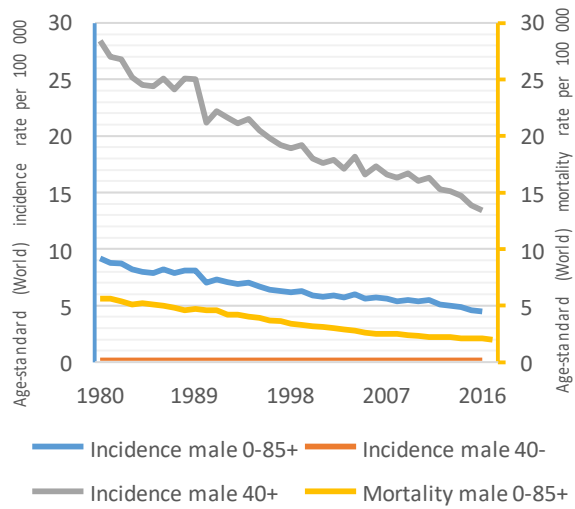

### Southern America

#### Brazil: Male

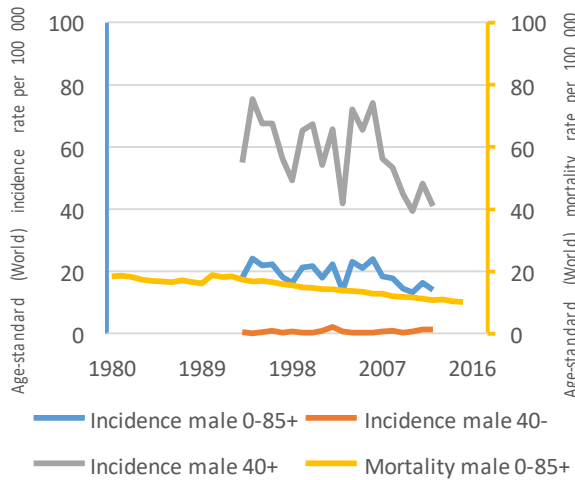

#### Chile: Male

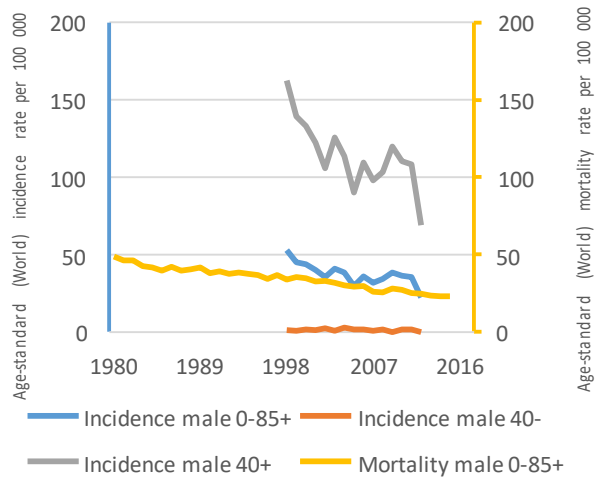

#### Colombia: Male

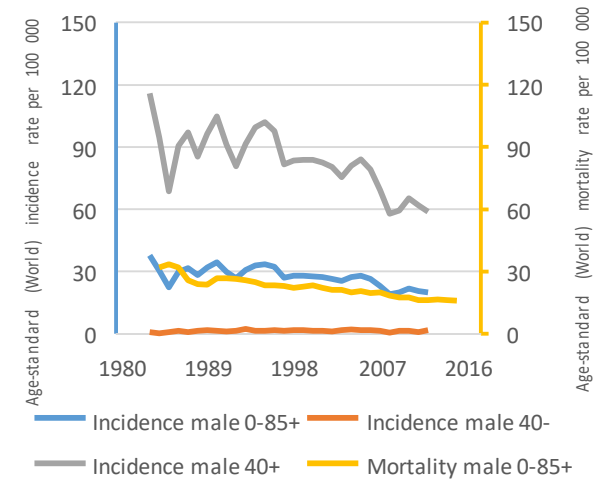

### Costa Rica: Male

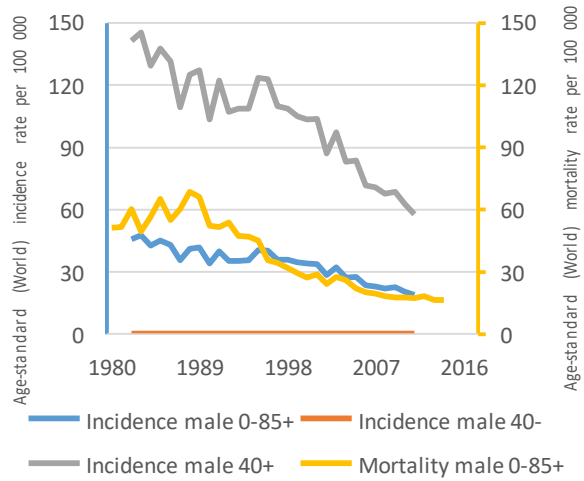

### Ecuador: Male

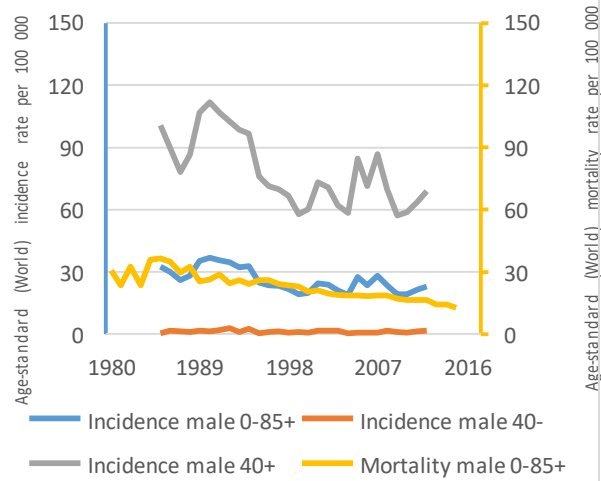

### Denmark: Male

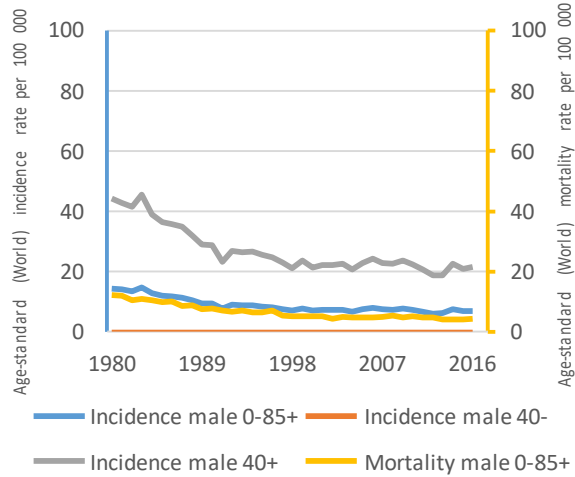

### Northern Europe

### Estonia: Male

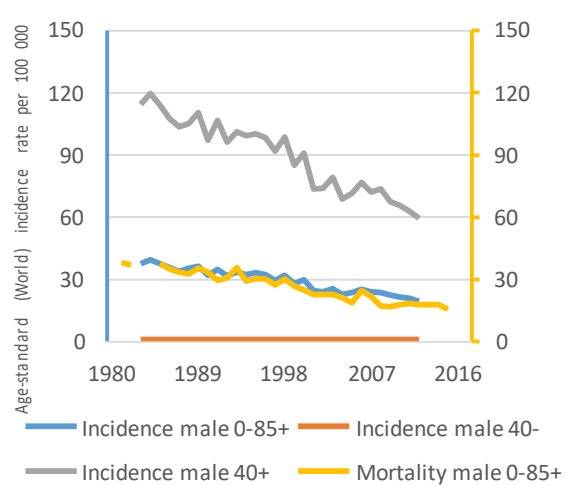

### Faroe Islands: Male

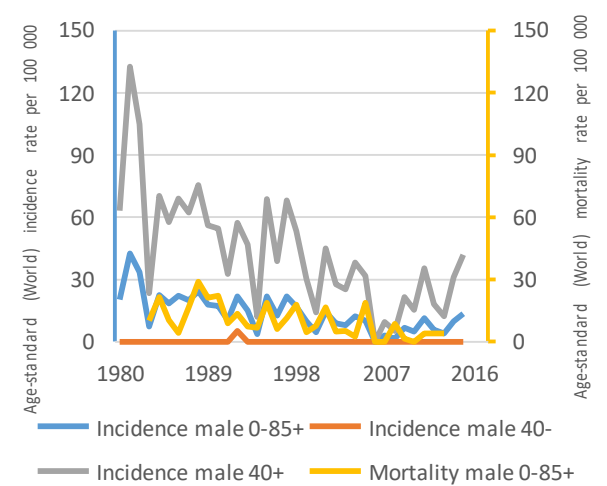

### Finland: Male

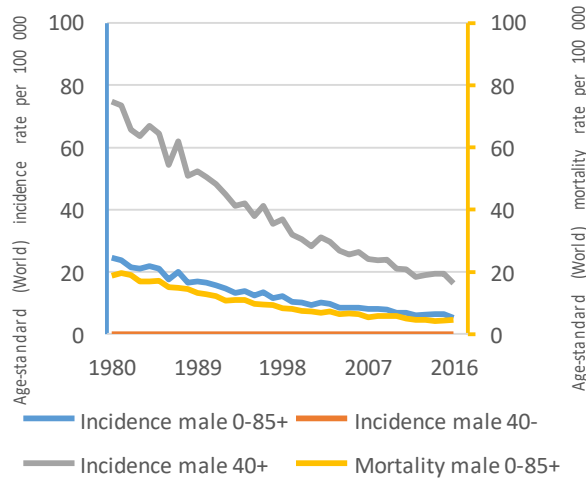

### Greenland: Male

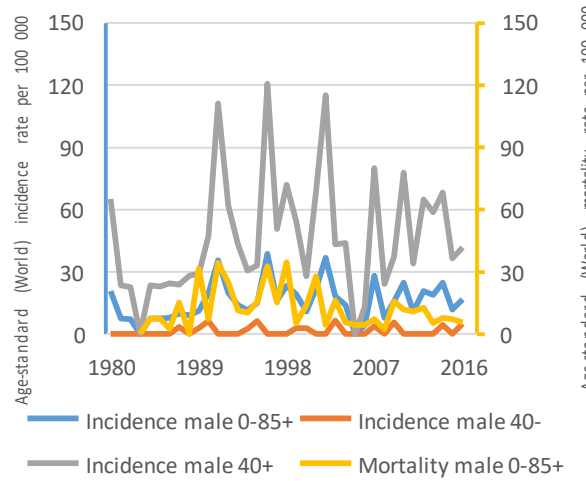

### Iceland: Male

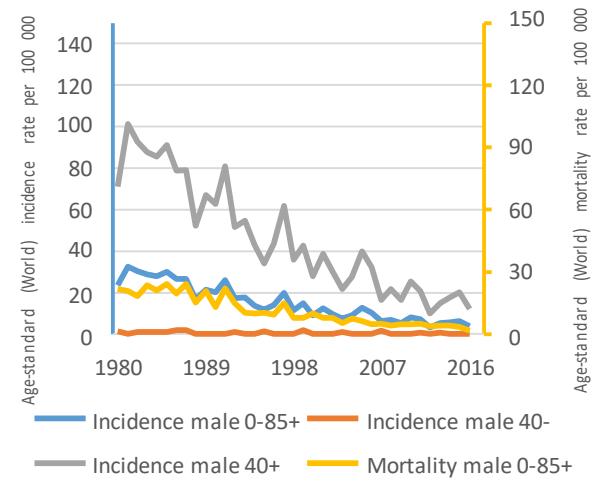

### Ireland: Male

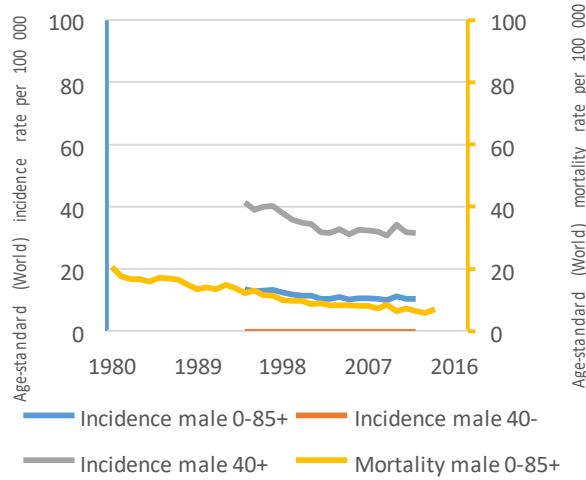

### Latvia: Male

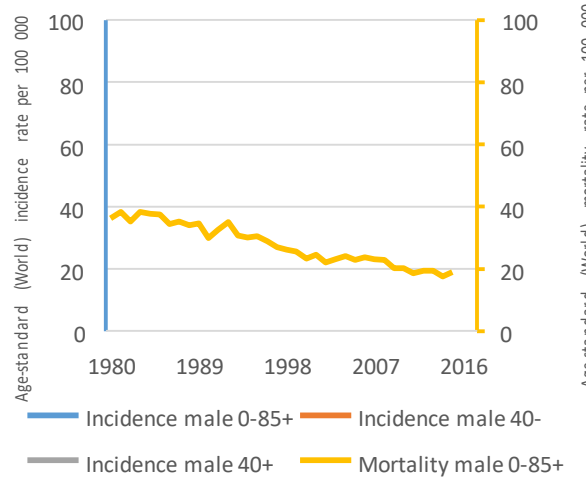

### Lithuania: Male

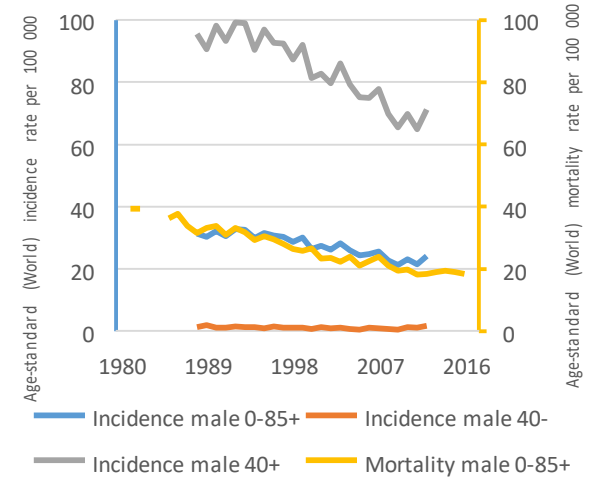

### Norway: Male

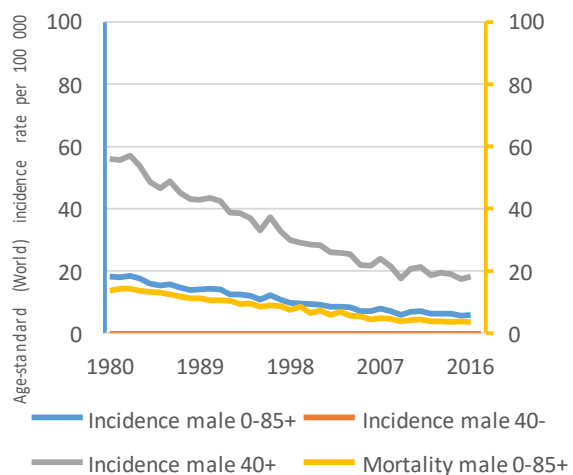

### Sweden: Male

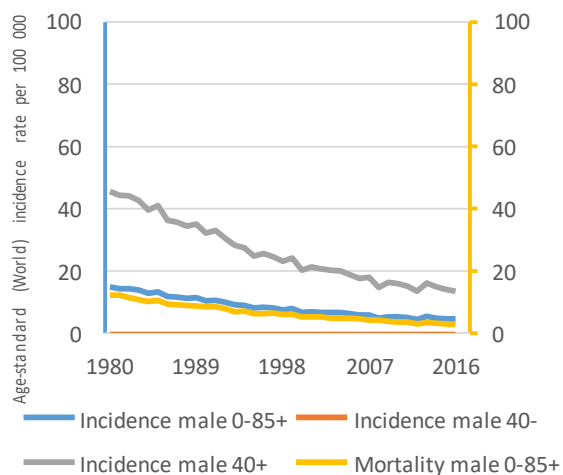

### United Kingdom: Male

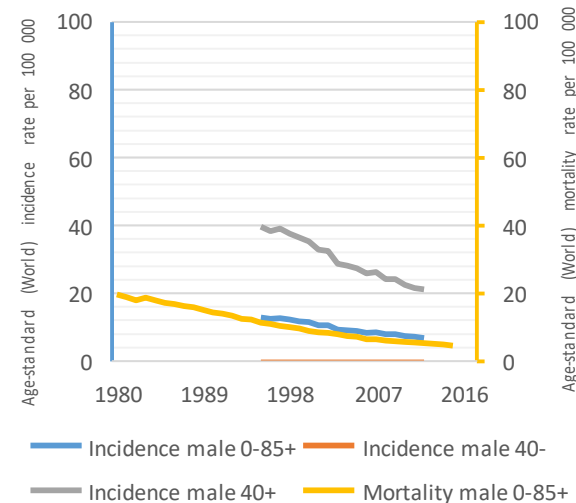

## Western Europe

### Austria : Male

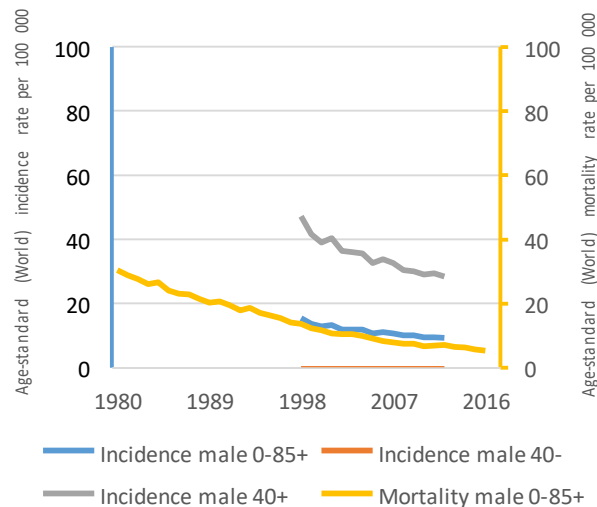

### Belarus: Male

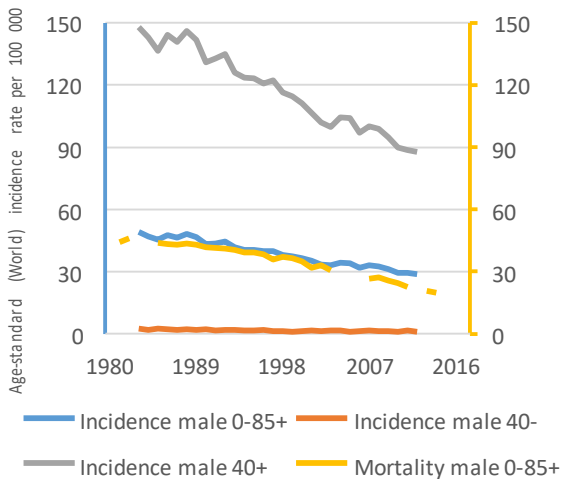

### Belgium: Male

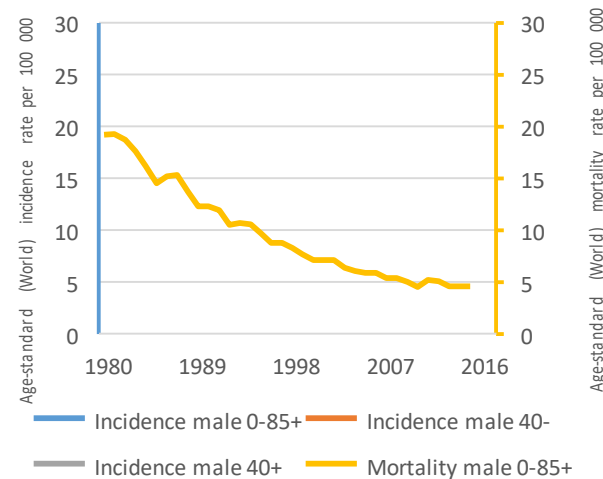

### France: Male

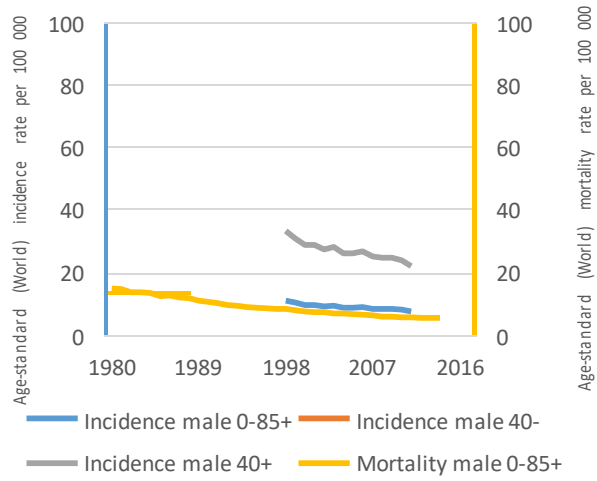

### Germany: Male

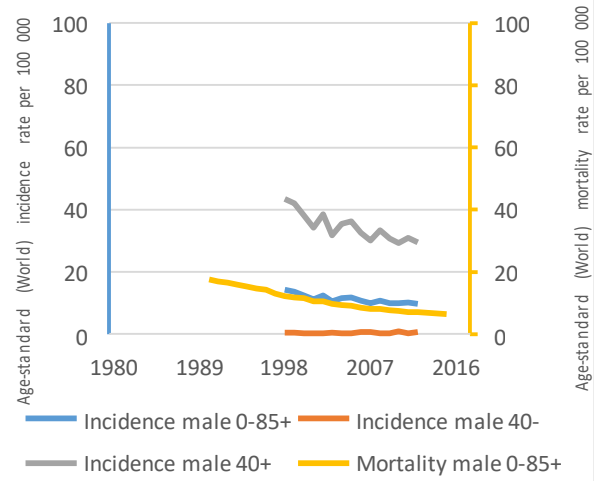

### Netherlands: Male

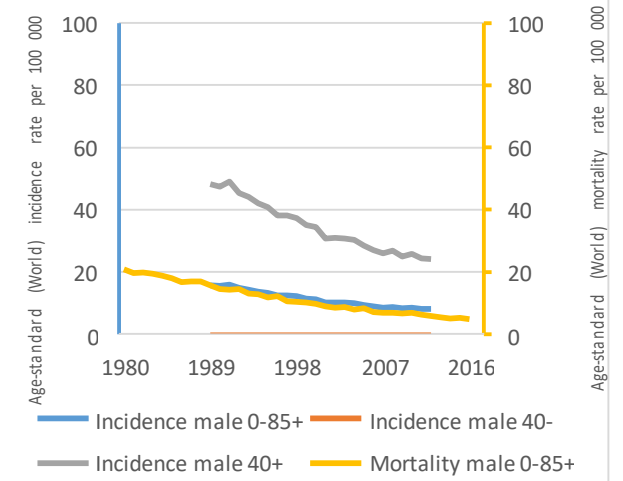

### Switzerland: Male

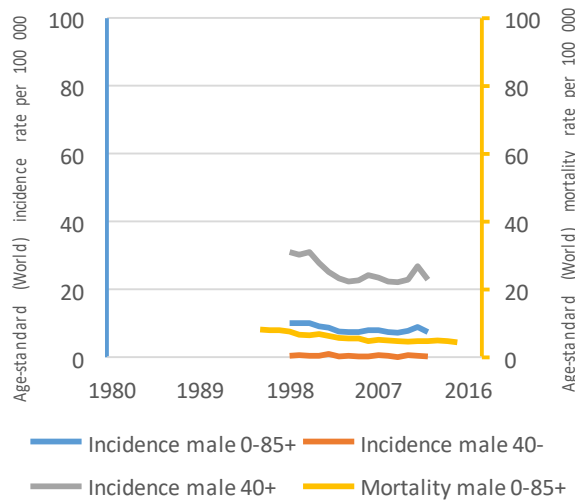

## Southern Europe

### Bulgaria: Male

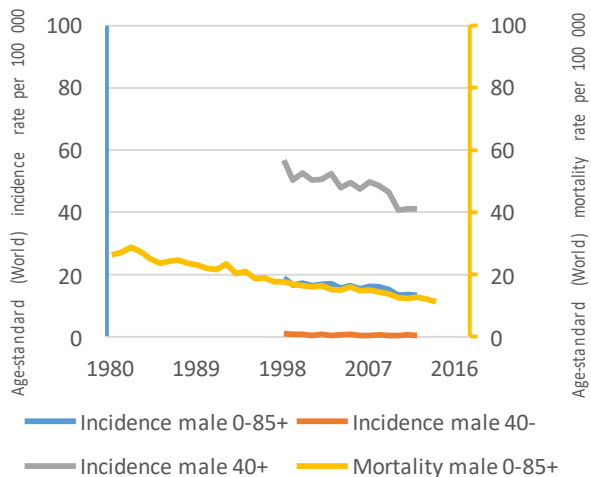

### Croatia: Male

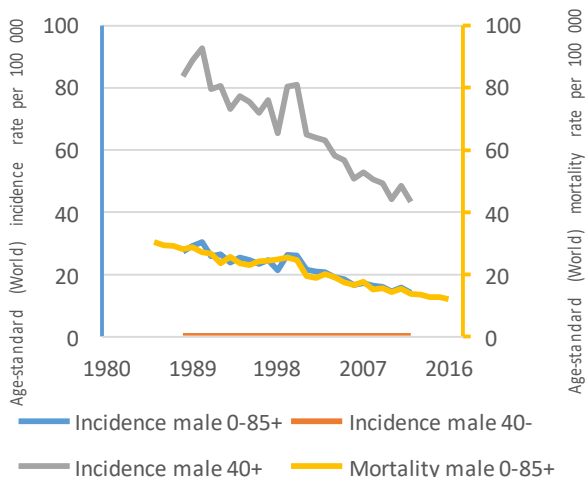

### Cyprus: Male

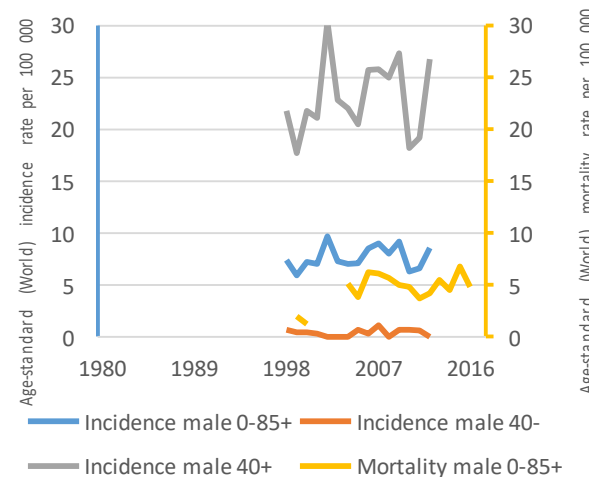

### Italy: Male

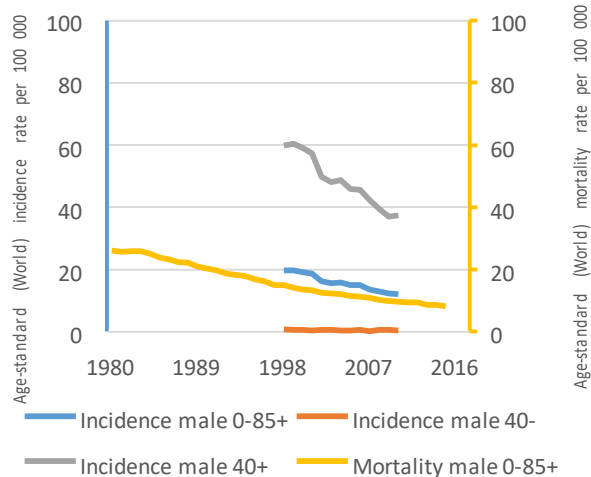

### Malta: Male

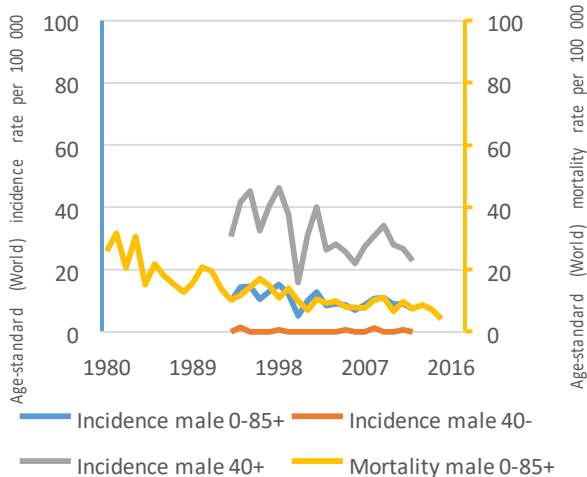

### Portugal: Male

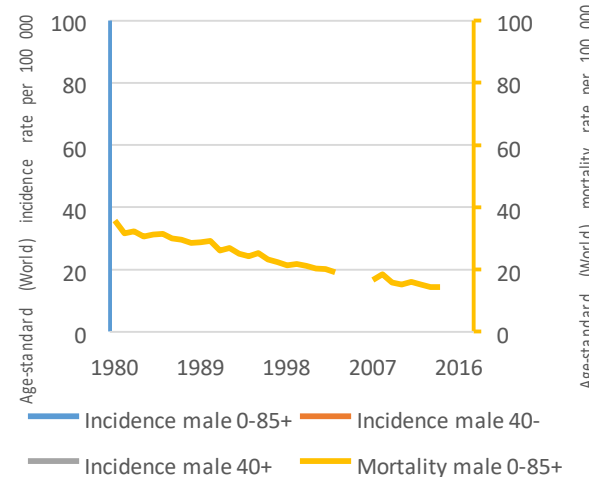



### Slovenia: Male

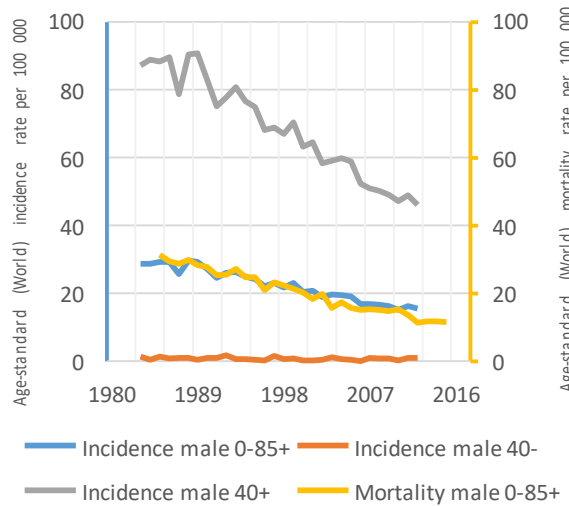

### Spain: Male

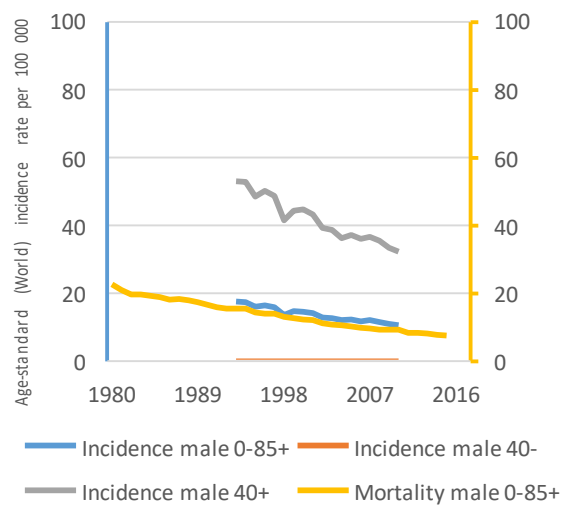

### Turkey: Male

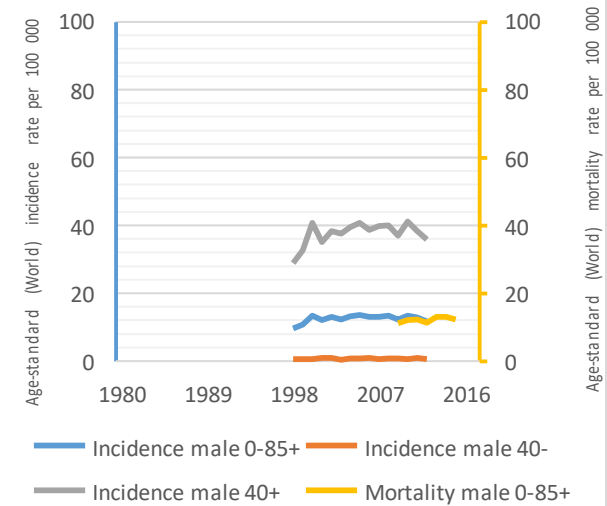

## Eastern Europe

### Czech Republic: Male

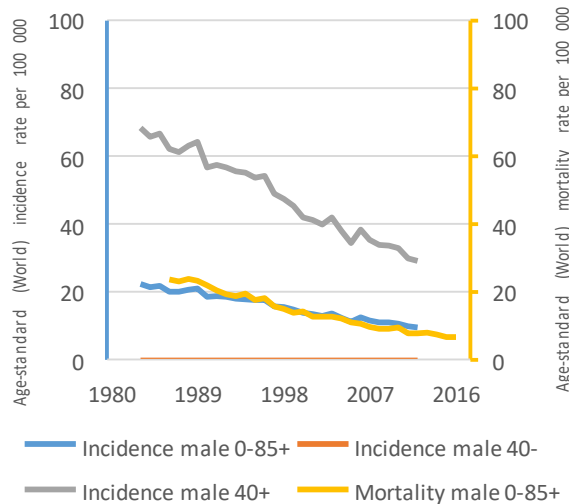

### Poland: Male

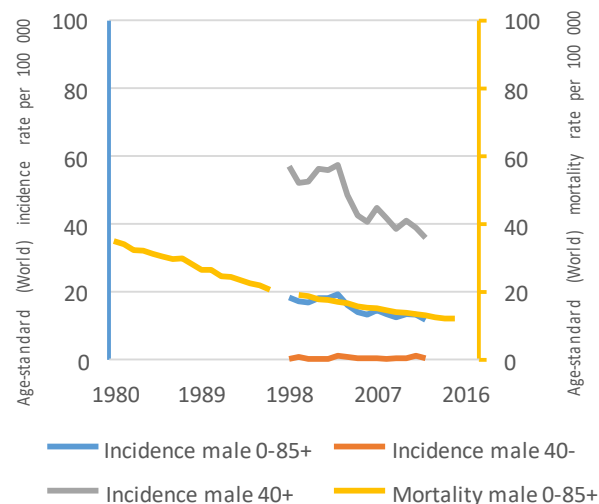

### Slovakia: Male

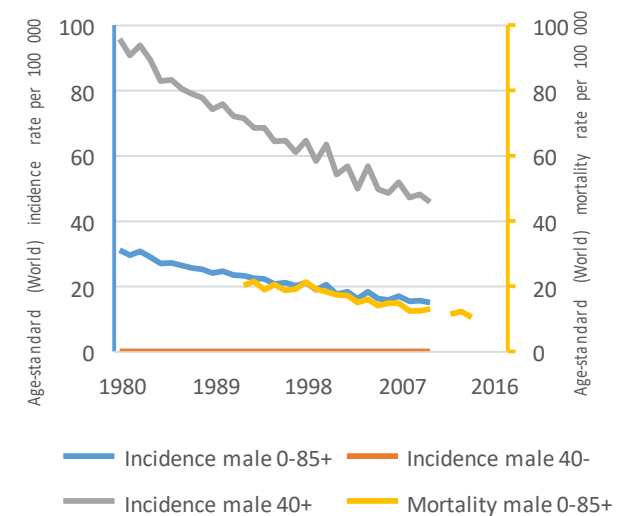

### Russian Federation: Male

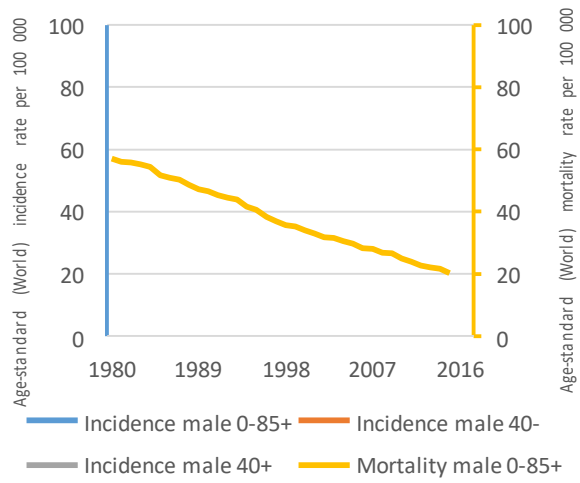

## Africa

### Uganda: Male

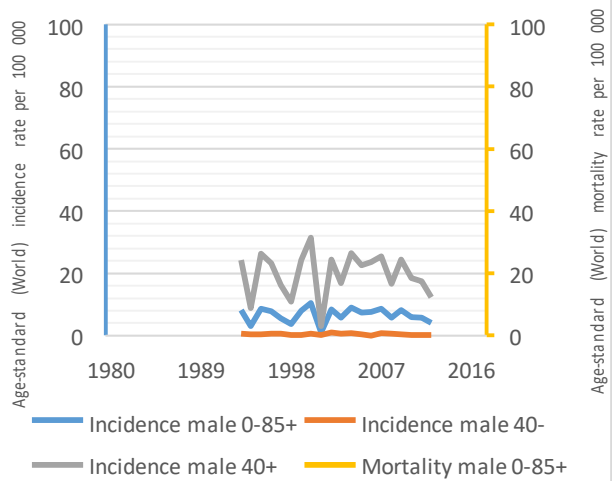

## female

## Asia

### Bahrain: Female

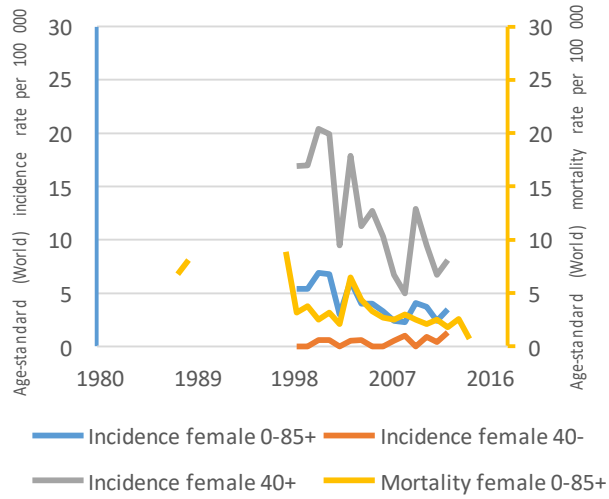

### China (5 registries): Female

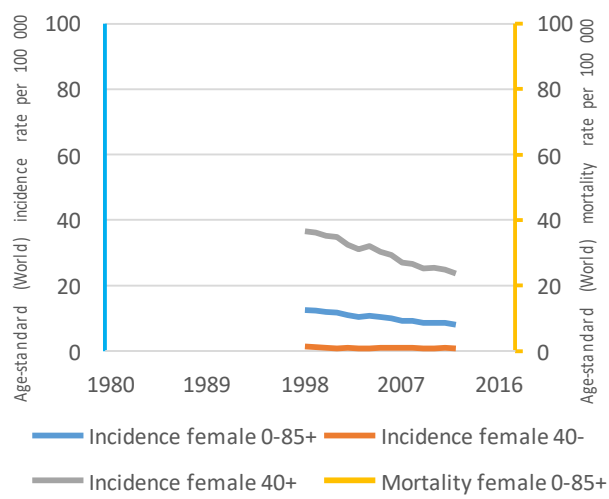

### Hong Kong, SAR, China : Female

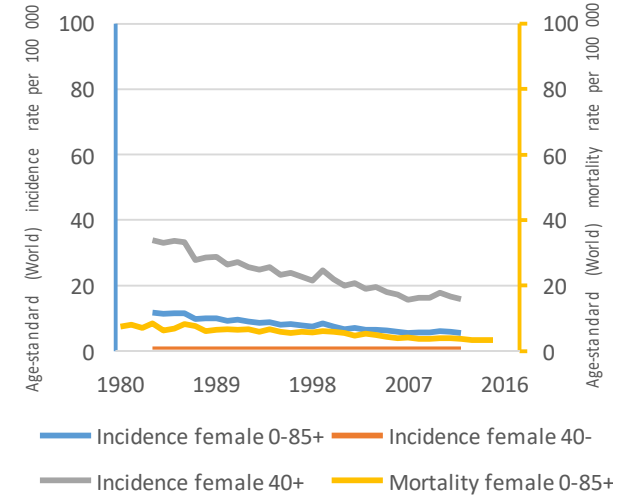

### India: Female

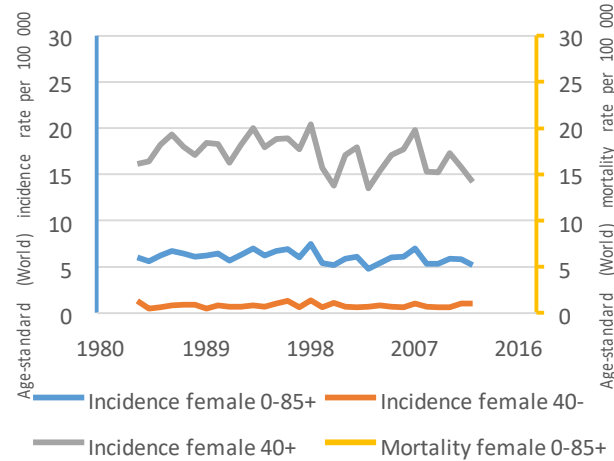

### Israel: Female

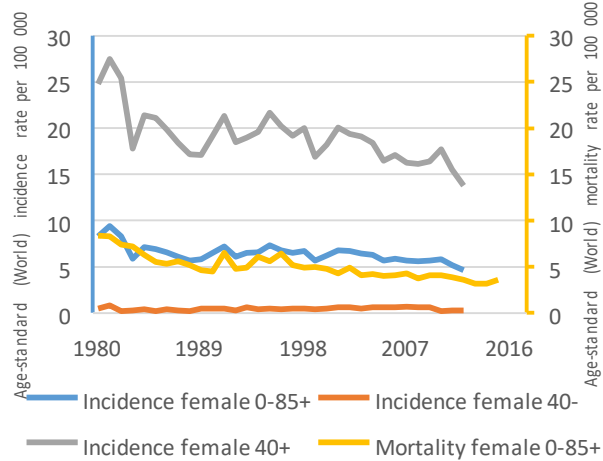

### Japan: Female

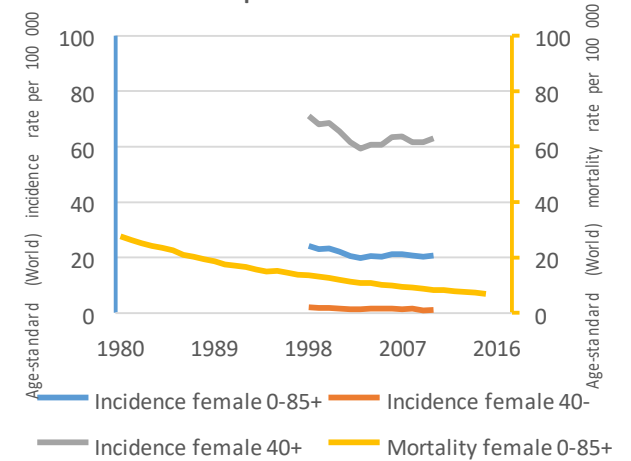

Korea: Female

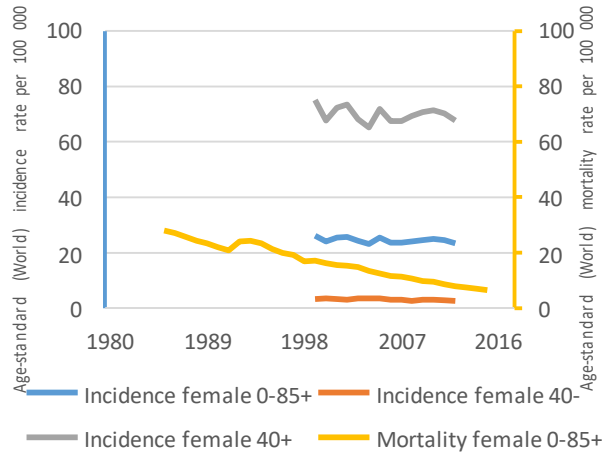

Kuwait: Female

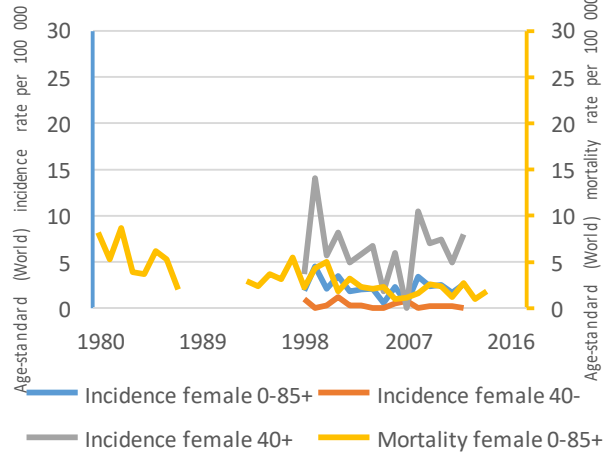

Philippines: Female

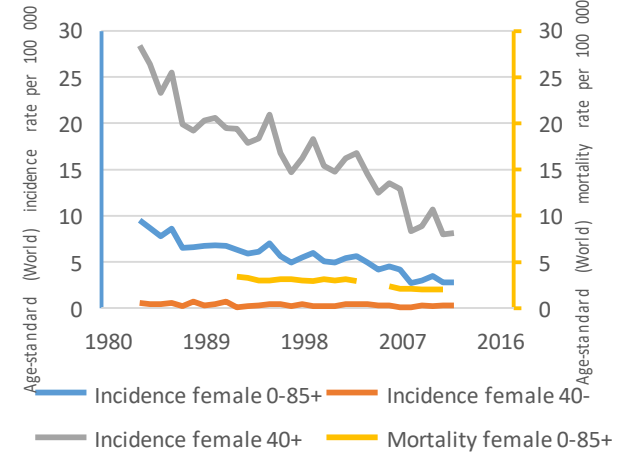

Singapore: Female

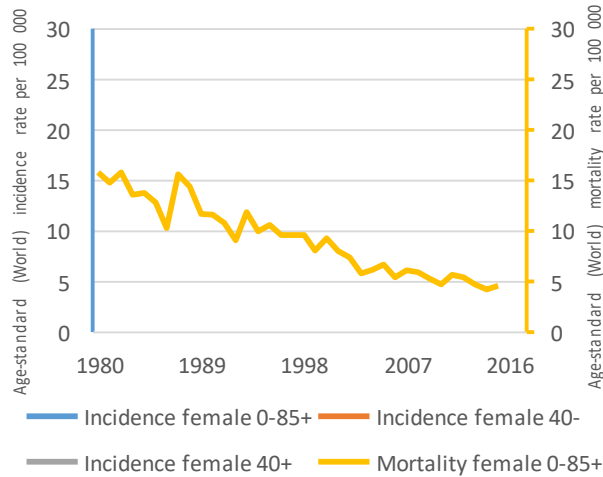

Thailand: Female

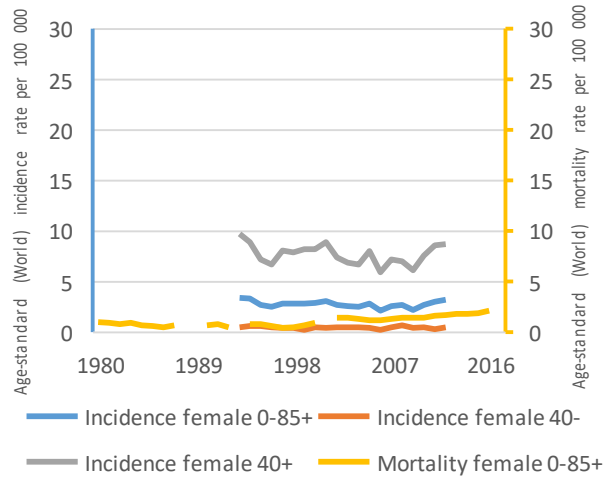

## Oceania

### Australia : Female

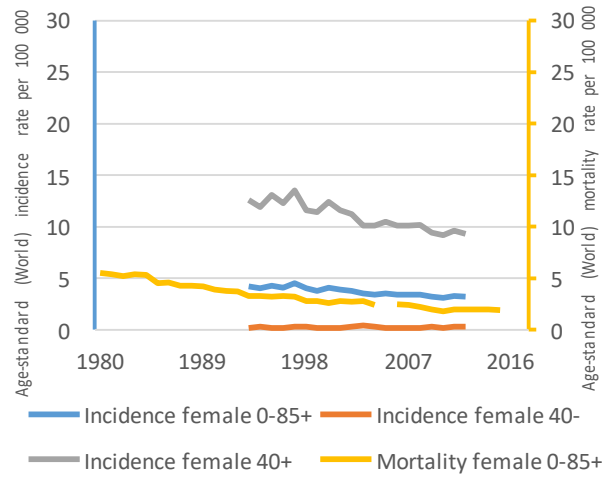

### New Zealand: Female

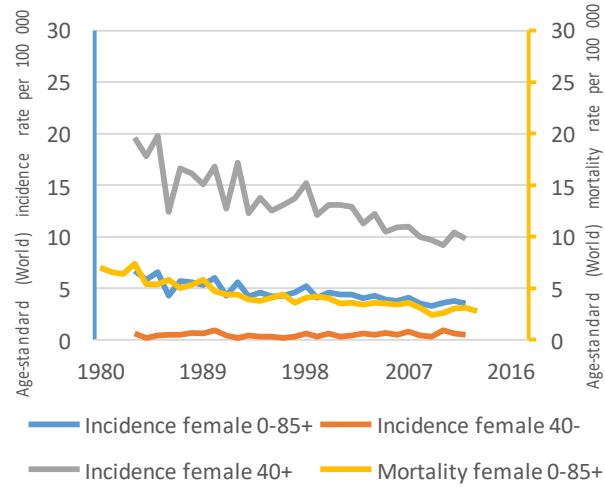

## Northern America

### Canada : Female

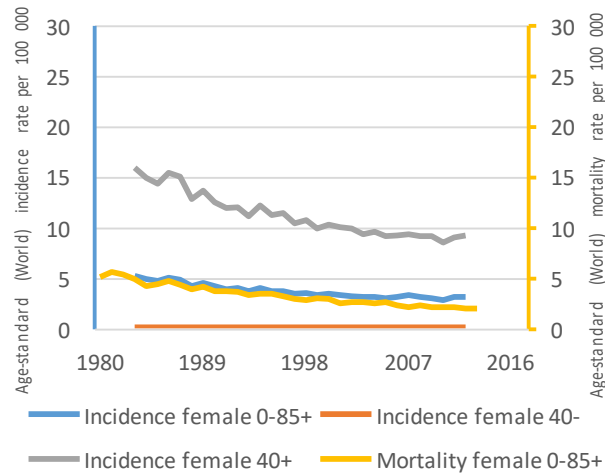

### USA: Female

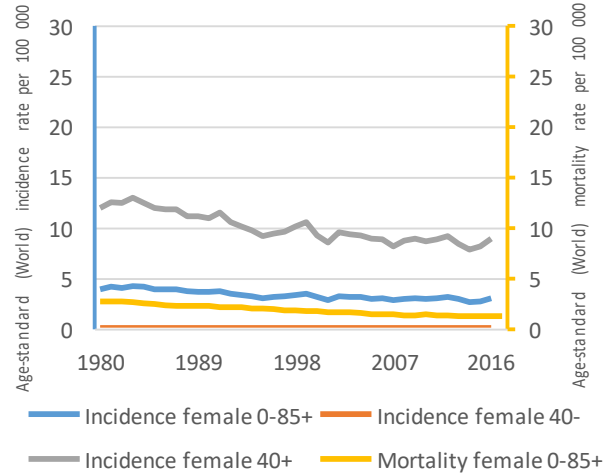

### USA Black: Female

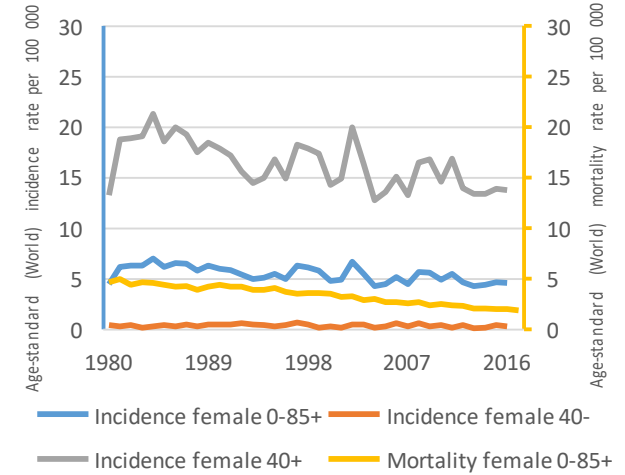

### USA White: Female

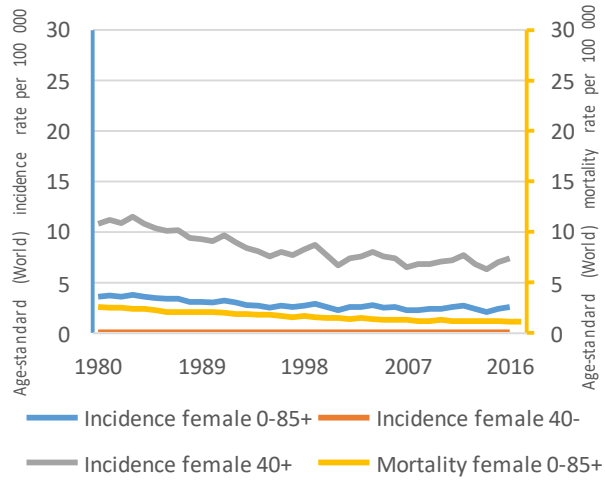

### Southern America

#### Brazil: Female

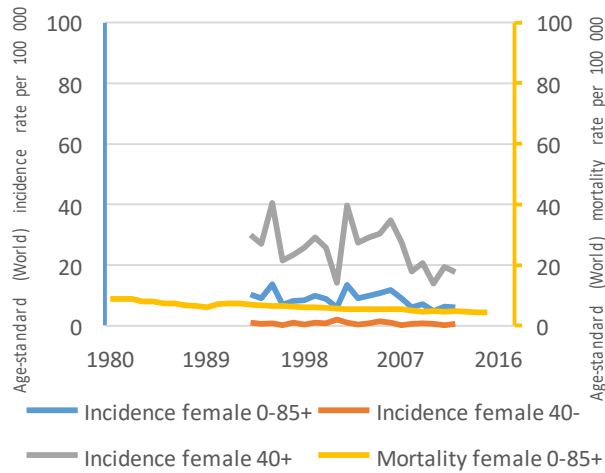

#### Chile : Female

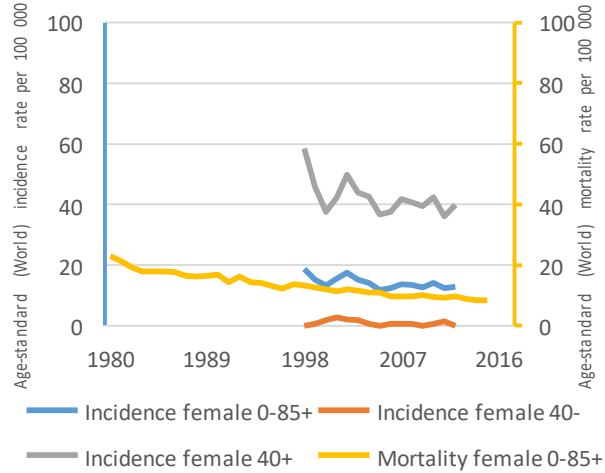

#### Colombia: Female

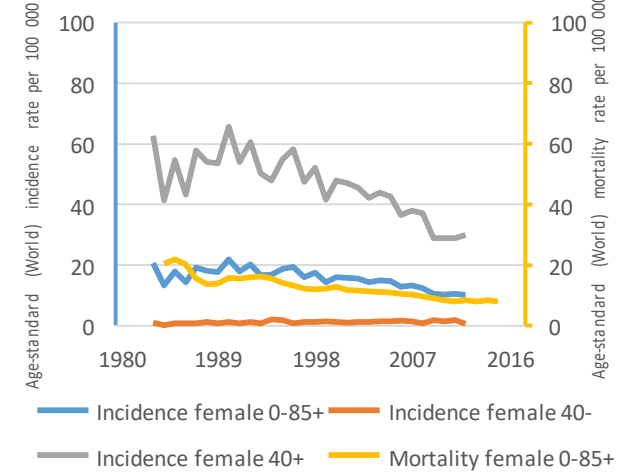

### Costa Rica: Female

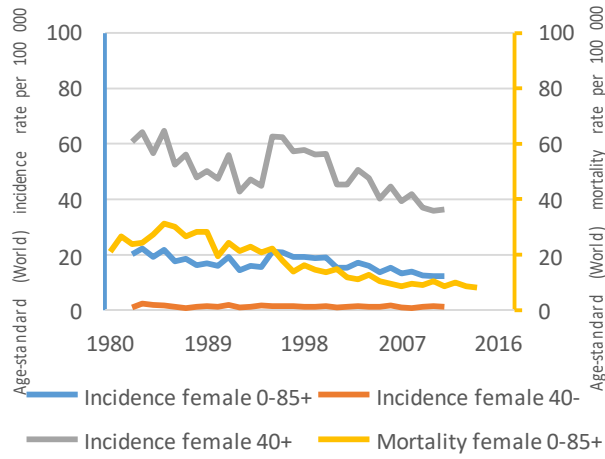

### Ecuador: Female

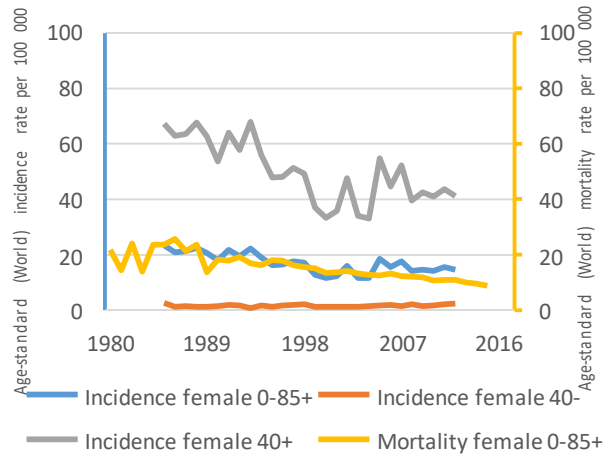

### Northern Europe

#### Denmark: Female

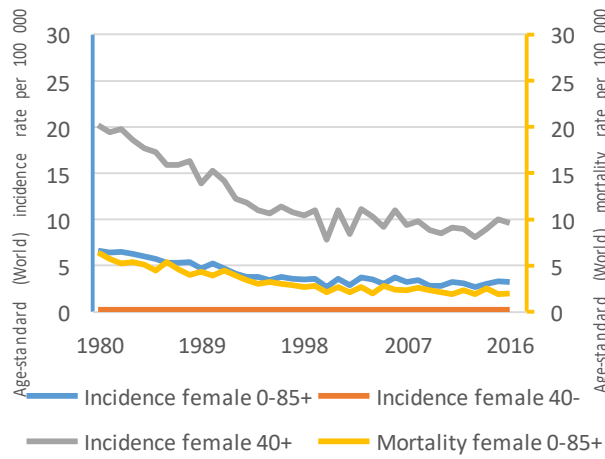

#### Estonia: Female

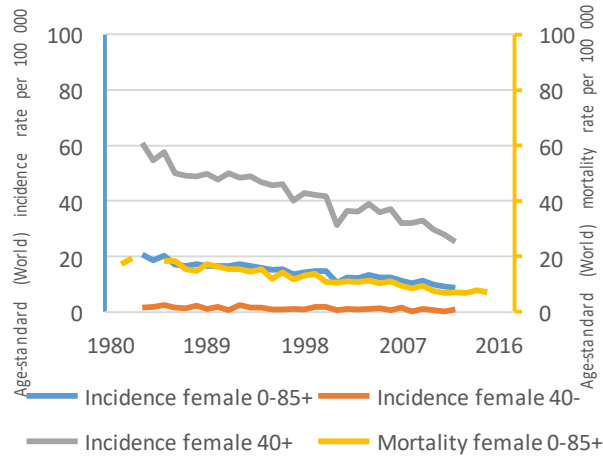

#### Faroe Islands: Female

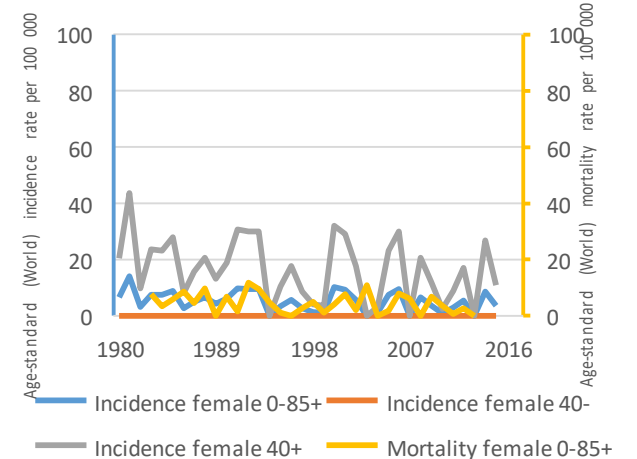

Finland: Female

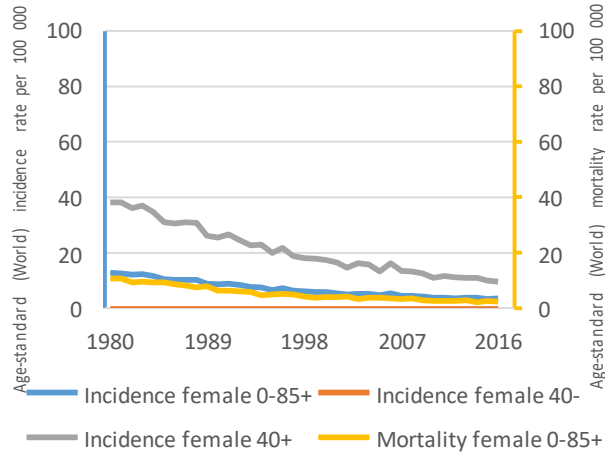

Greenland: Female

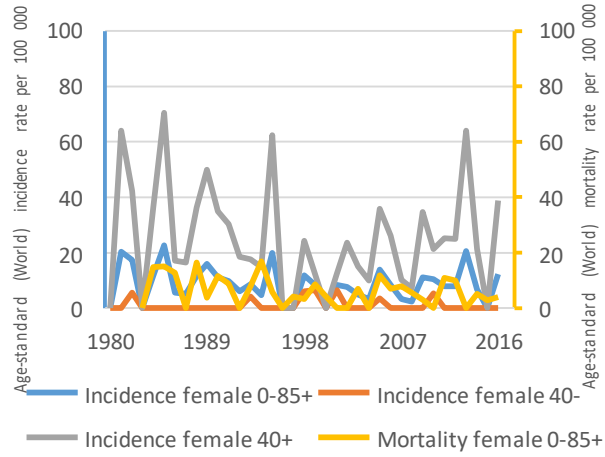

Iceland: Female

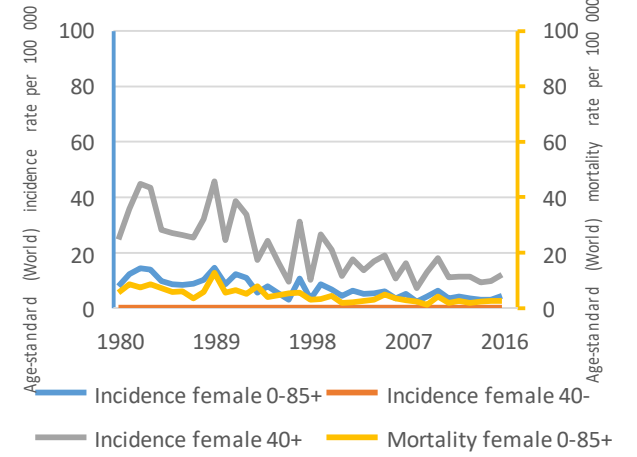

Ireland: Female

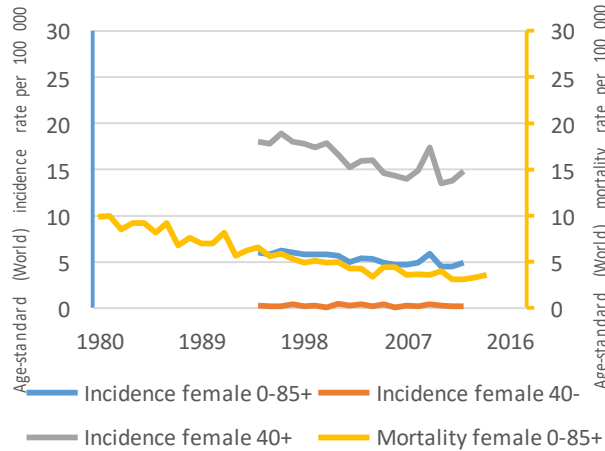

Latvia: Female

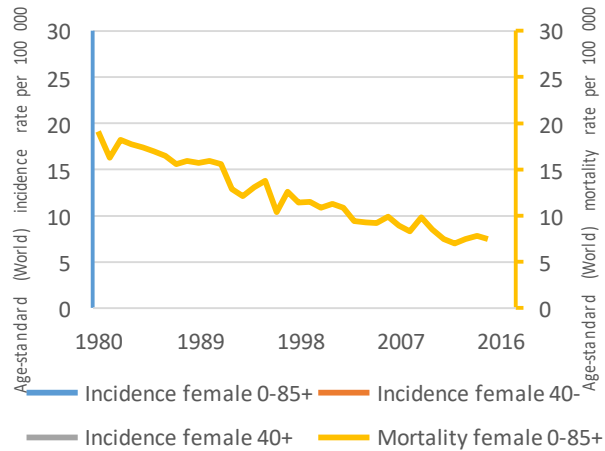

Lithuania: Female

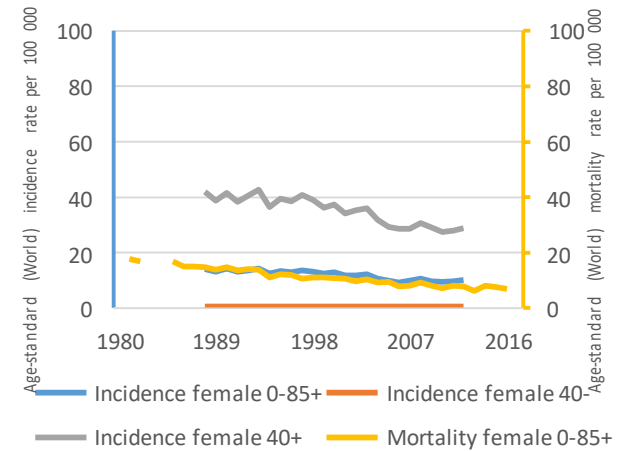



### Norway: Female

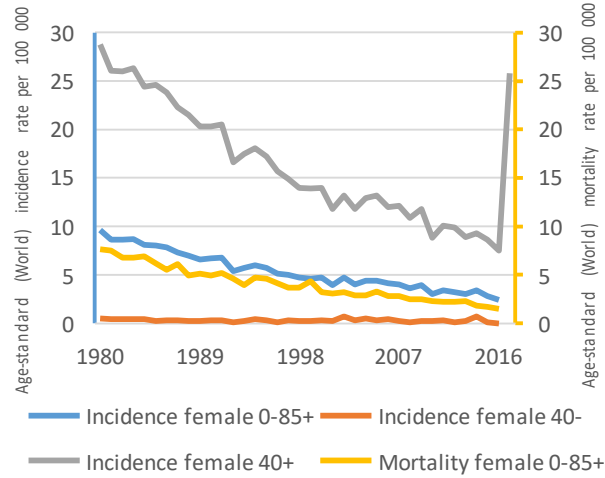

### Sweden: Female

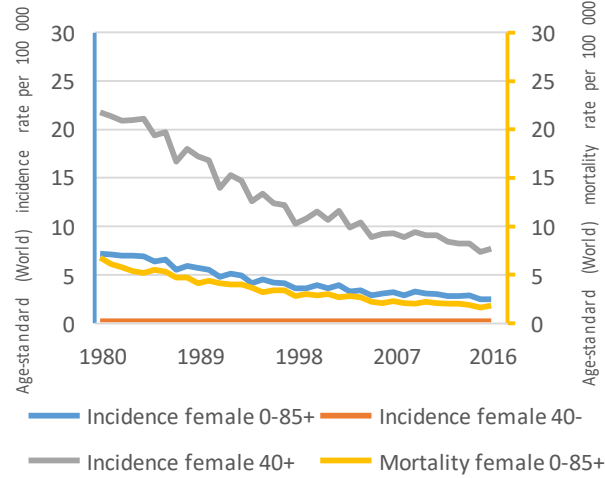

### United Kingdom: Female

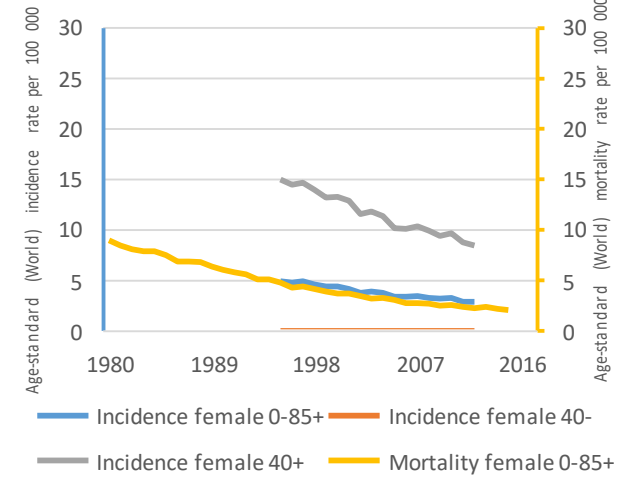

### Western Europe

#### Austria : Female

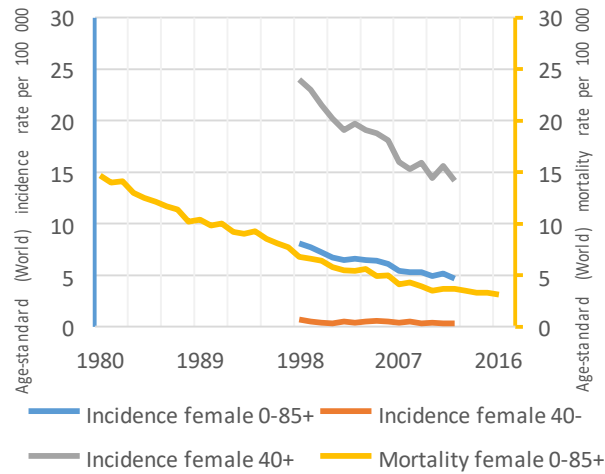

#### Belarus: Female

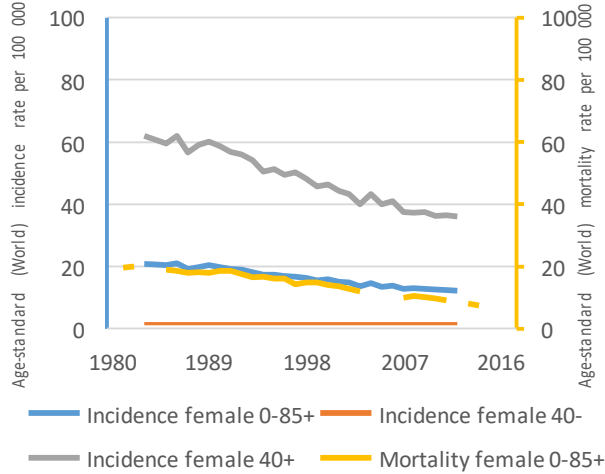

#### Belgium: Female

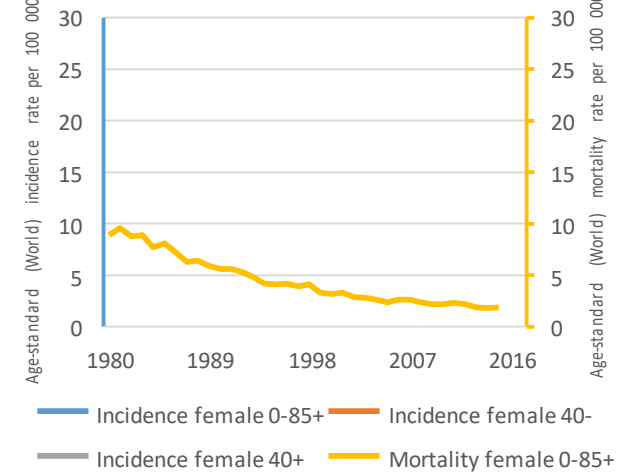

### France: Female

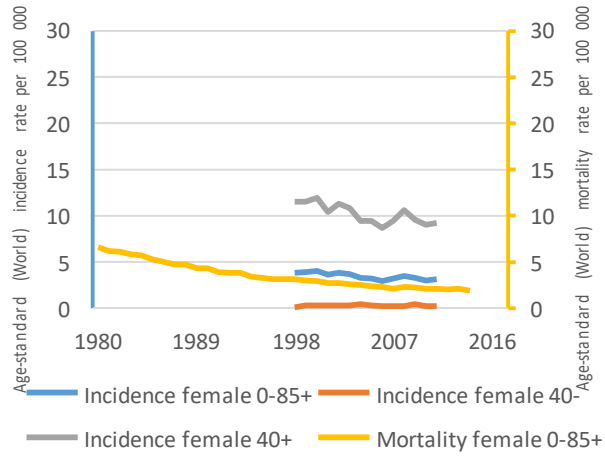

### Germany: Female

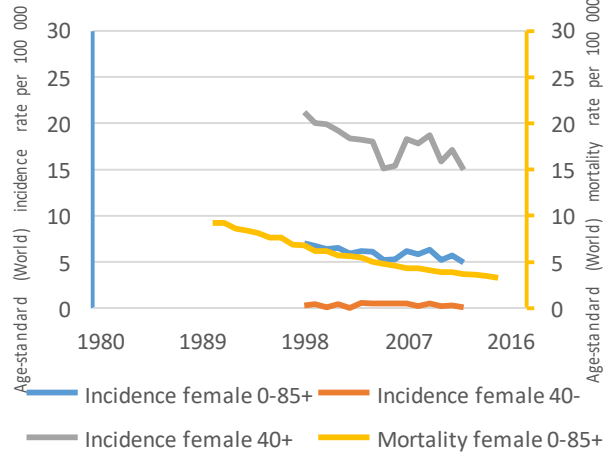

### Netherlands: Female

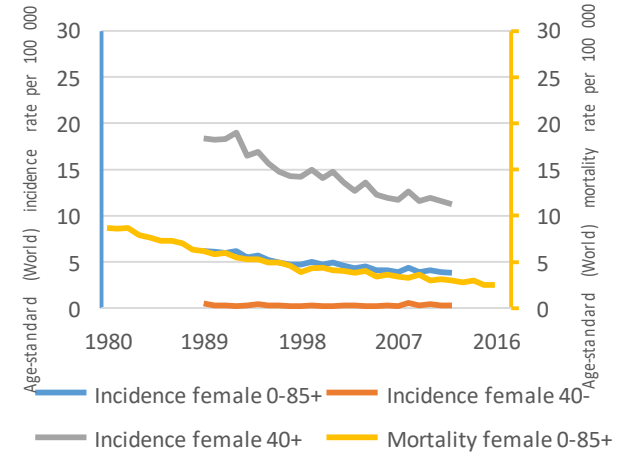

### Switzerland: Female

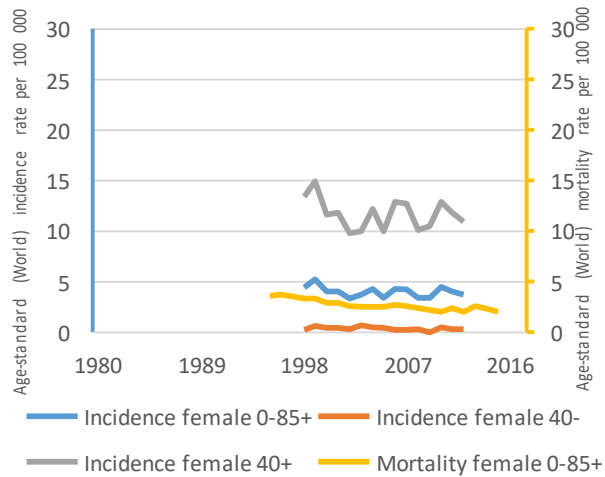

## Southern Europe

### Bulgaria: Female

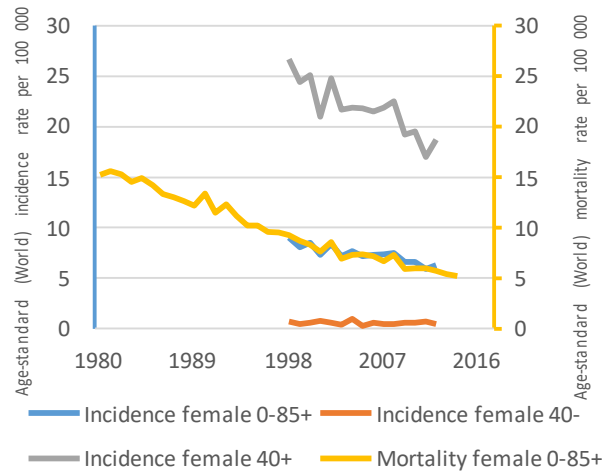

### Croatia: Female

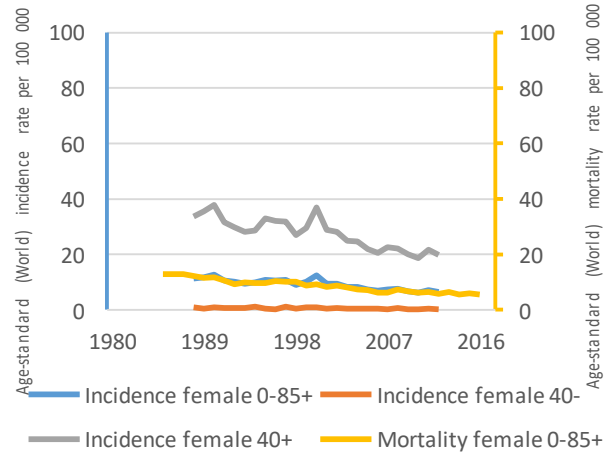

### Cyprus: Female

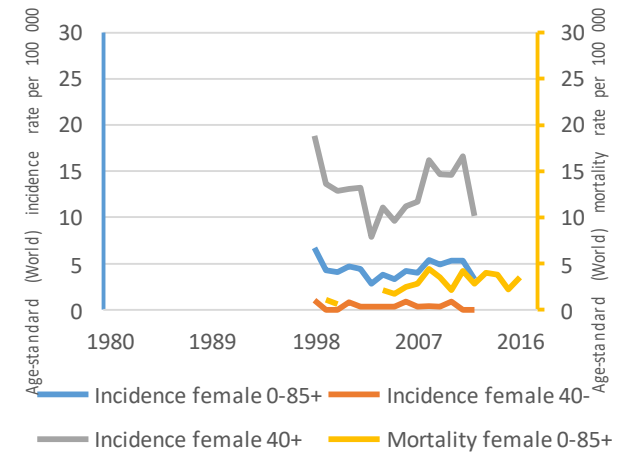

### Italy: Female

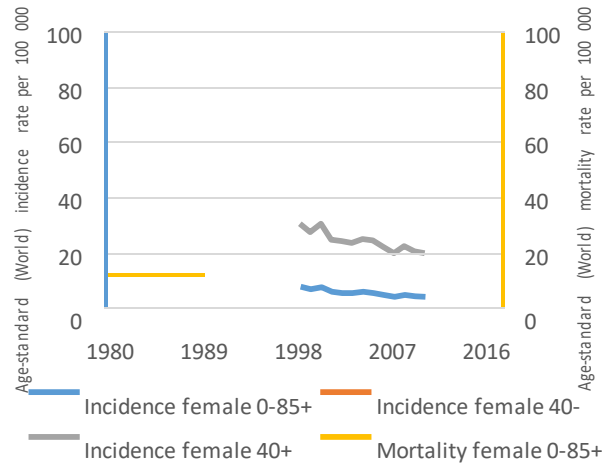

### Malta: Female

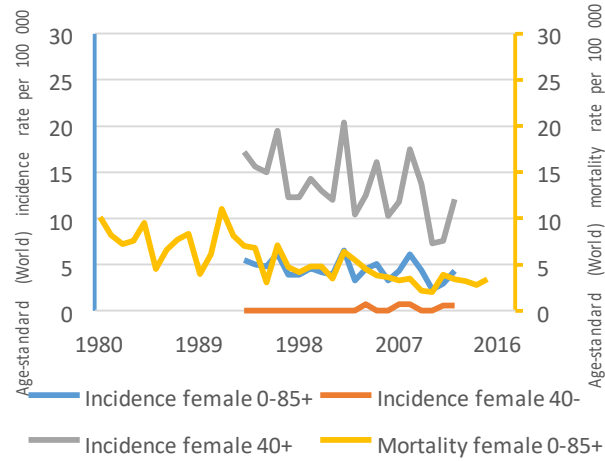

### Portugal: Female

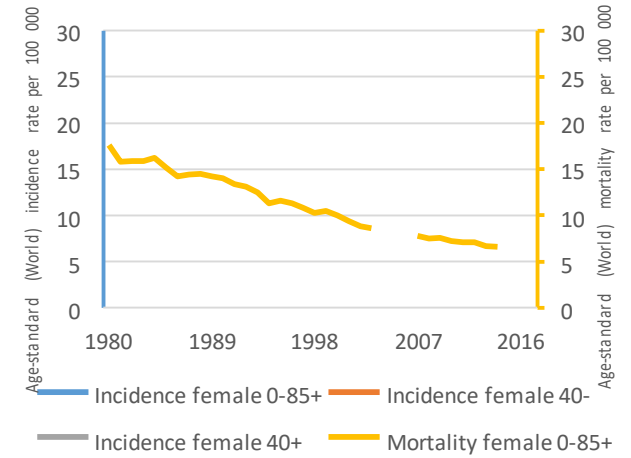

### Slovenia: Female

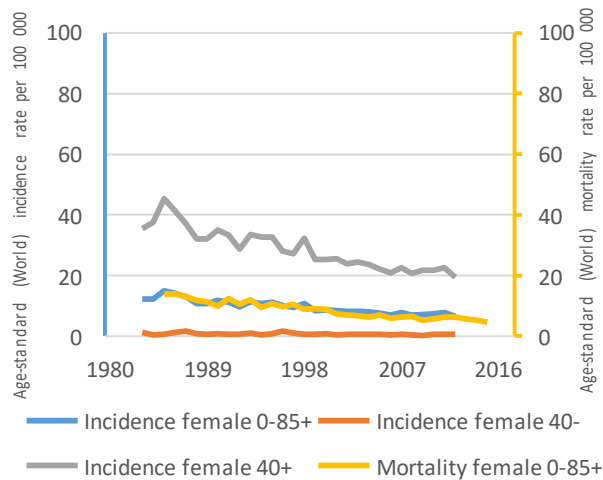

### Spain: Female

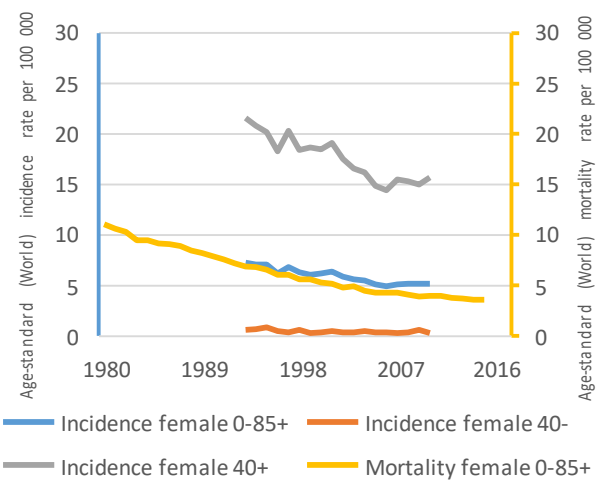

### Turkey: Female

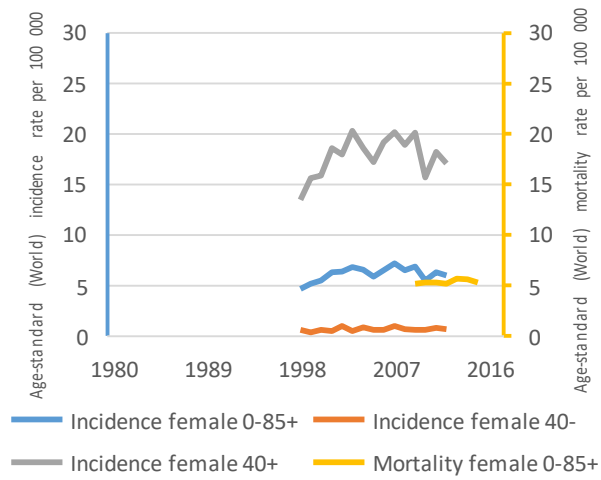

## Eastern Europe

### Czech Republic: Female

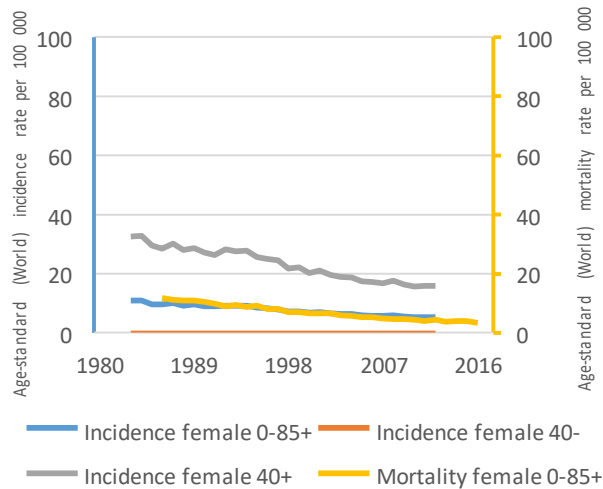

### Poland: Female

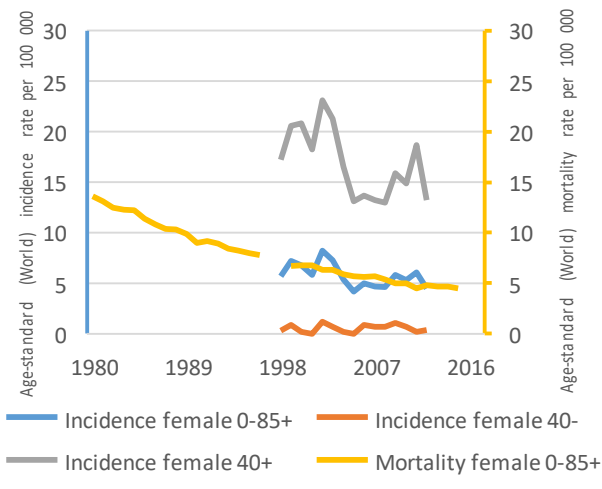

### Slovakia: Female

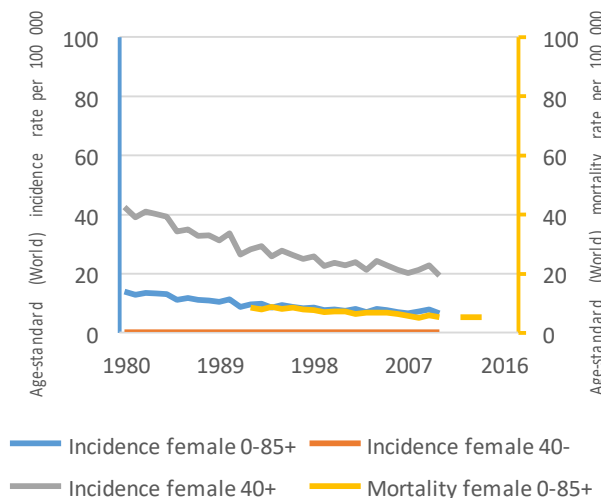

### Russian Federation: Female

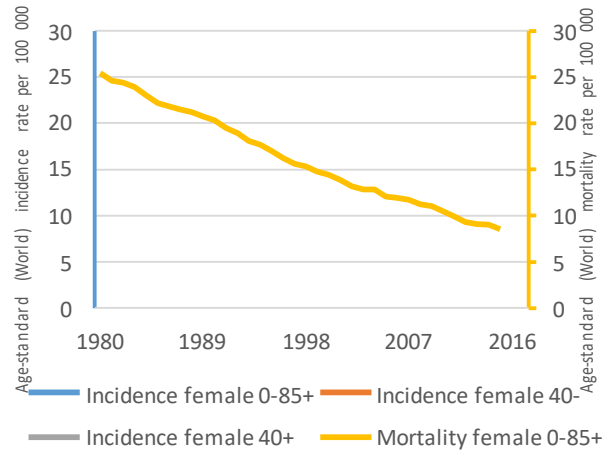

## Africa

### Uganda: Female

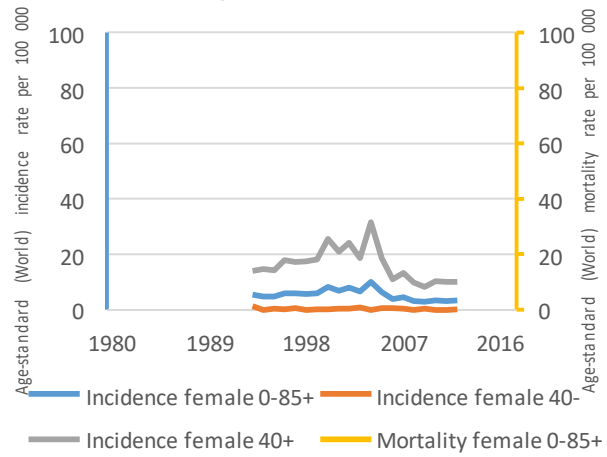

**eFigure 2:** The graphs of the joinpoint regression output a.) Incidence

male all ages

## Asia

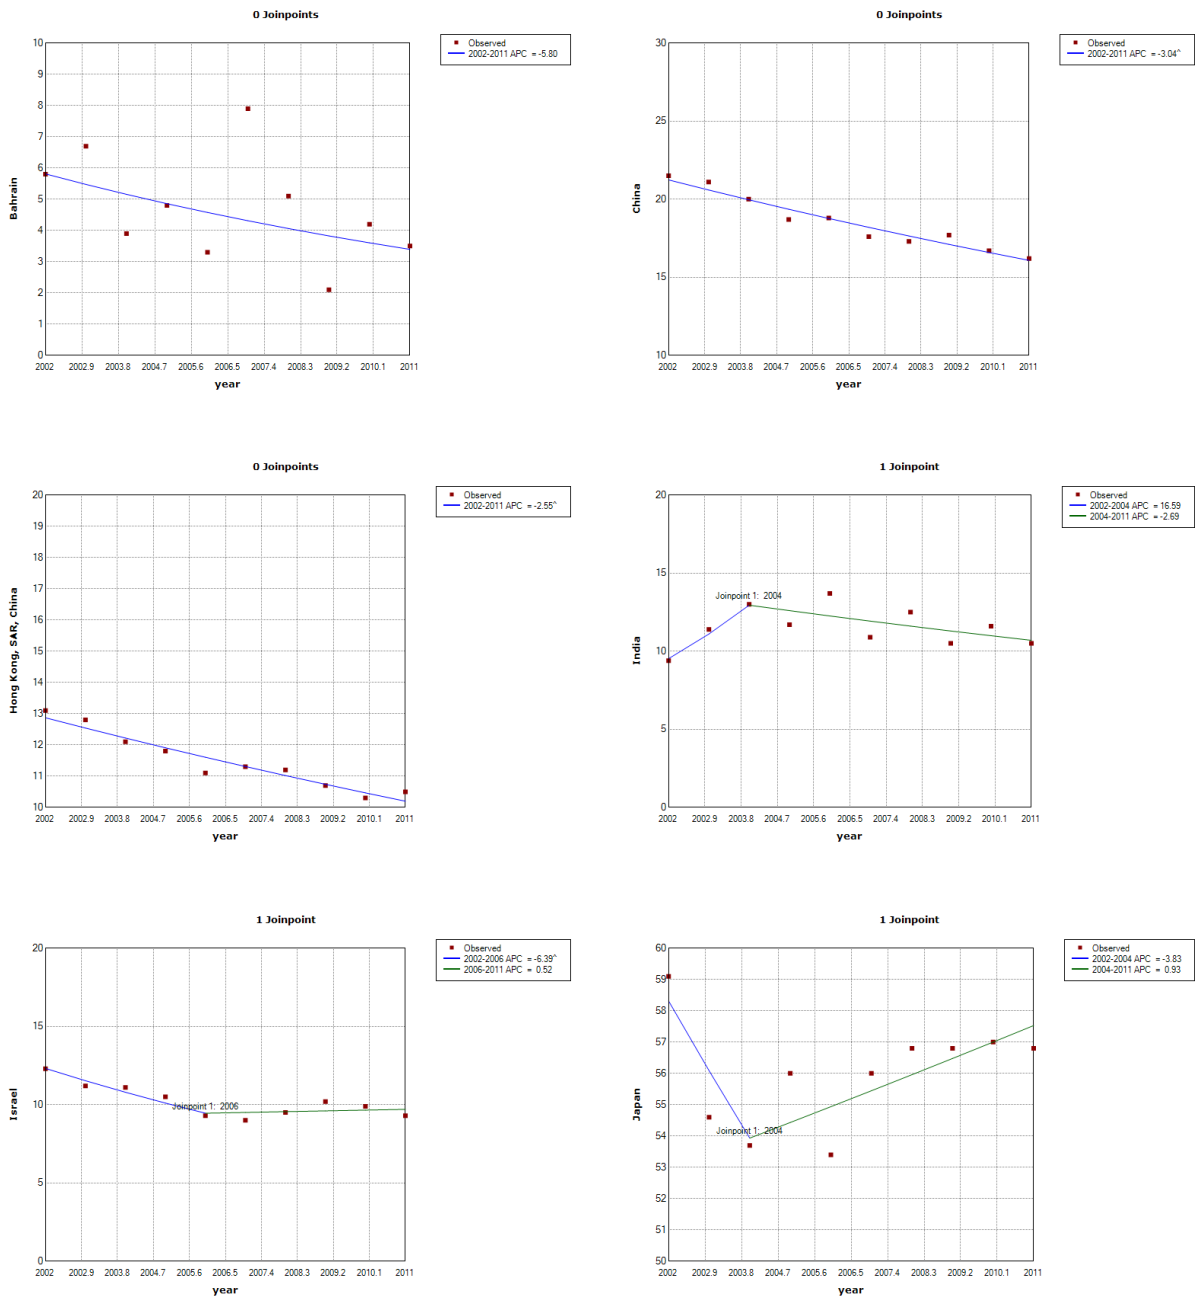

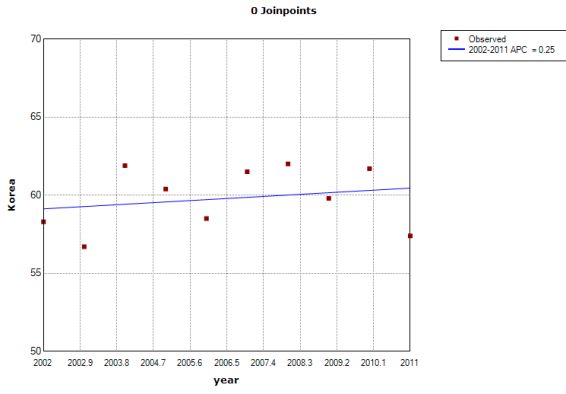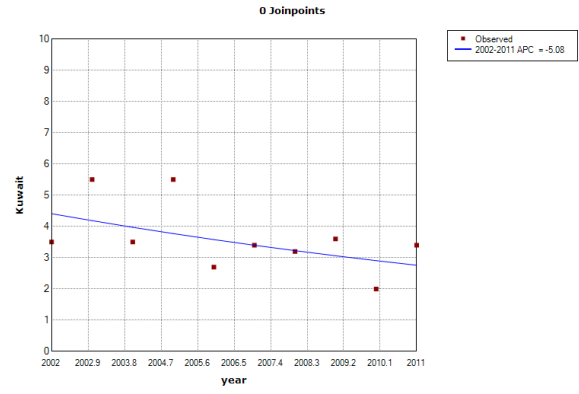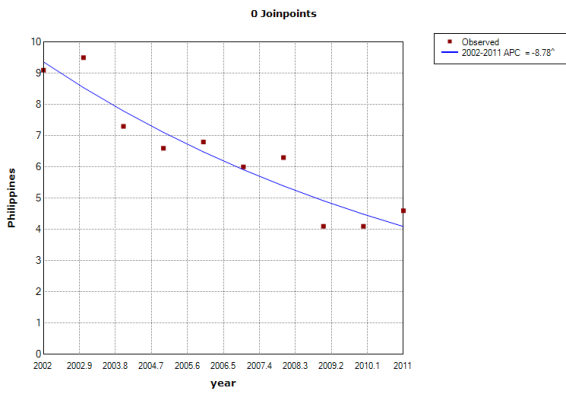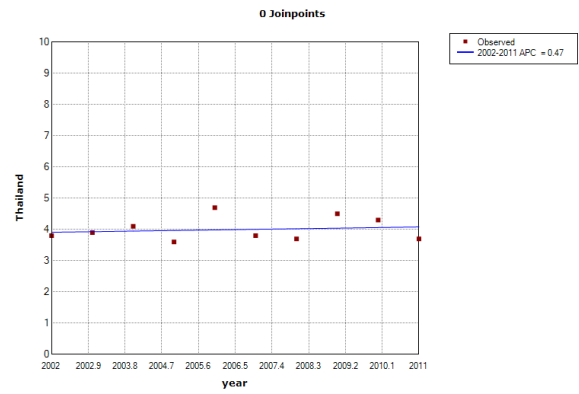

## Oceania

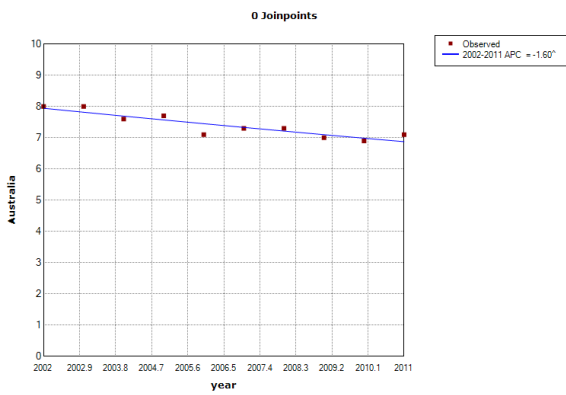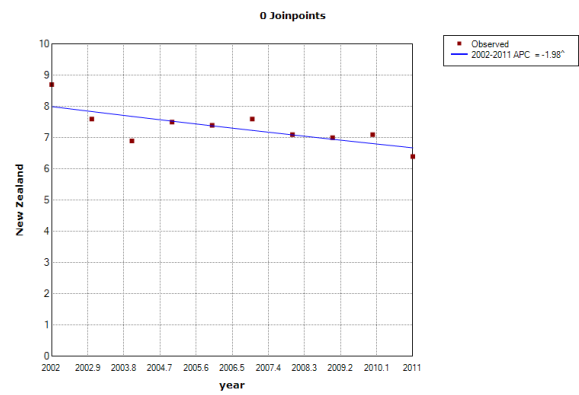

## Northern America

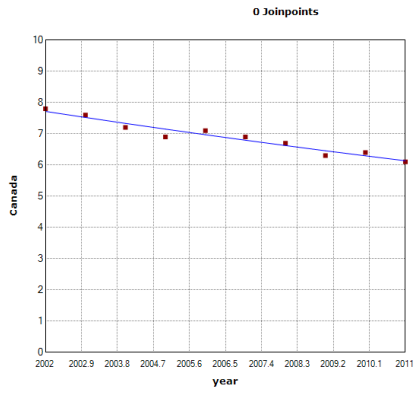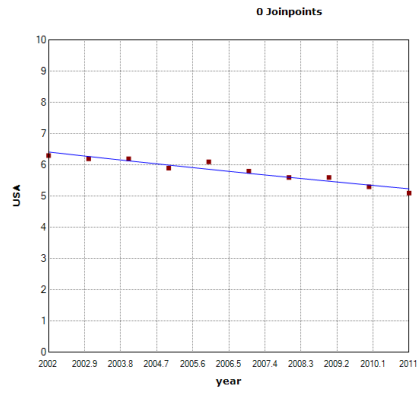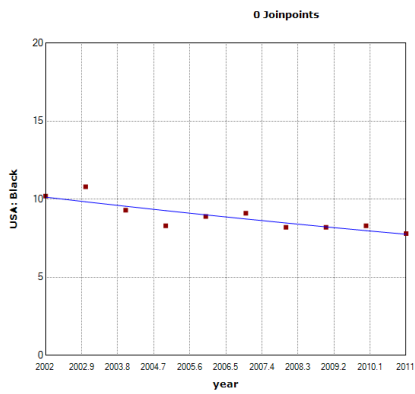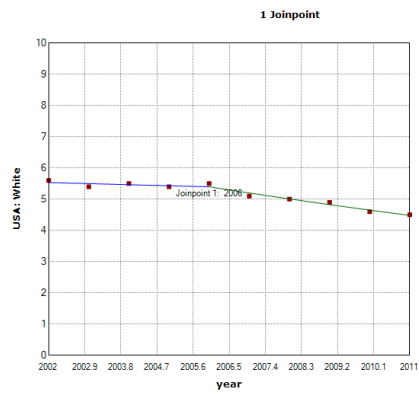

## Southern America

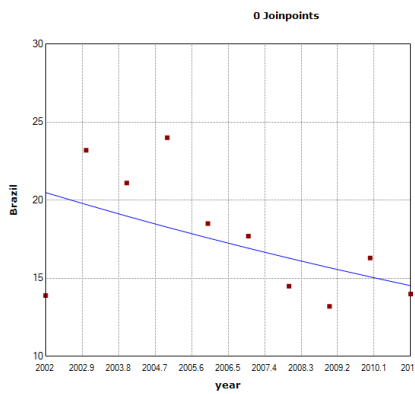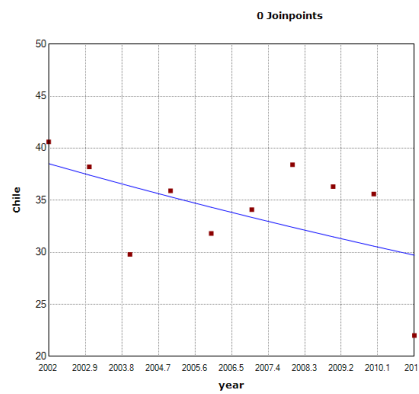



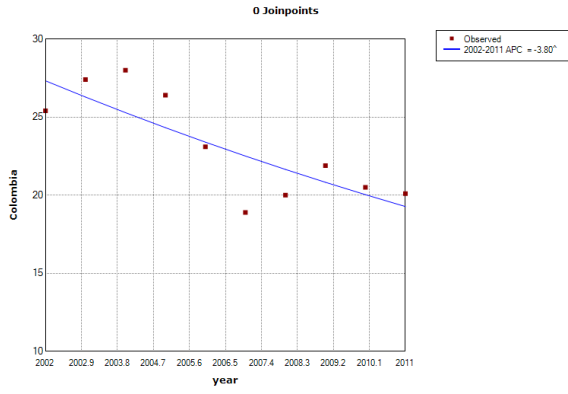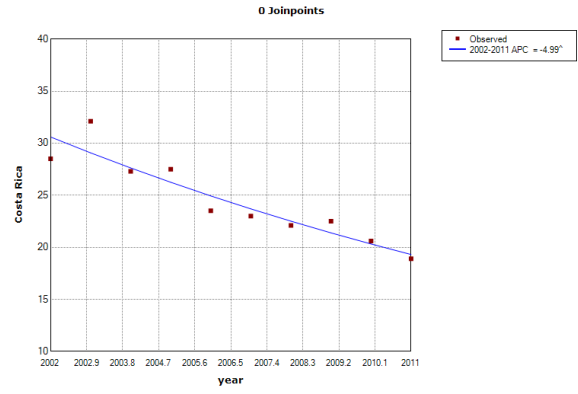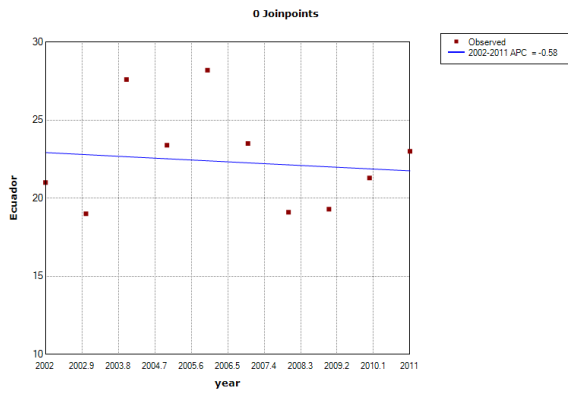

## Northern Europe

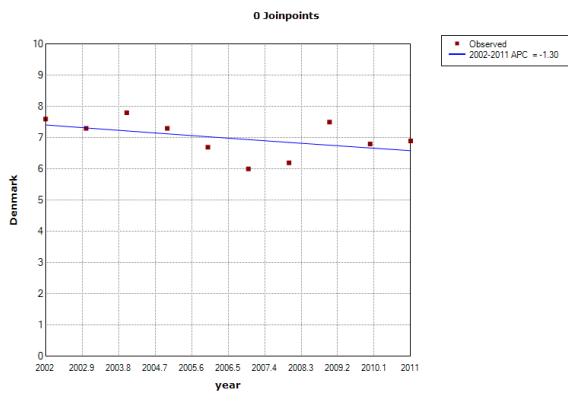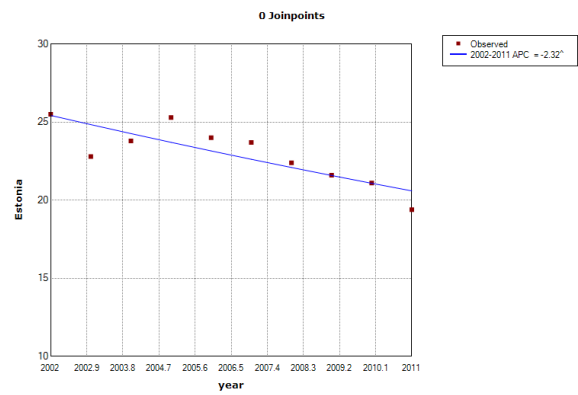

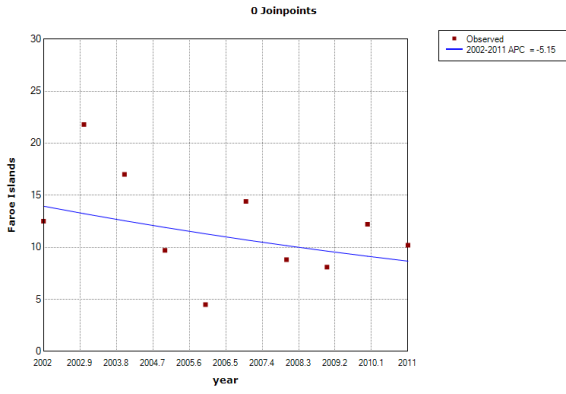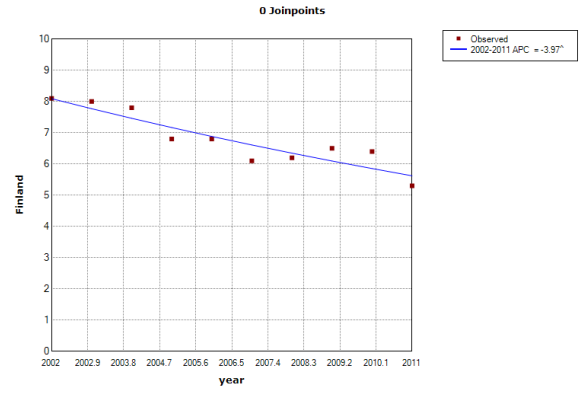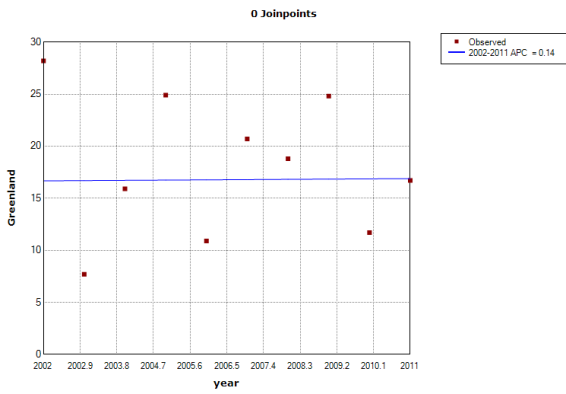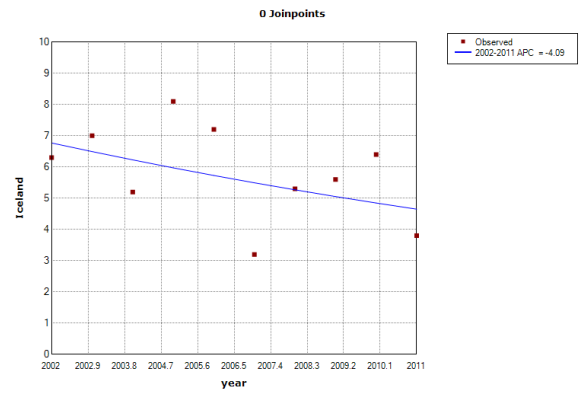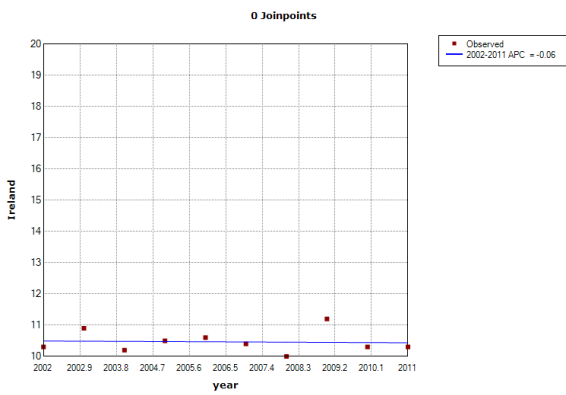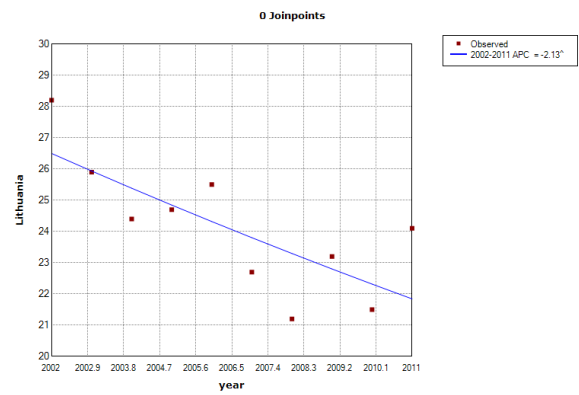

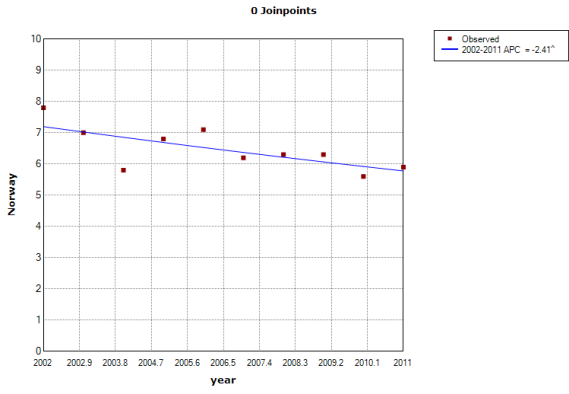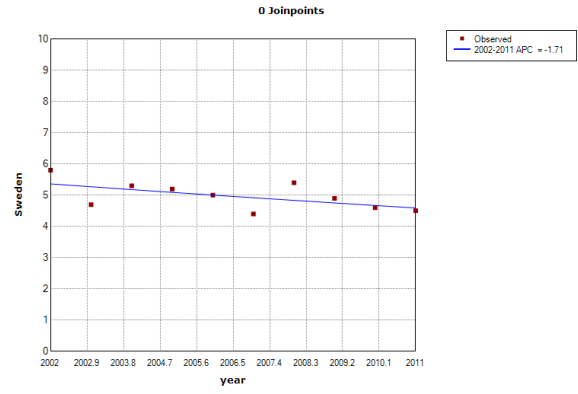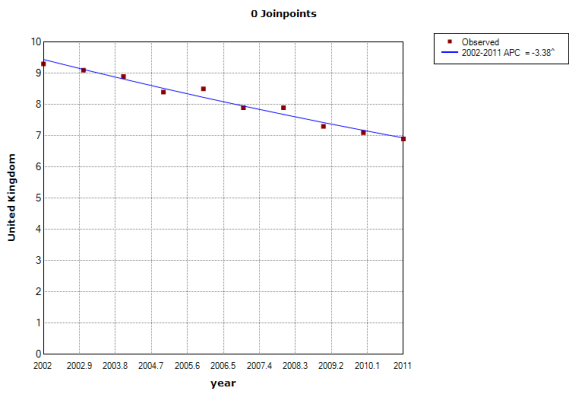

## Western Europe

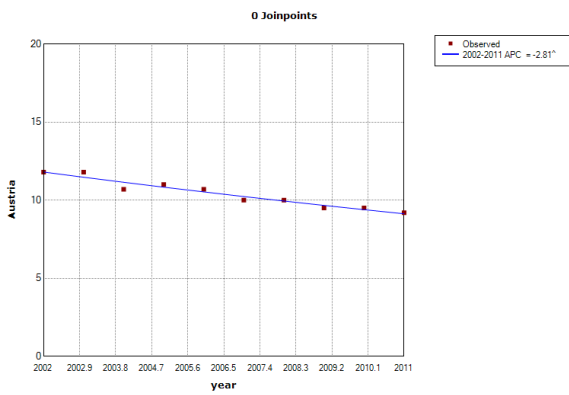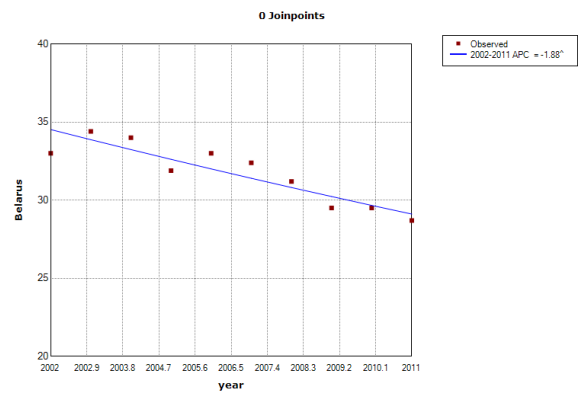

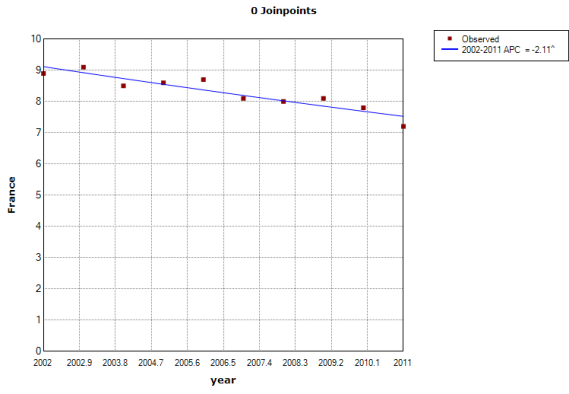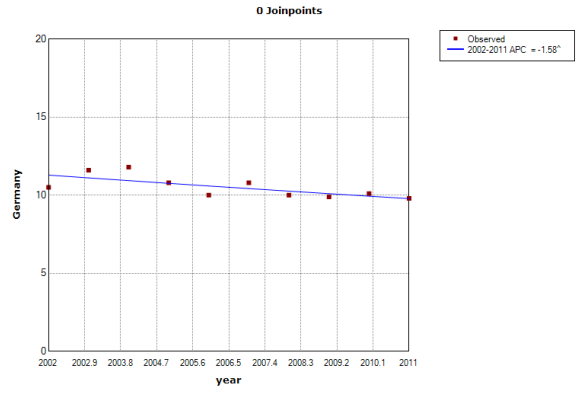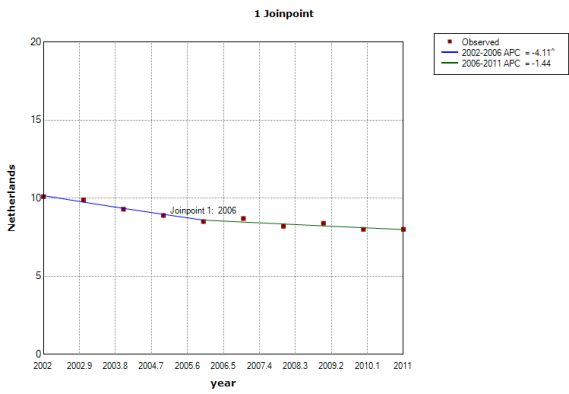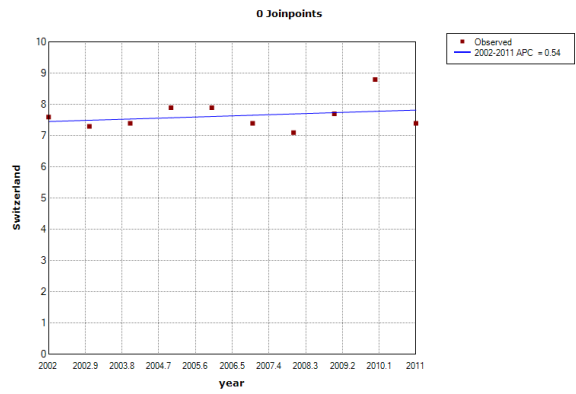

## Southern Europe

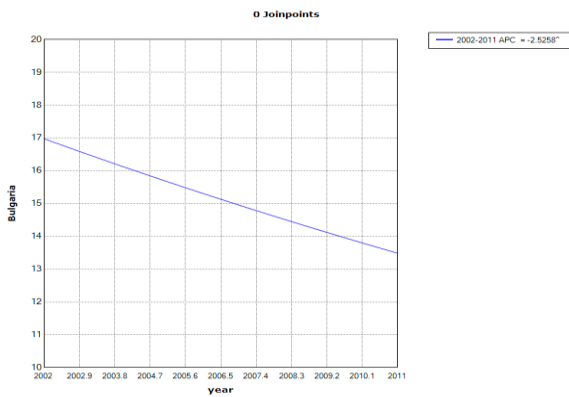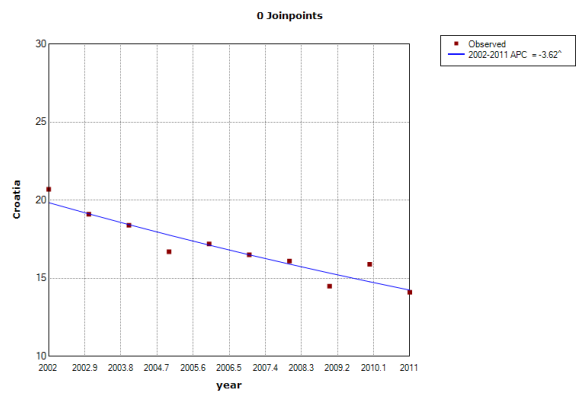

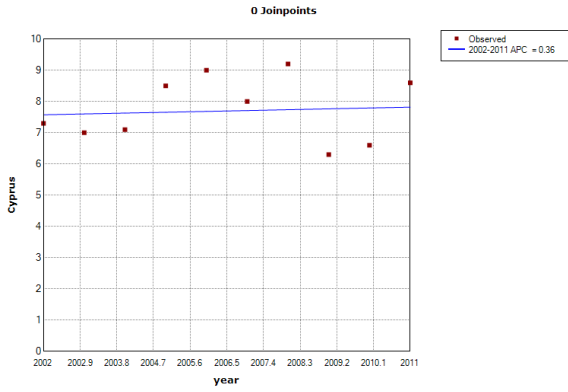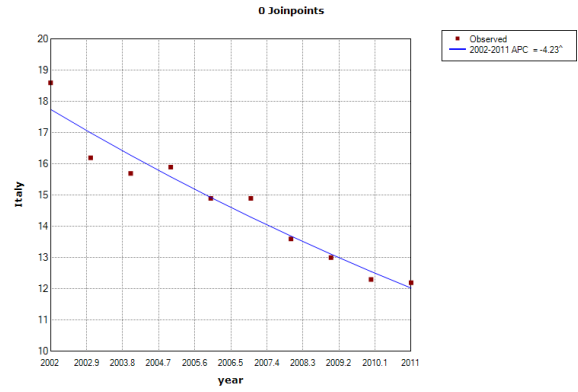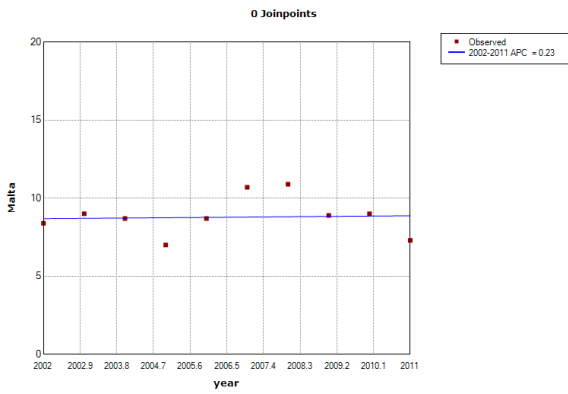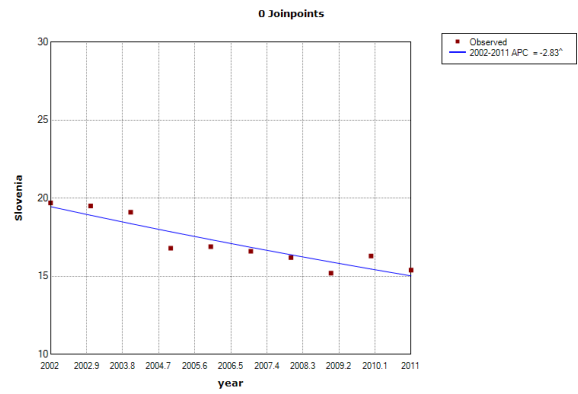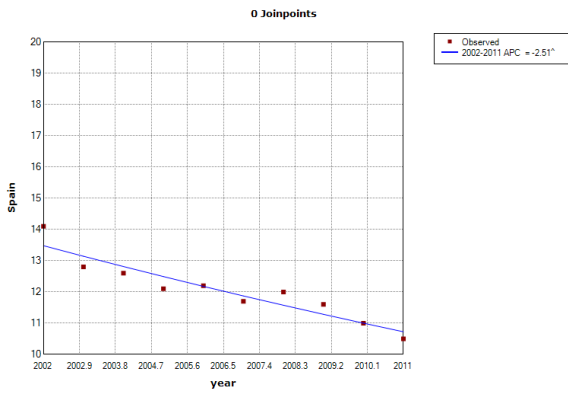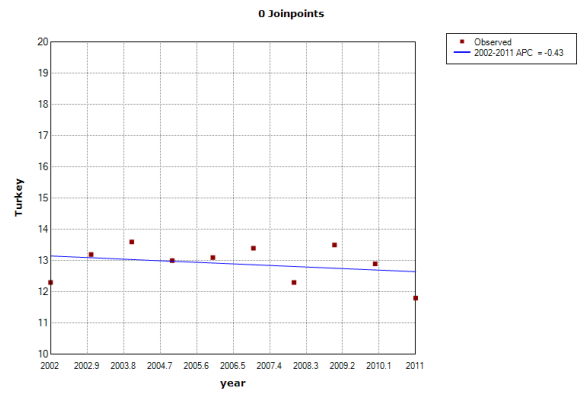

## Eastern Europe

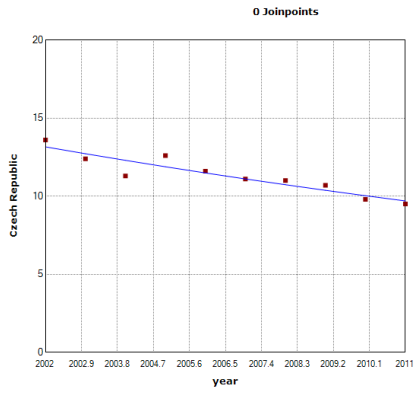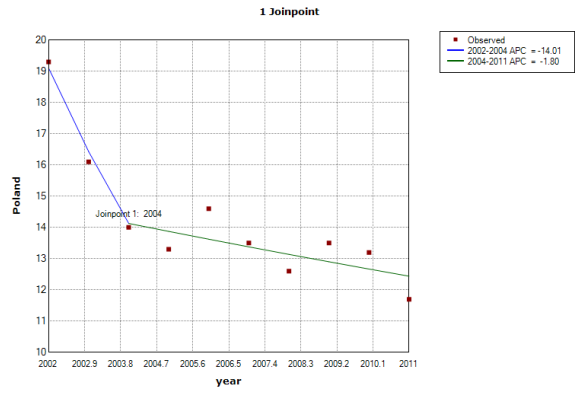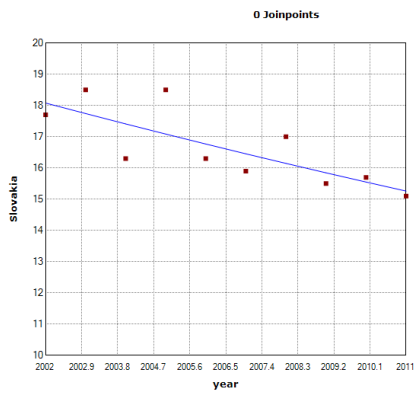

## Africa

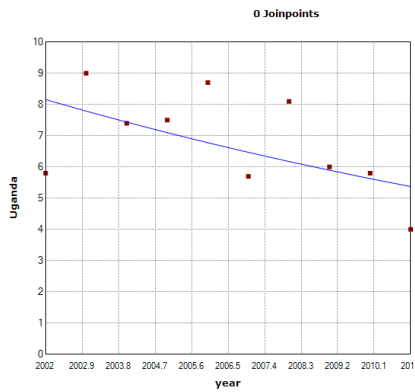

b.) Incidence female all ages

Asia

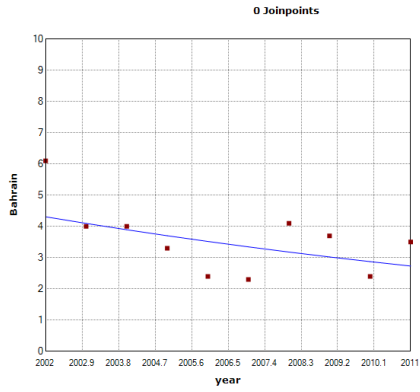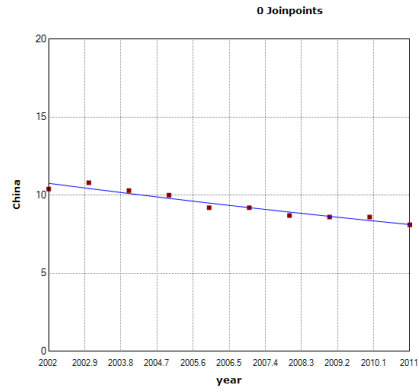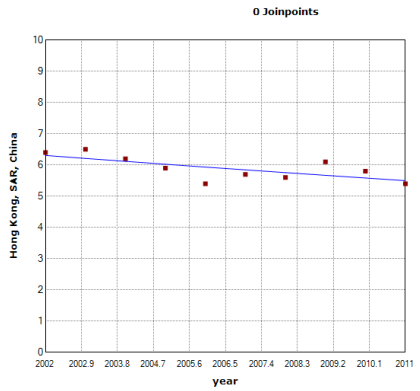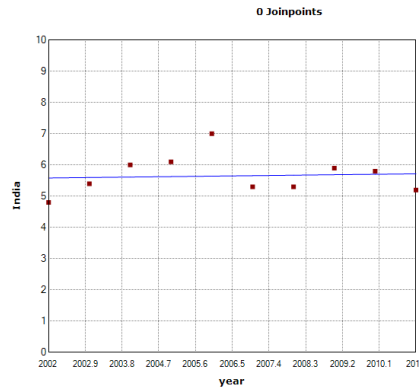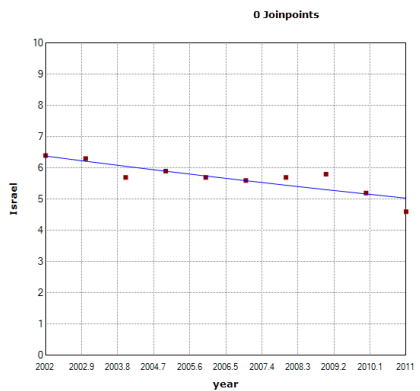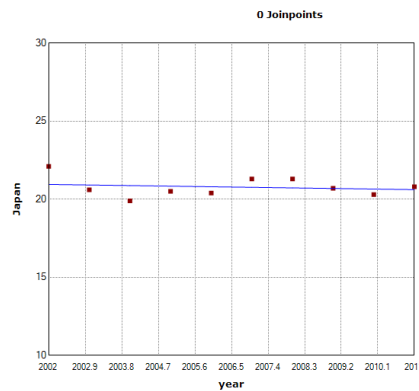

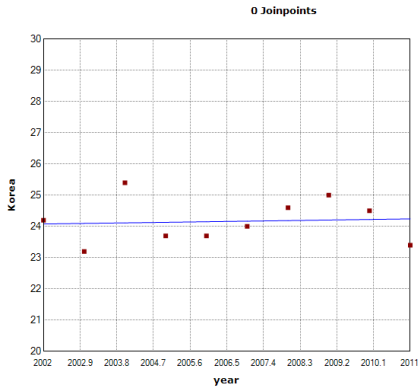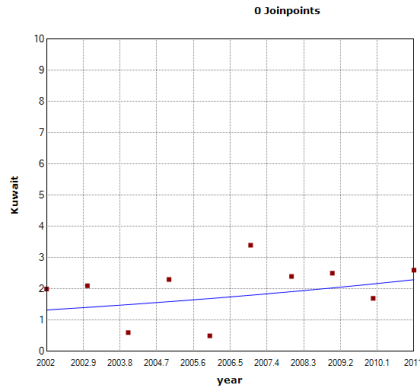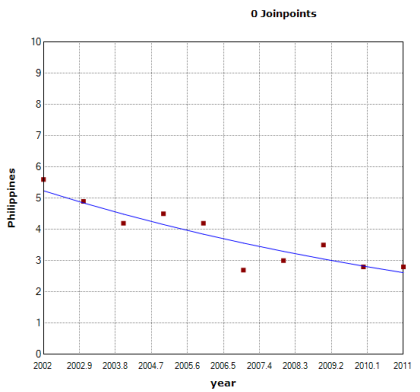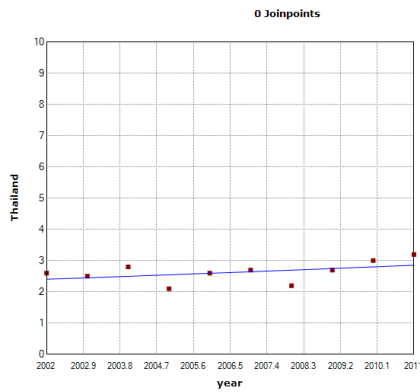

## Oceania

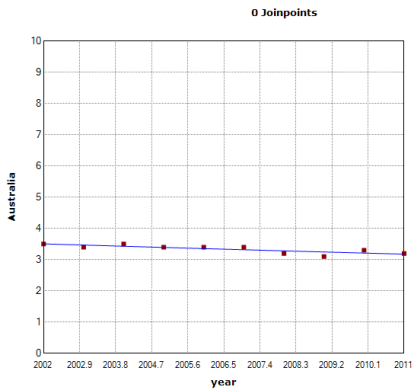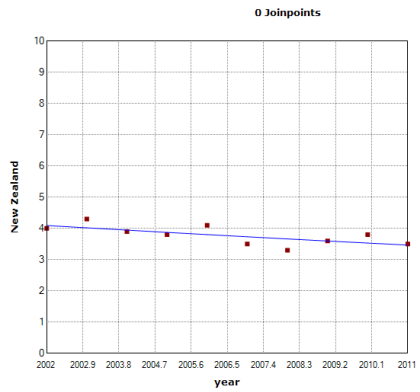



## Northern America

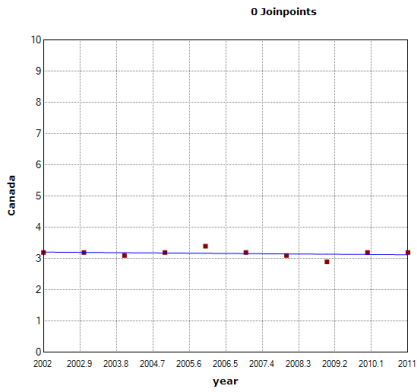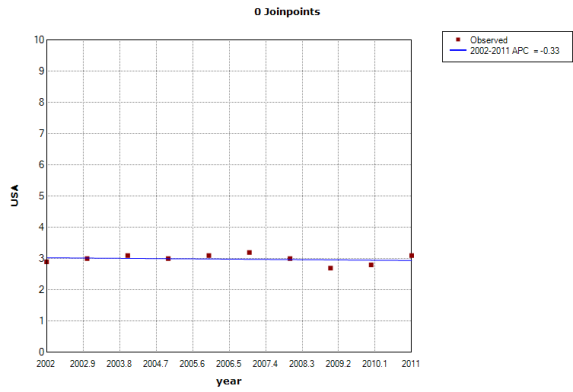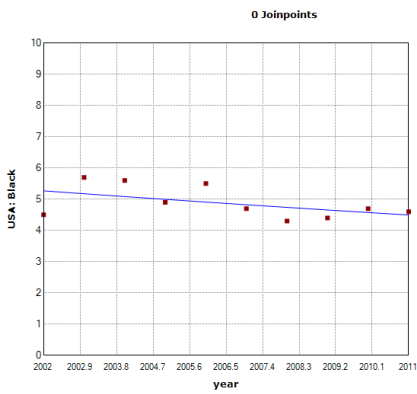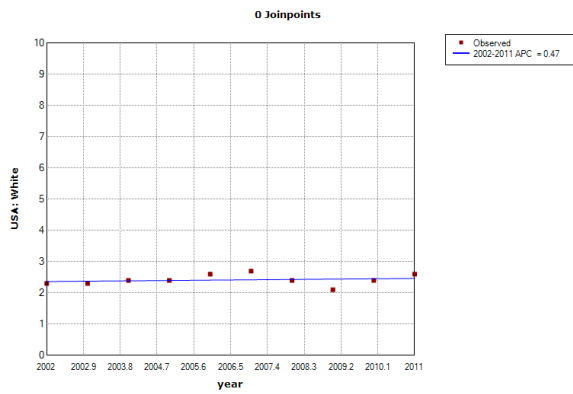

## Southern America

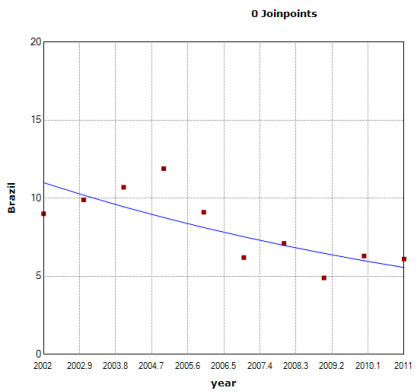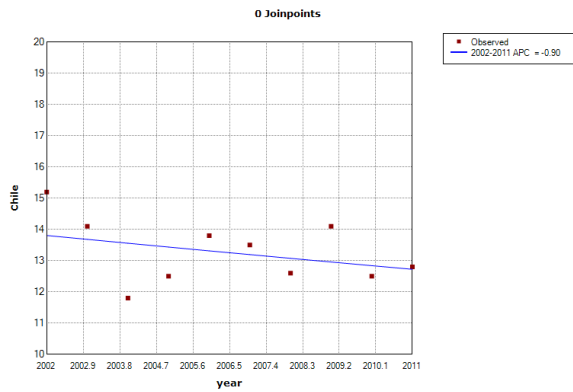

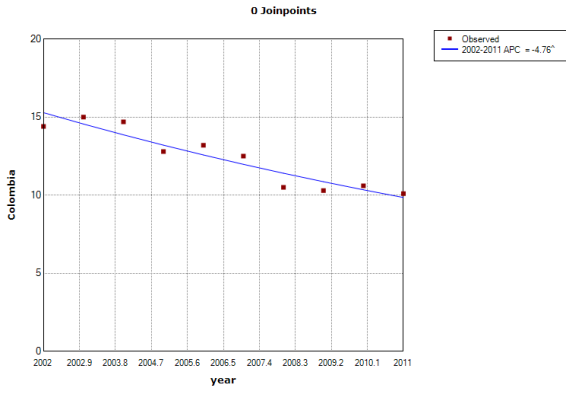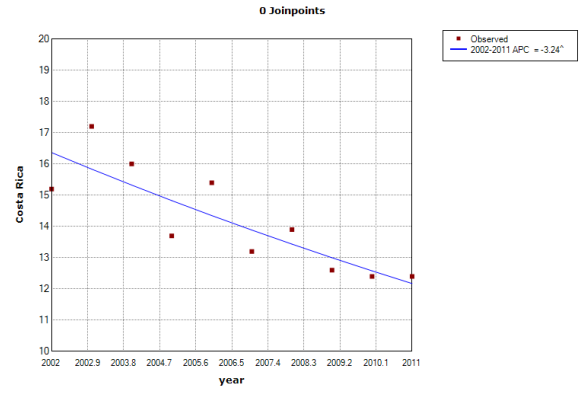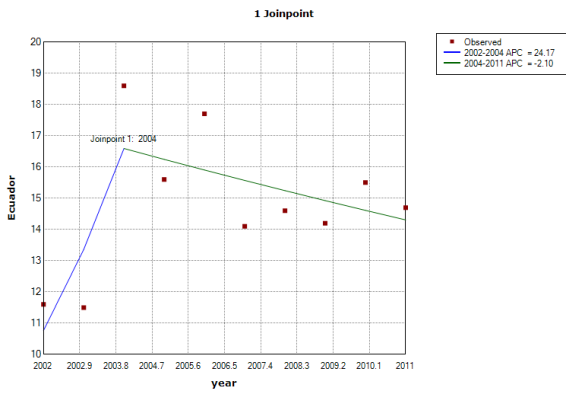

## Northern Europe

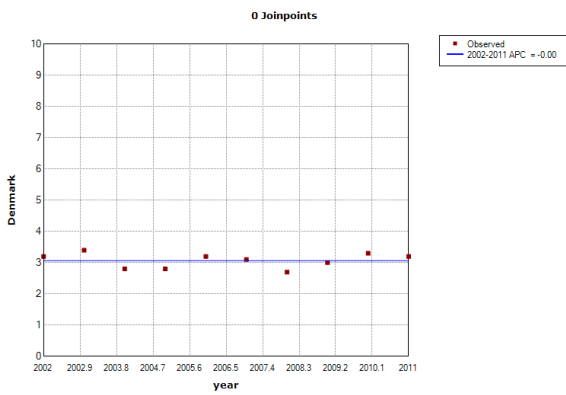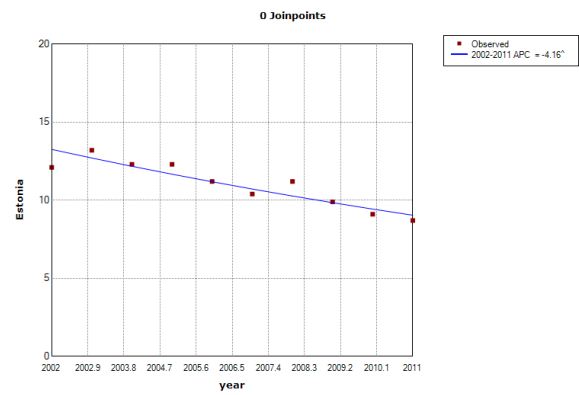

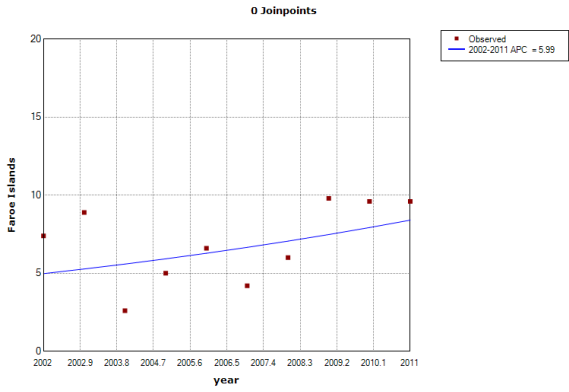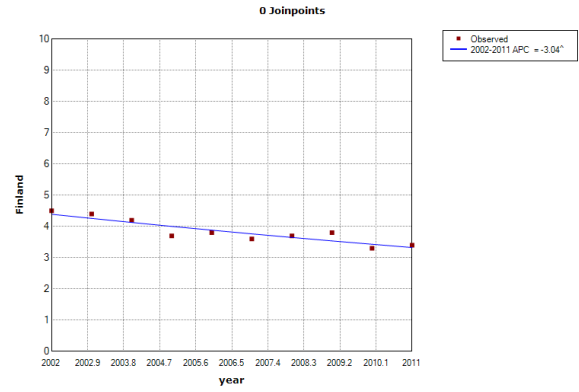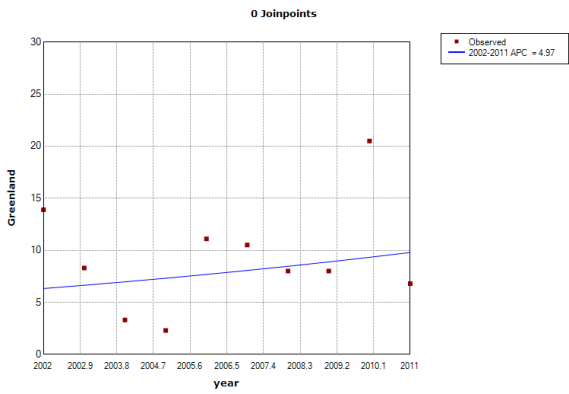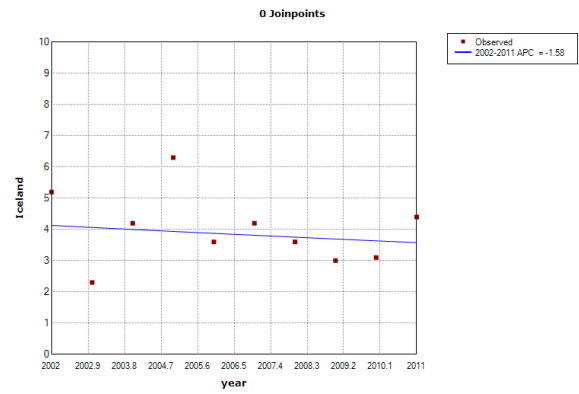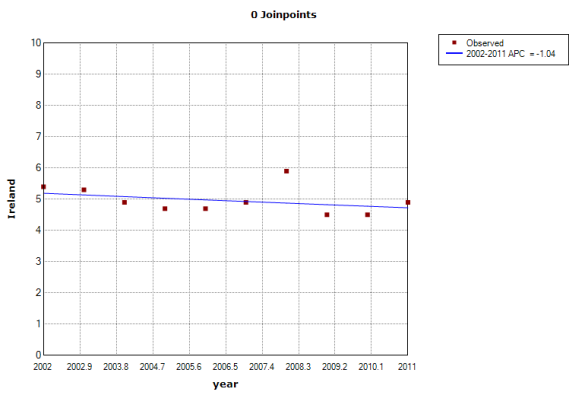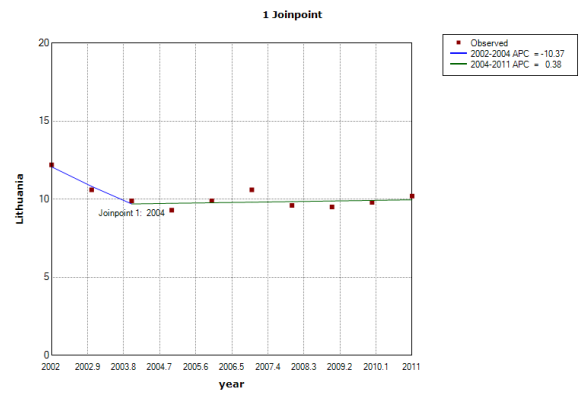

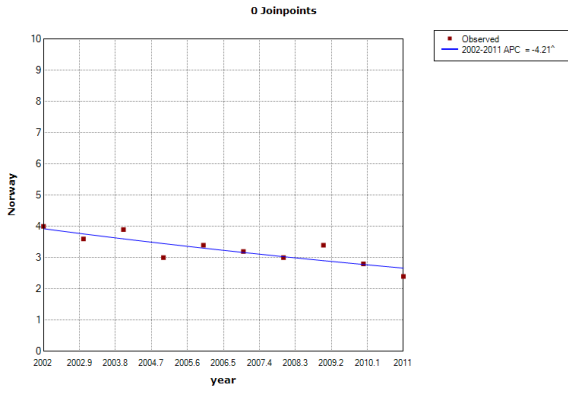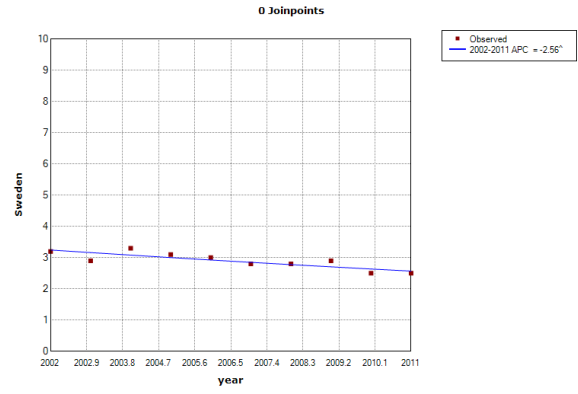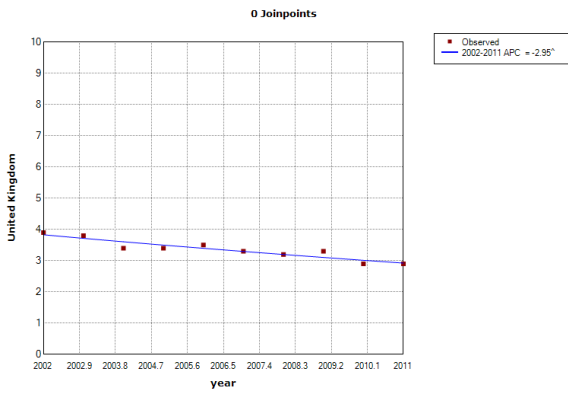

## Western Europe

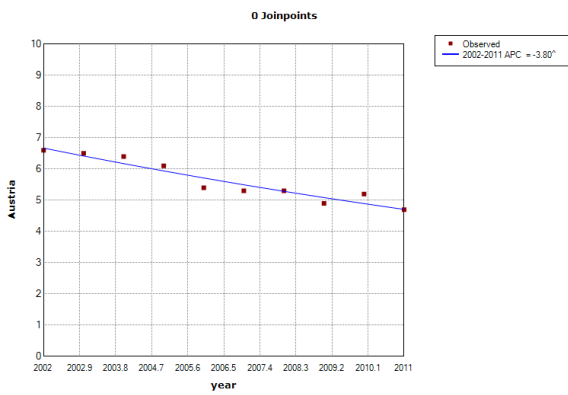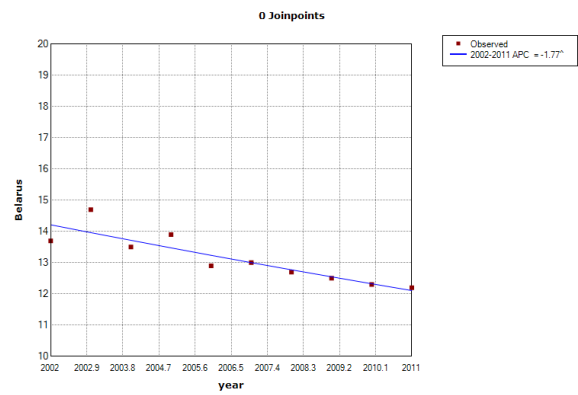

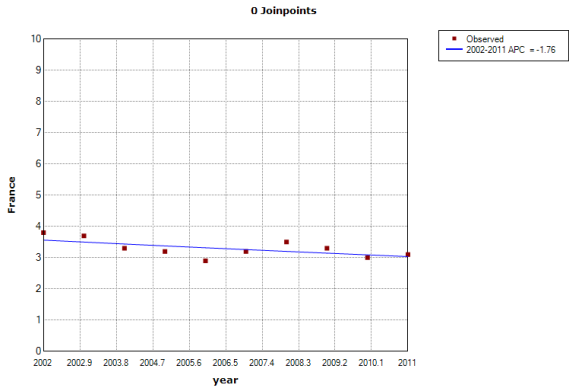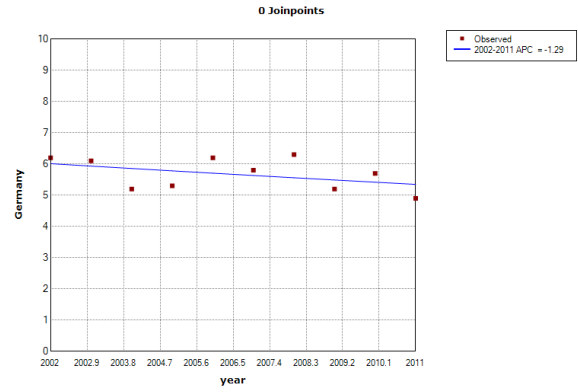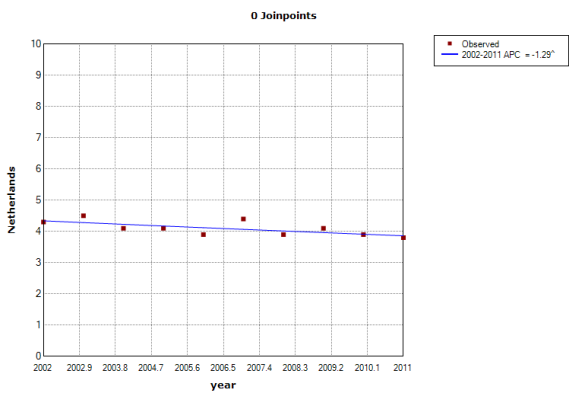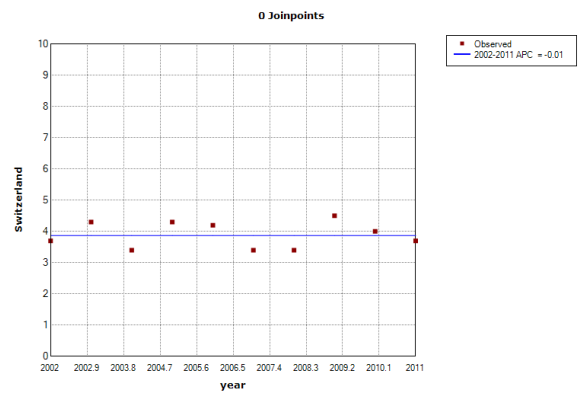

## Southern Europe

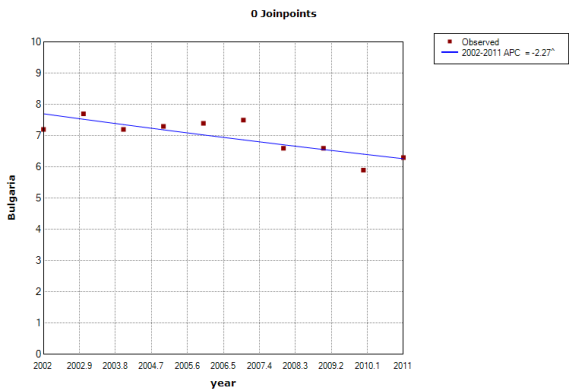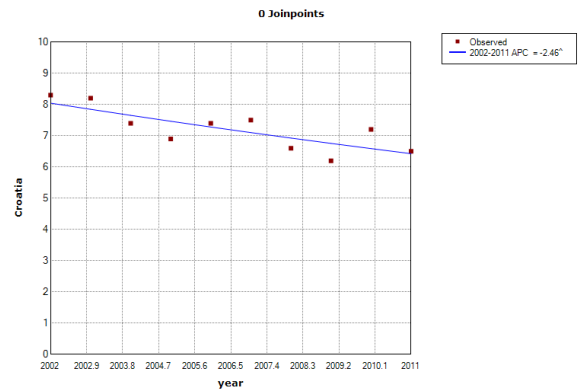

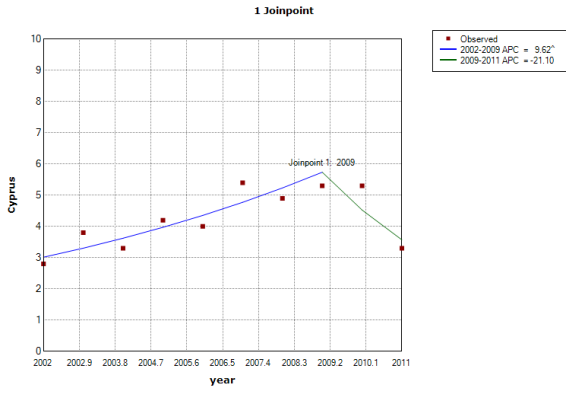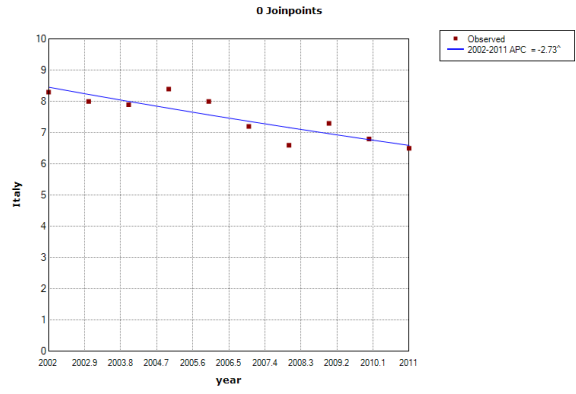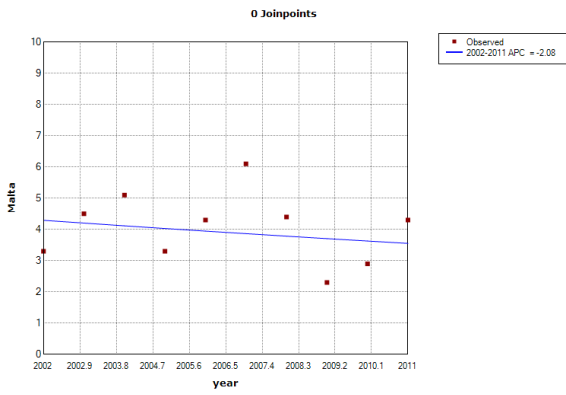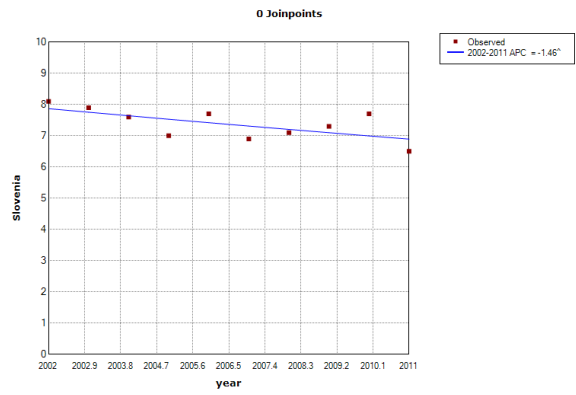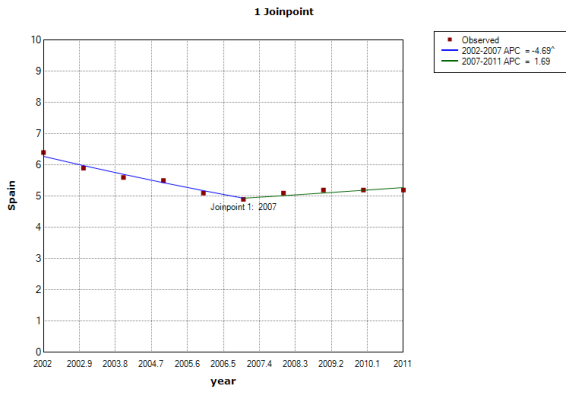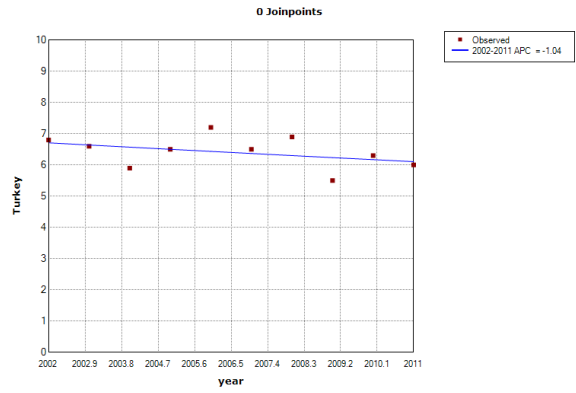

## Eastern Europe

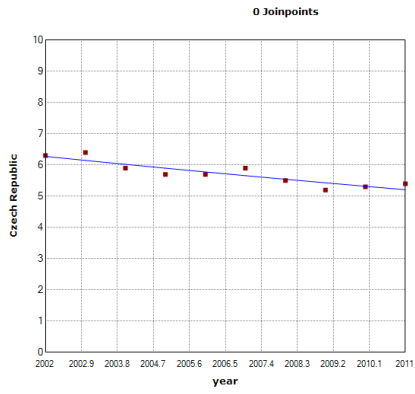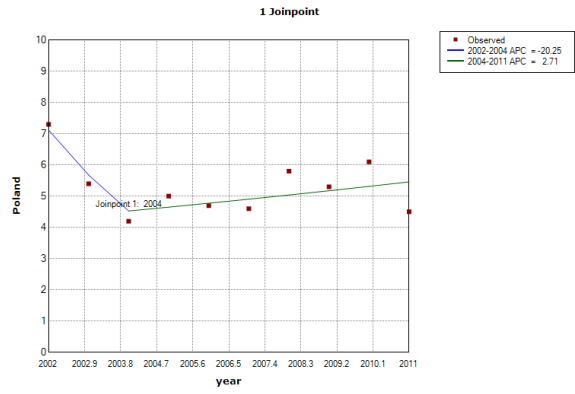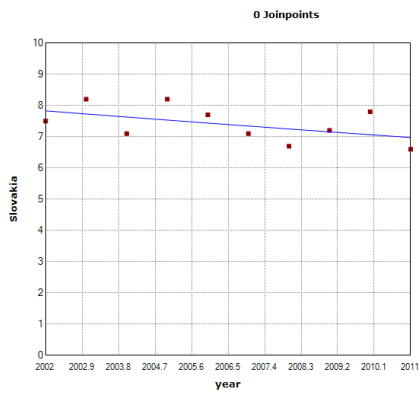

## Africa

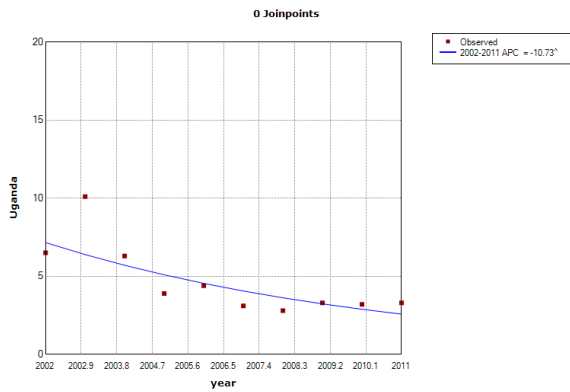

c.) Incidence male below 40 years old

Asia

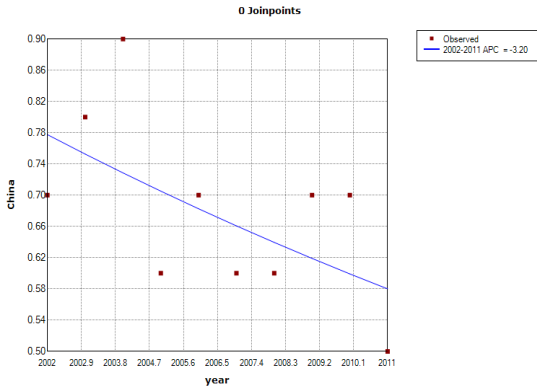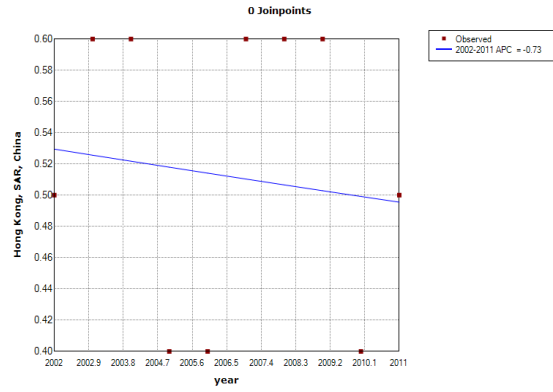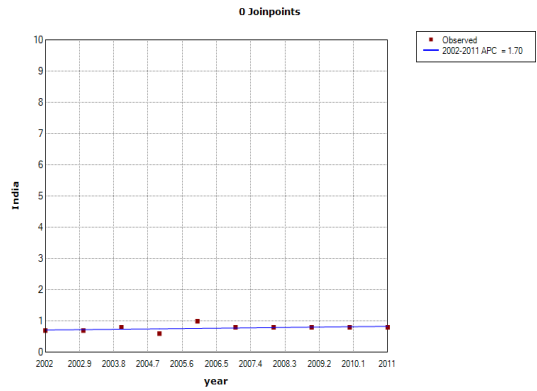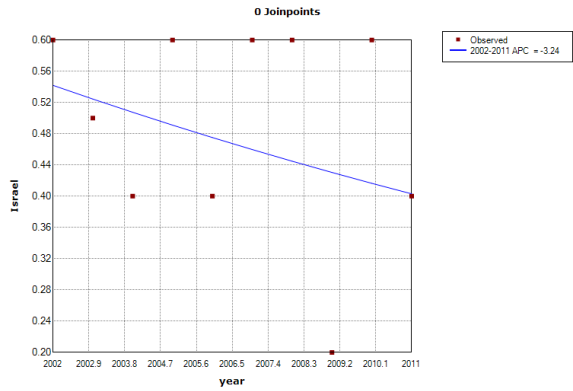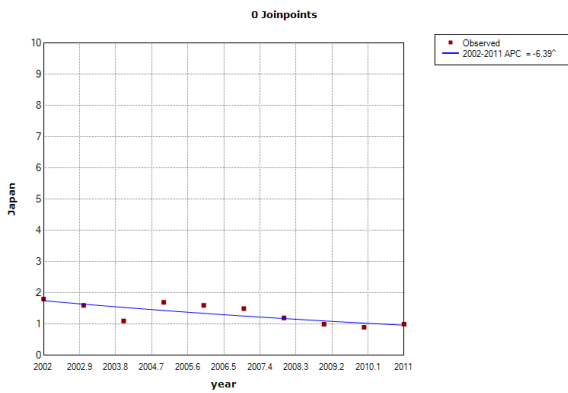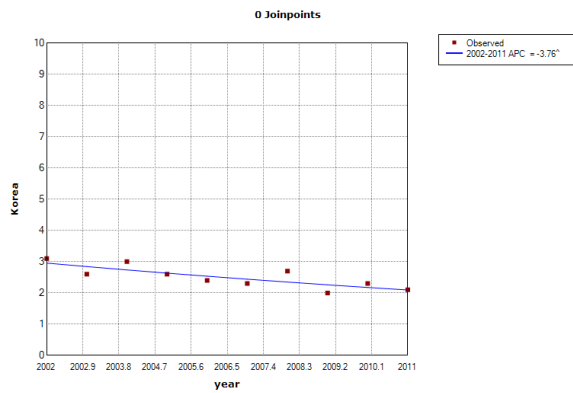



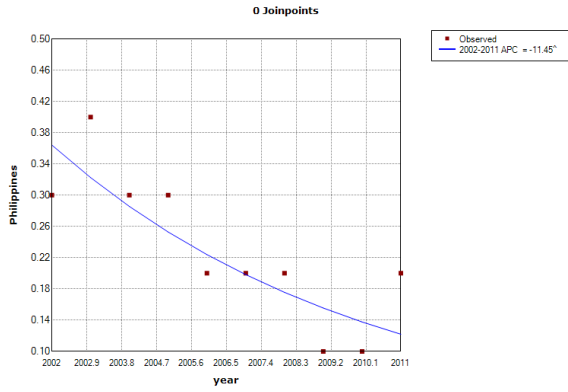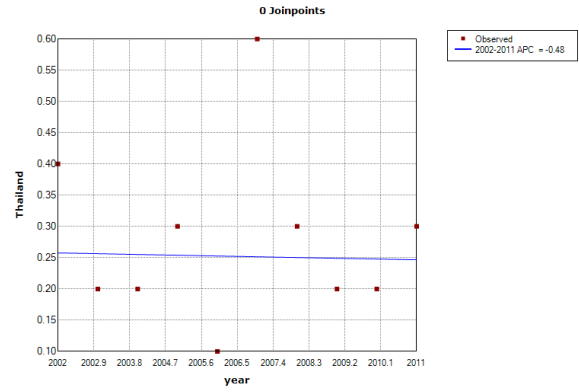

## Oceania

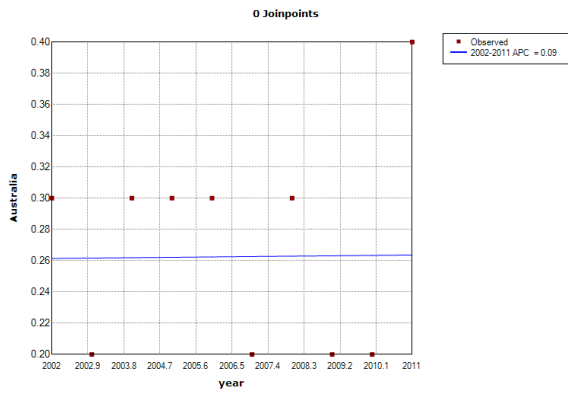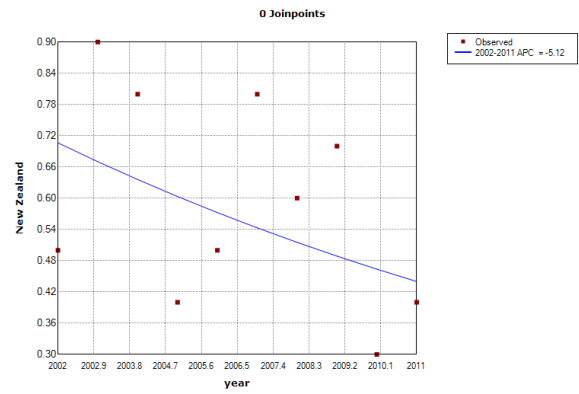

## Northern America

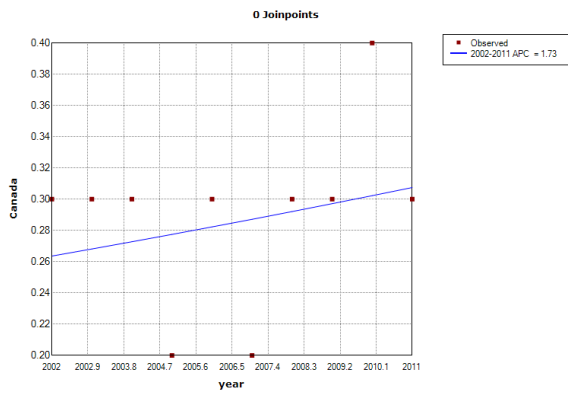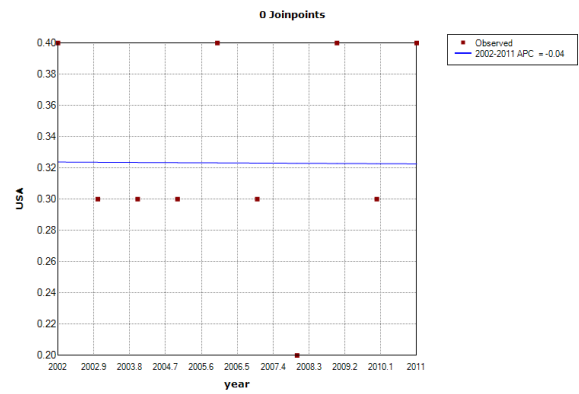

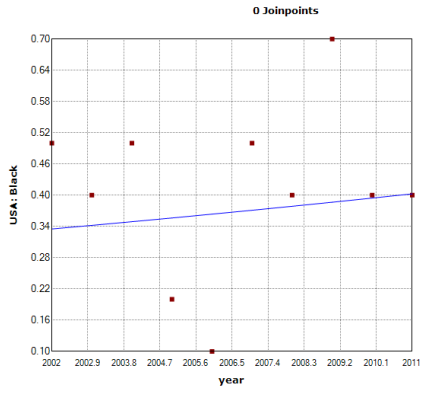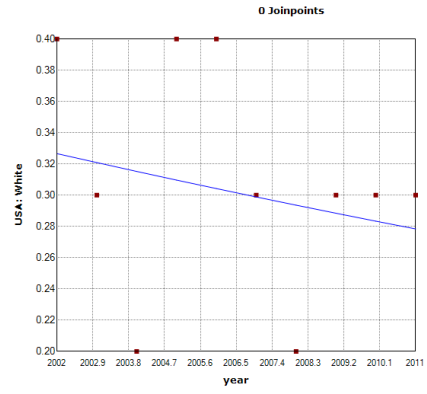

## Southern America

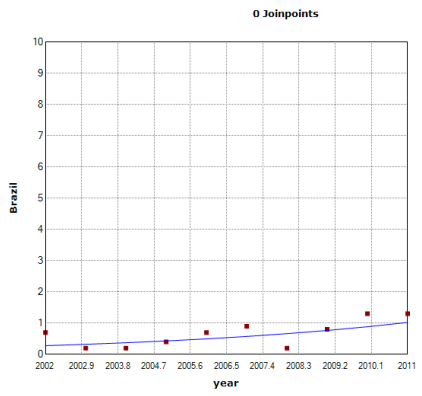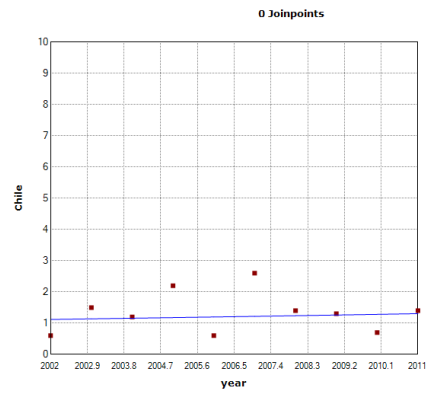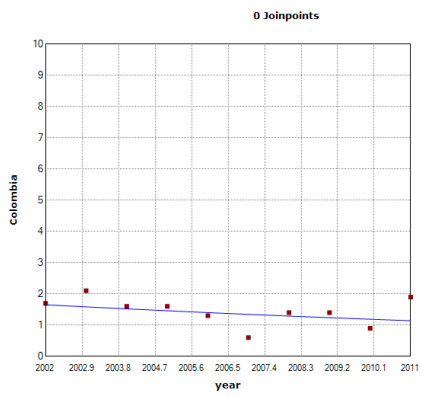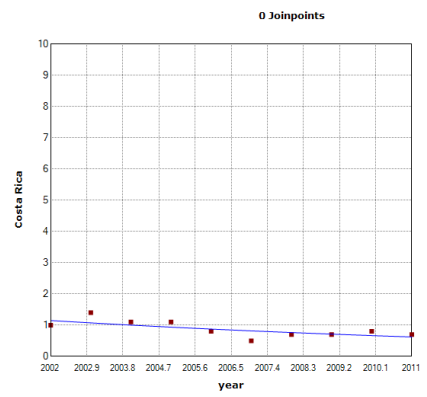

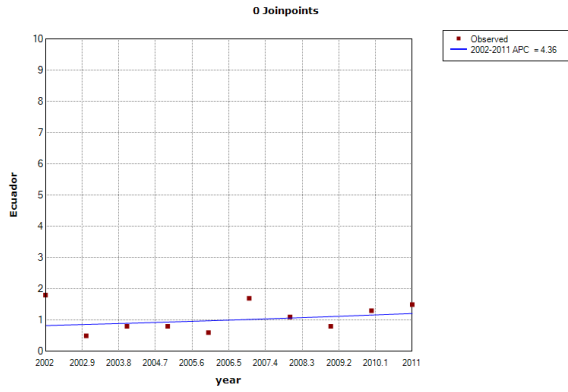

## Northern Europe

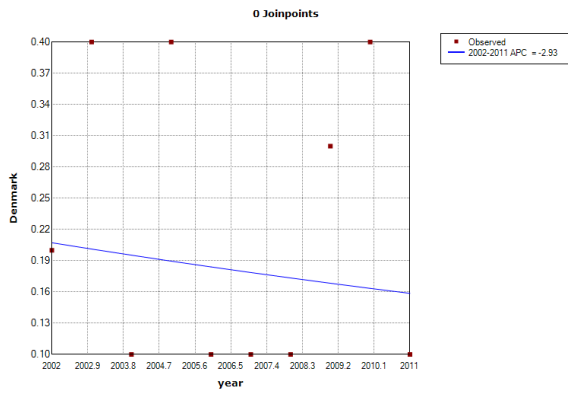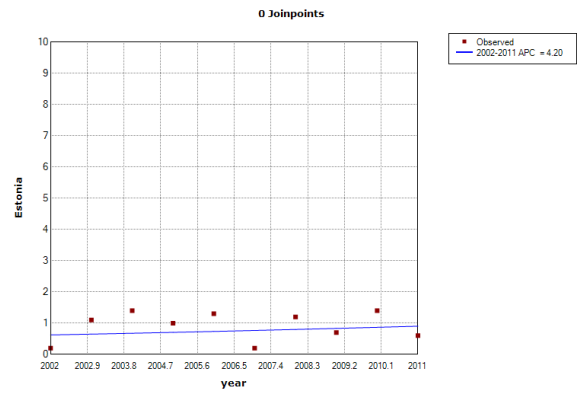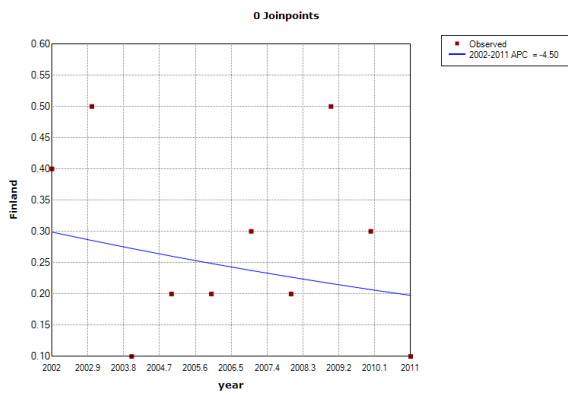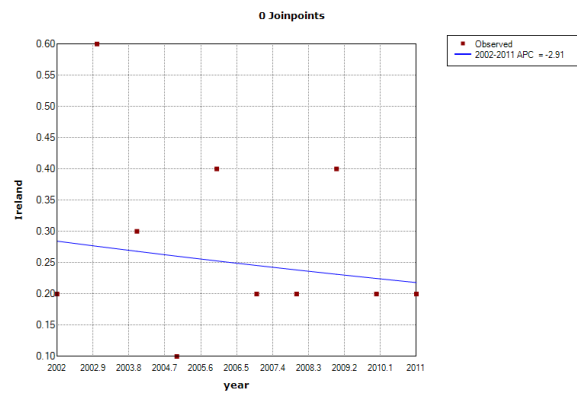

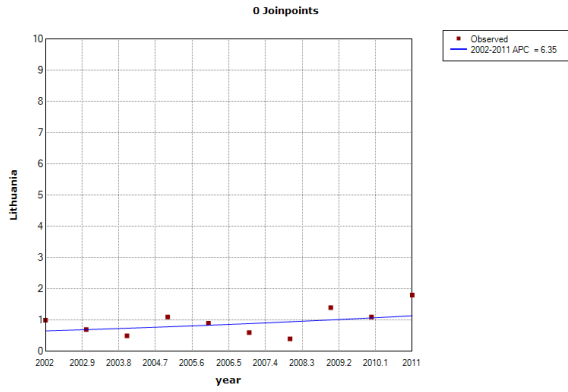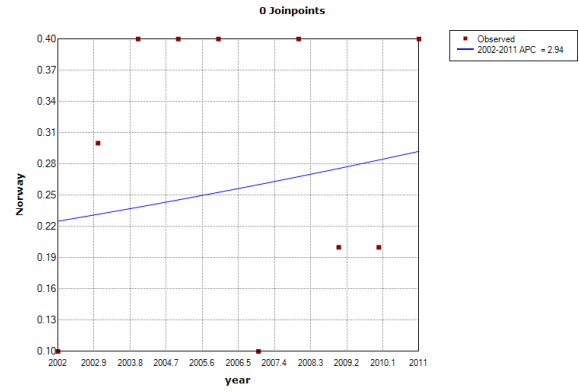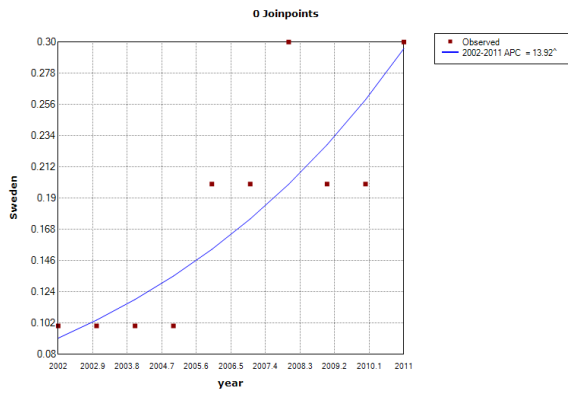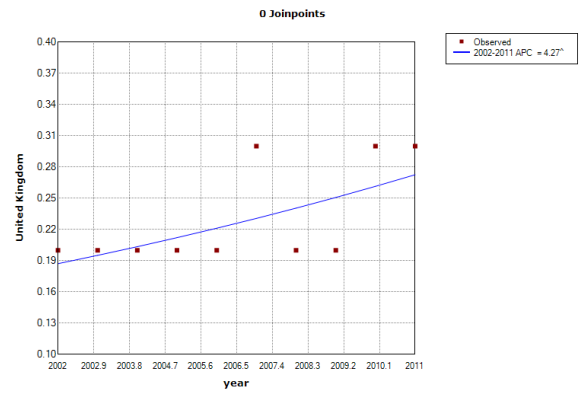

## Western Europe

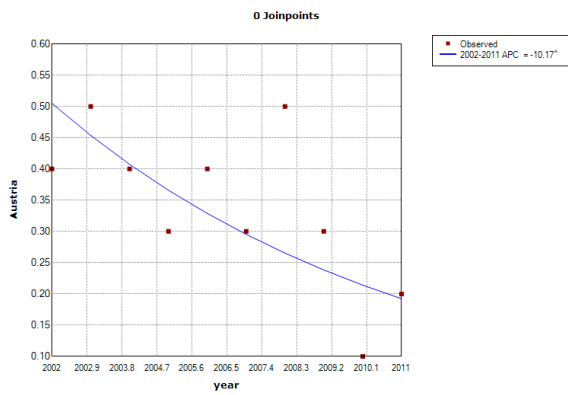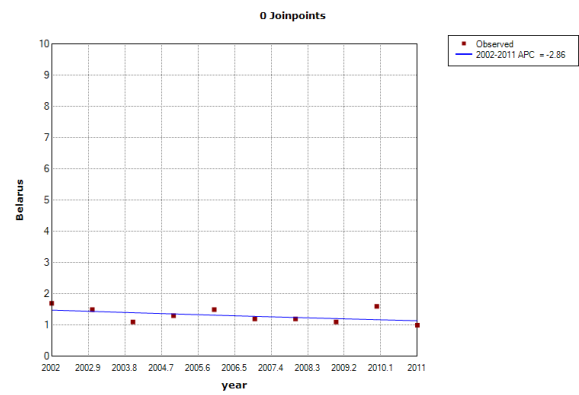

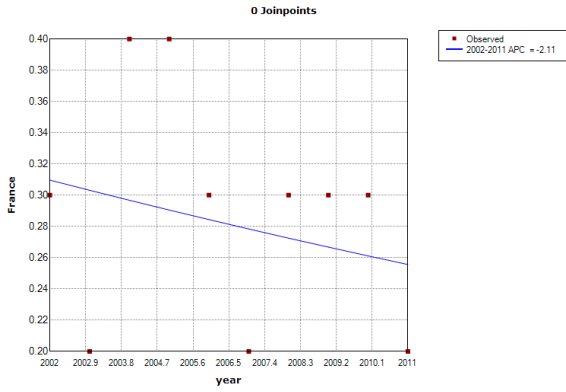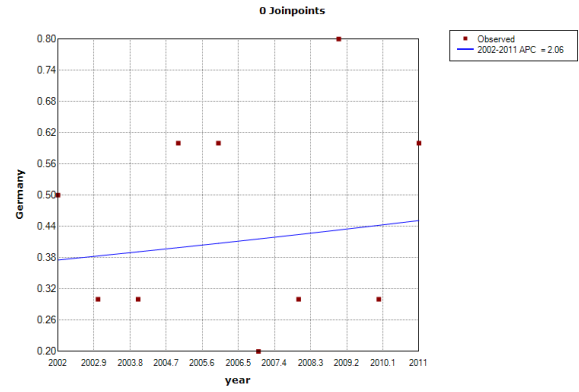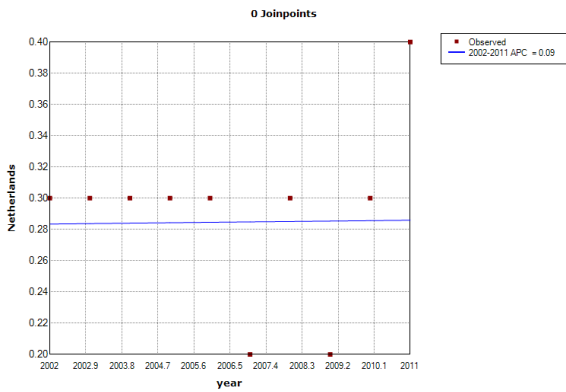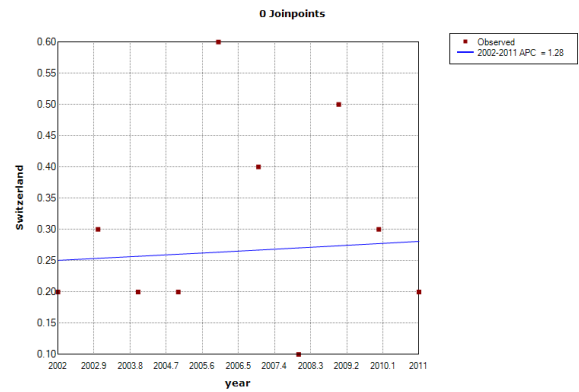

## Southern Europe

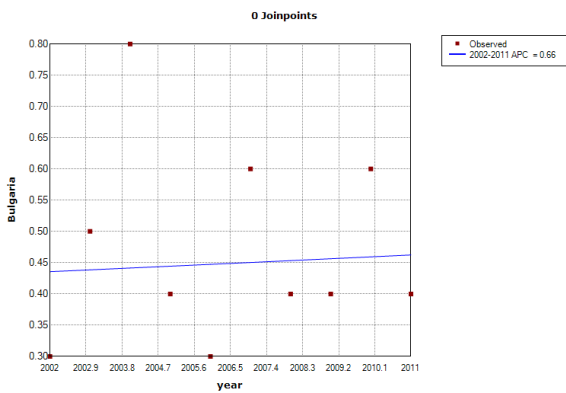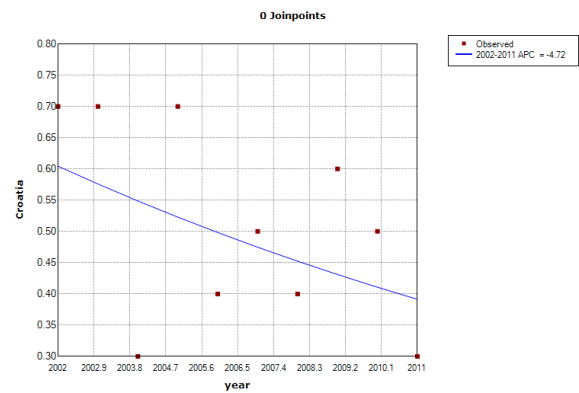

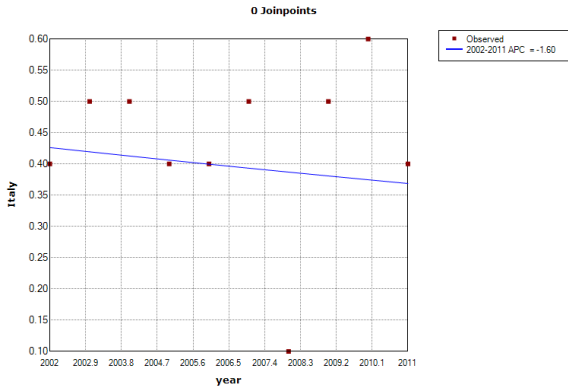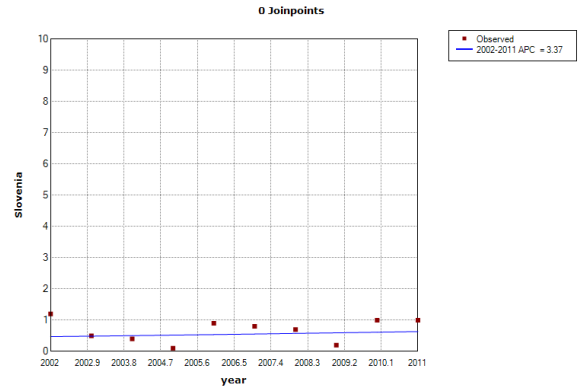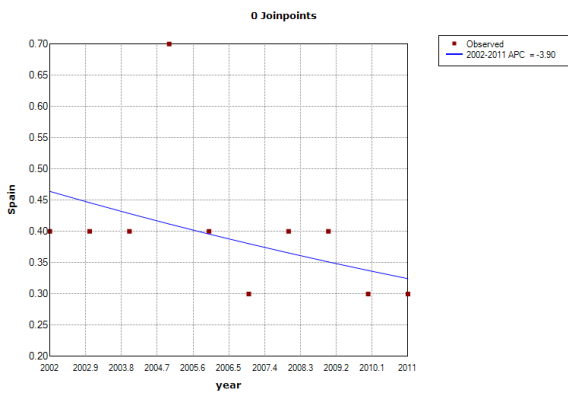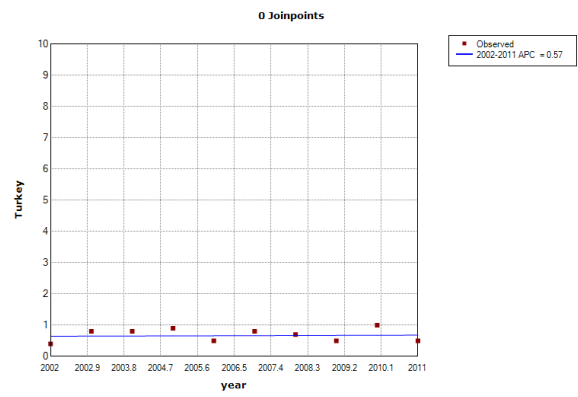

## Eastern Europe

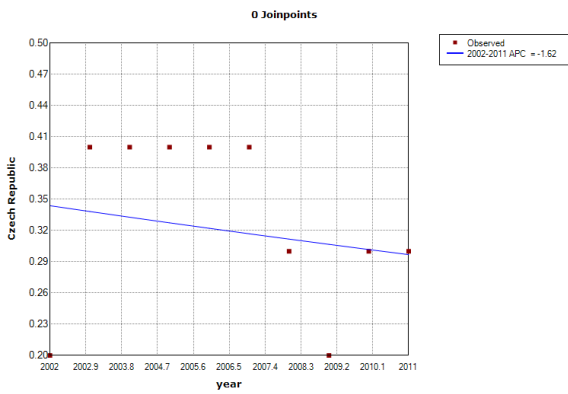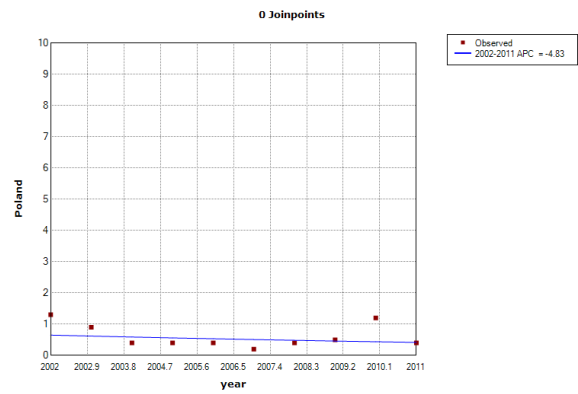

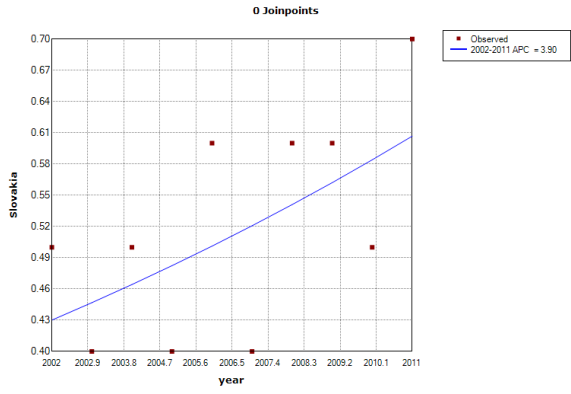

## Africa

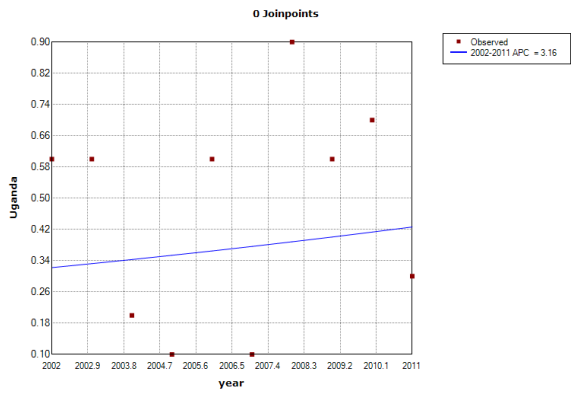

d.) Incidence female below 40 years old

Asia

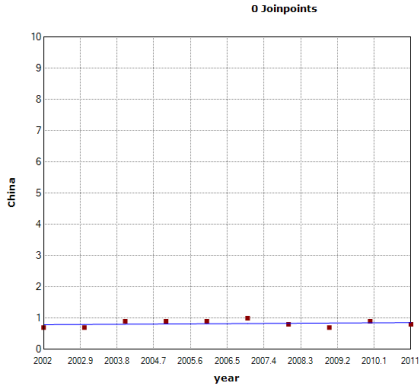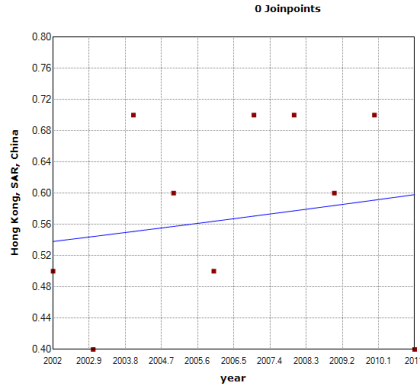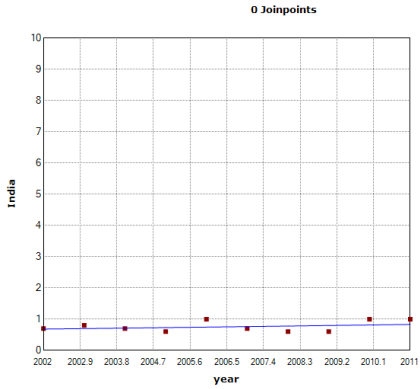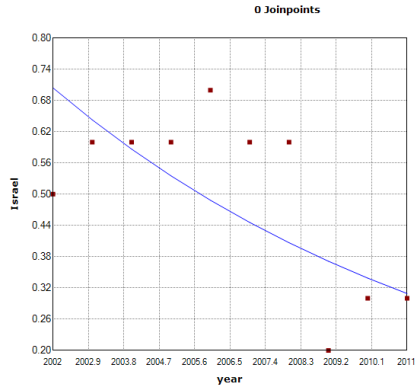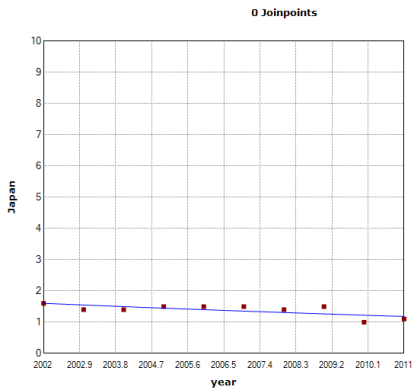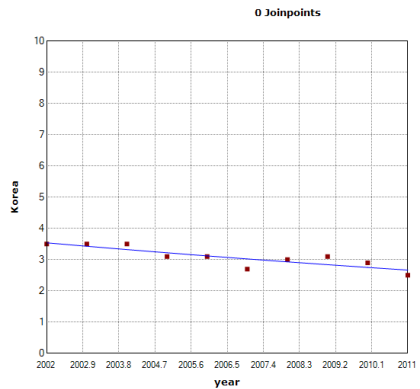



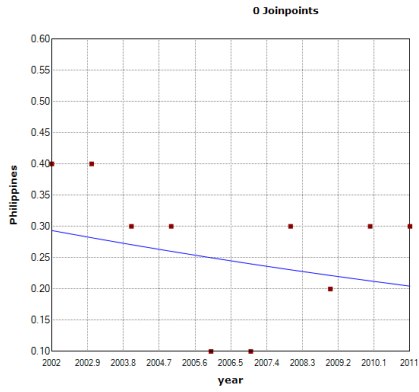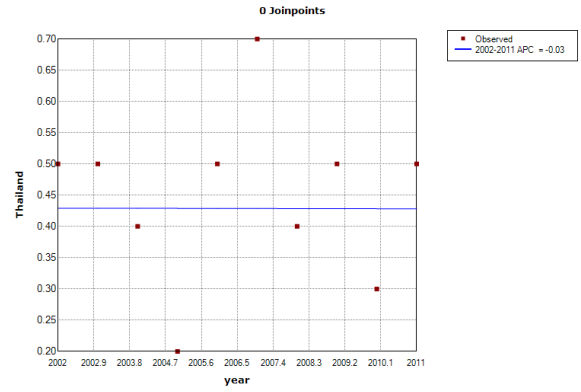

## Oceania

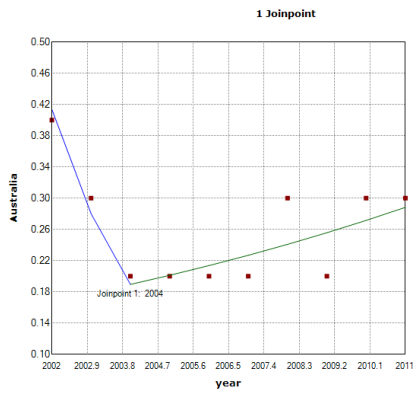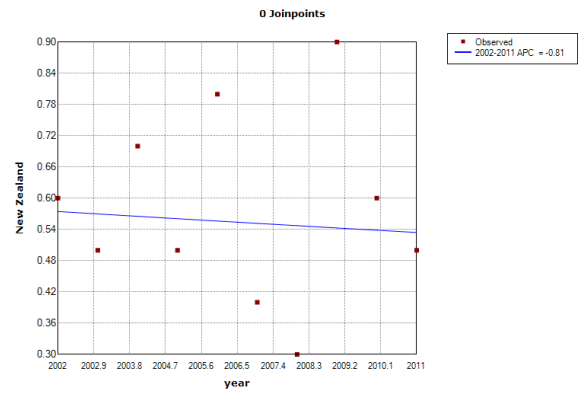

## Northern America

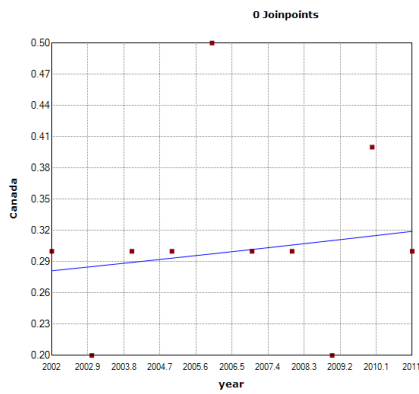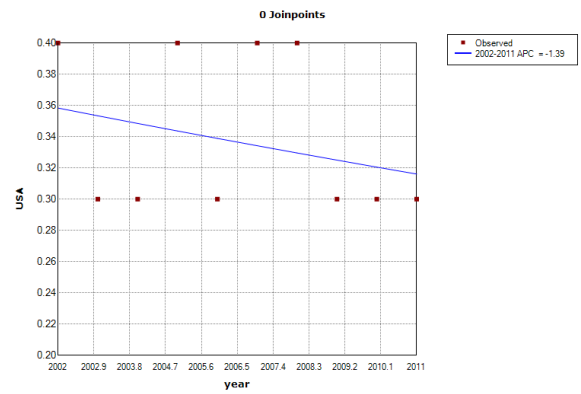

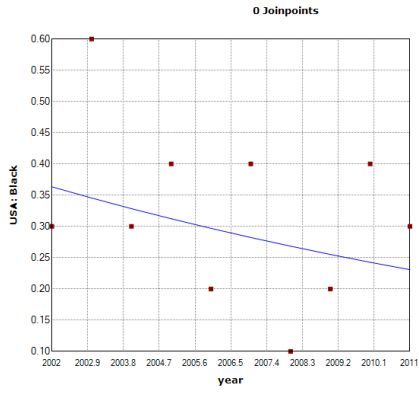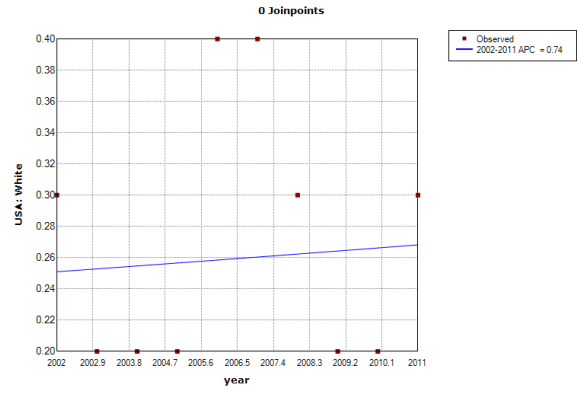

## Southern America

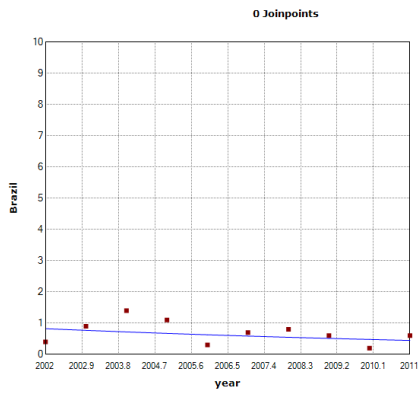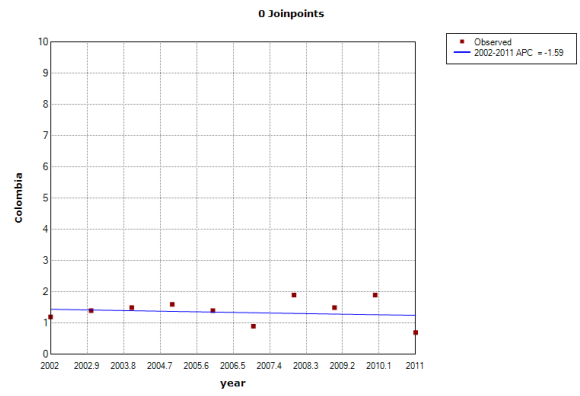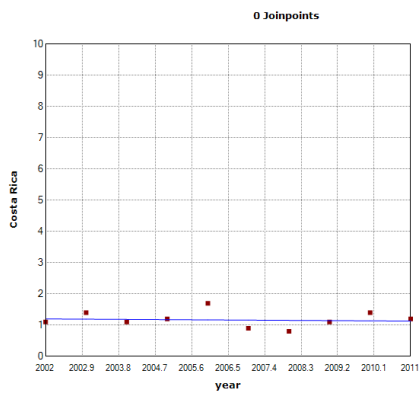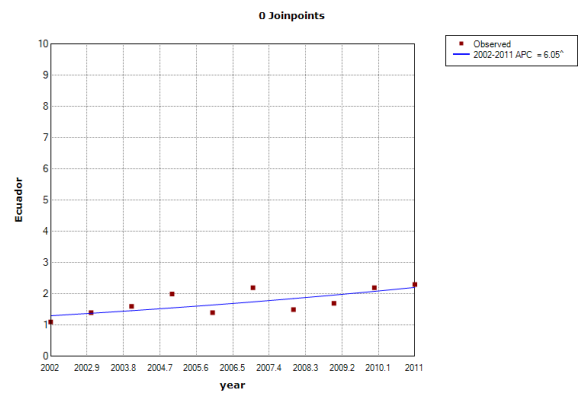

# Northern Europe

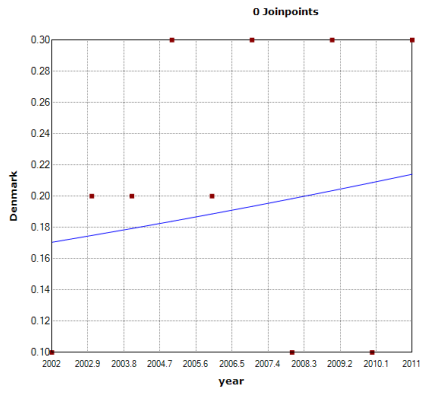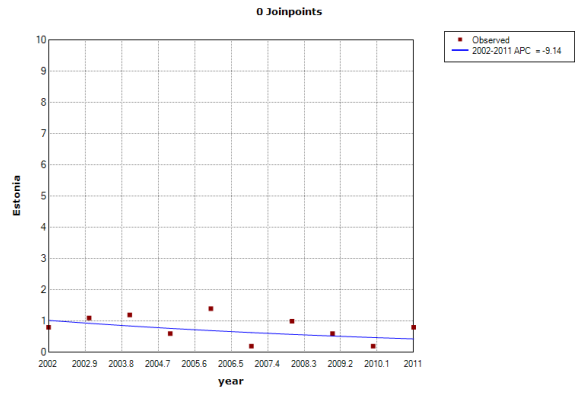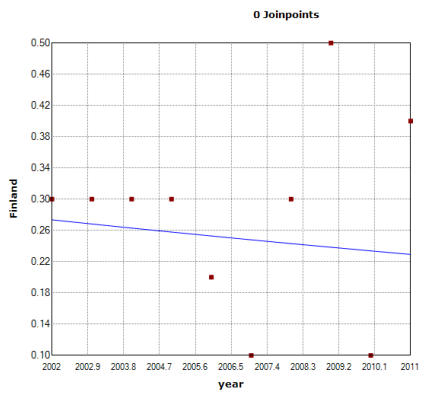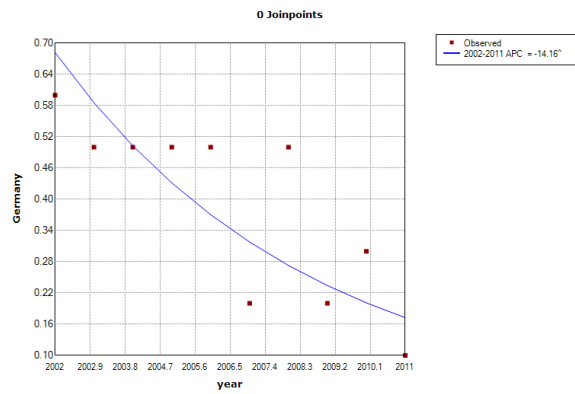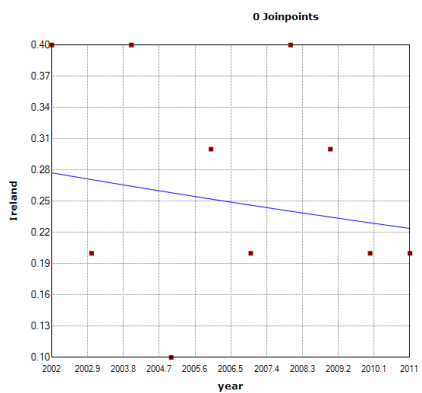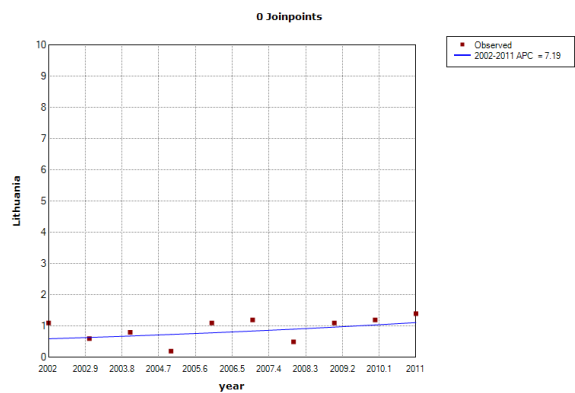

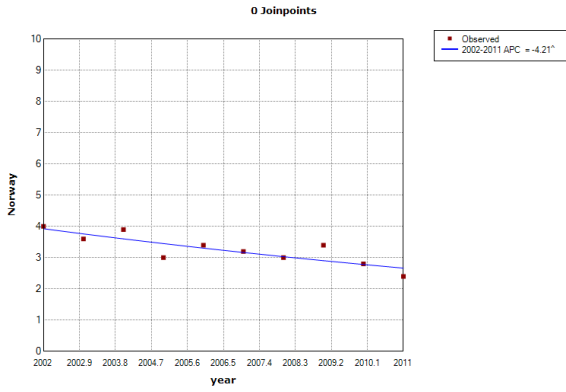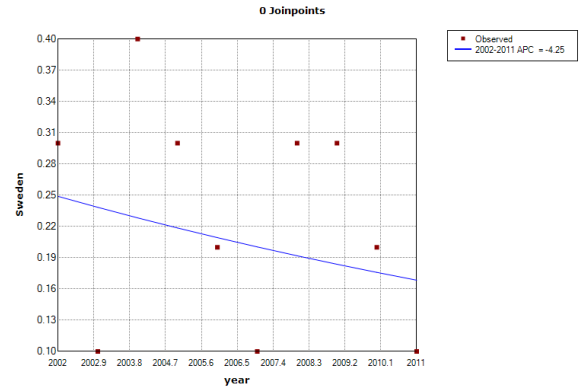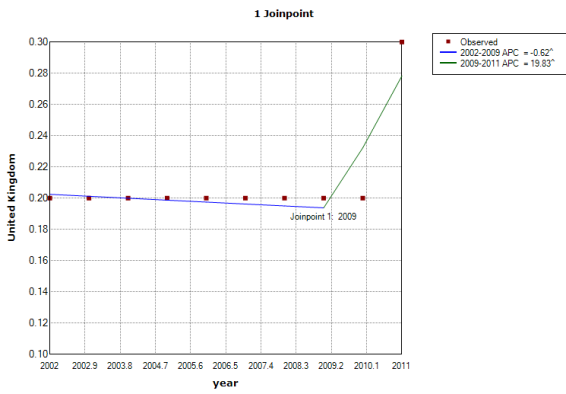

## Western Europe

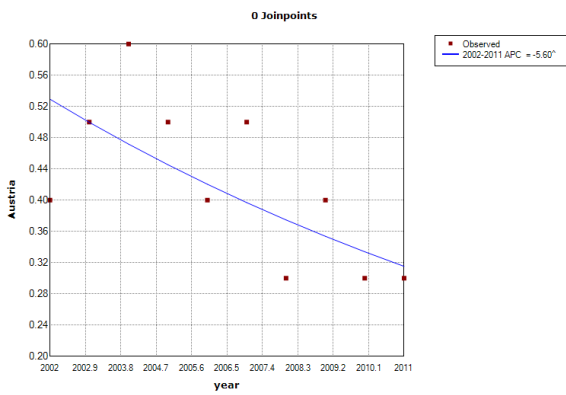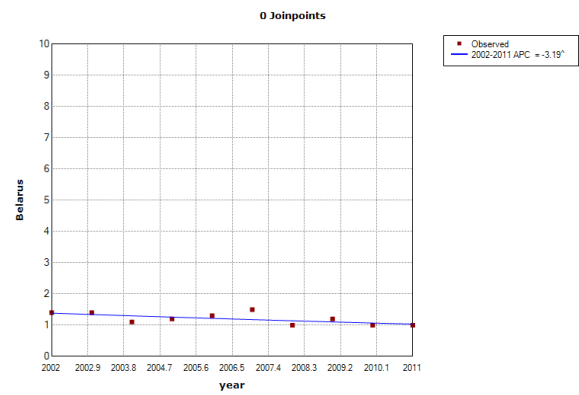

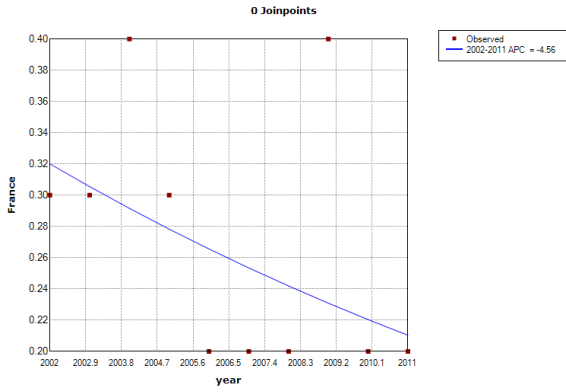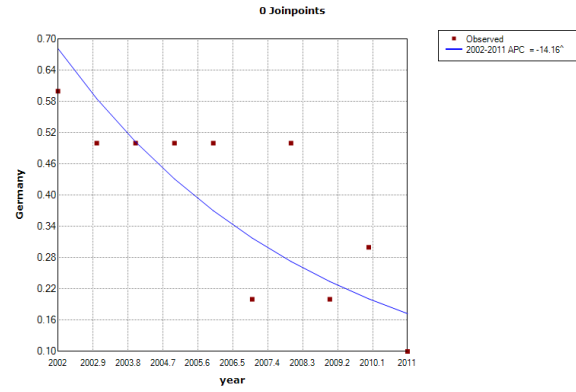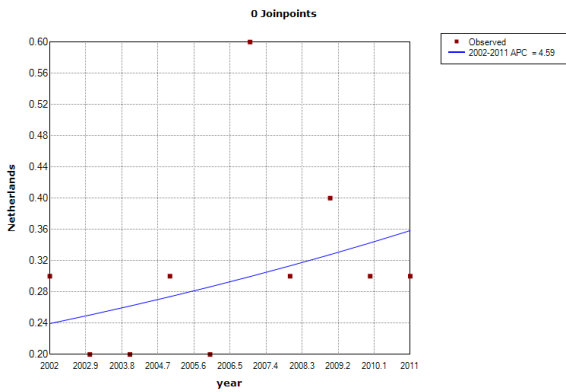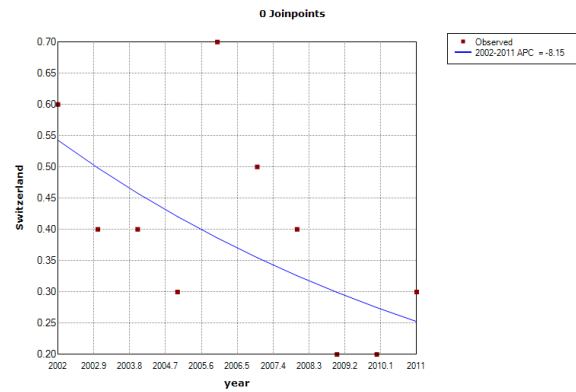

## Southern Europe

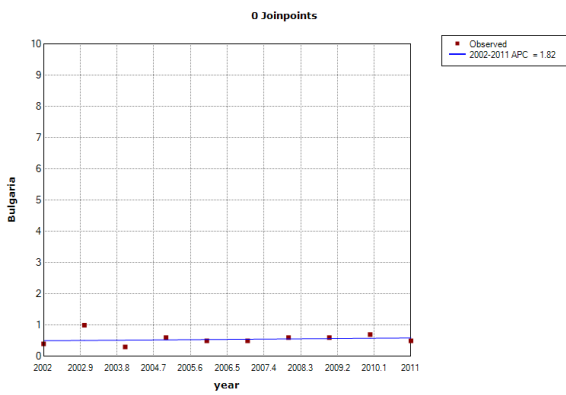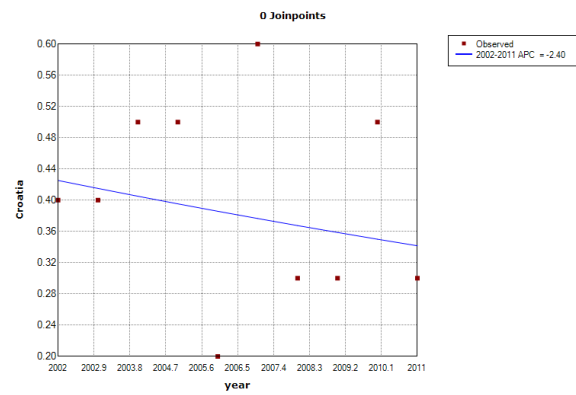

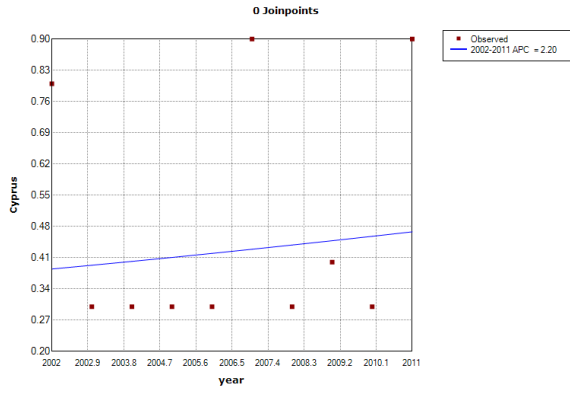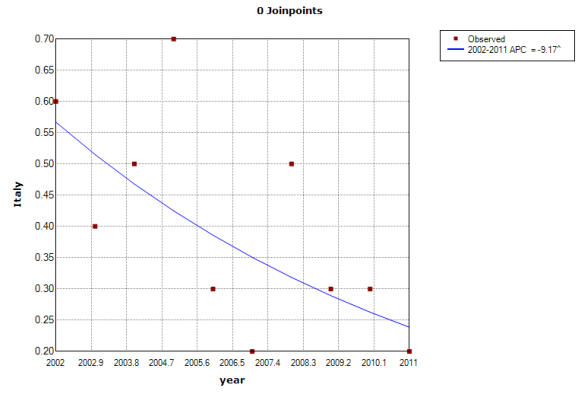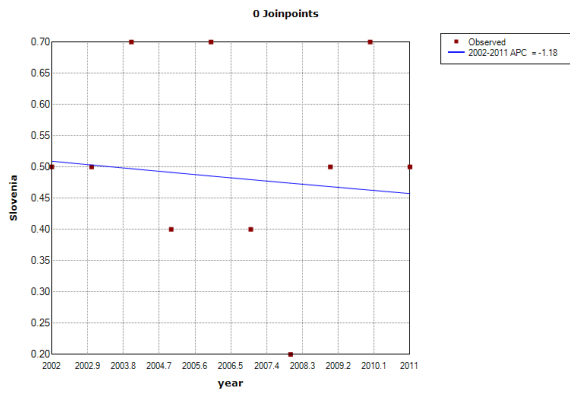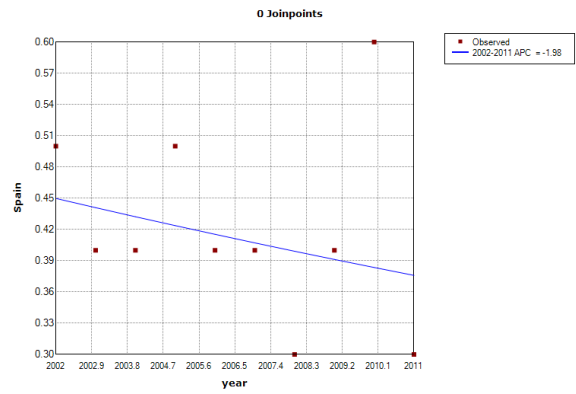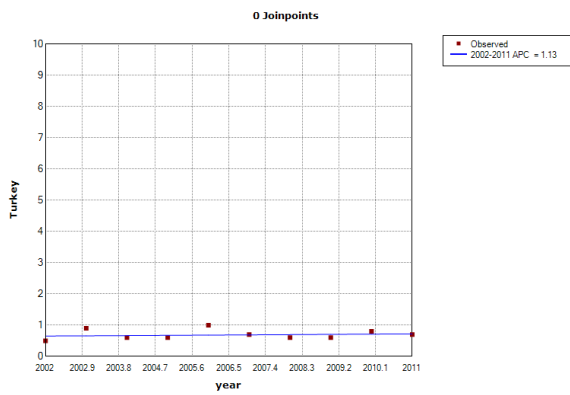

# Eastern Europe

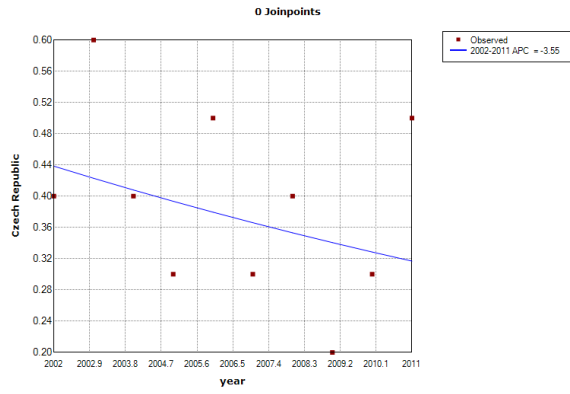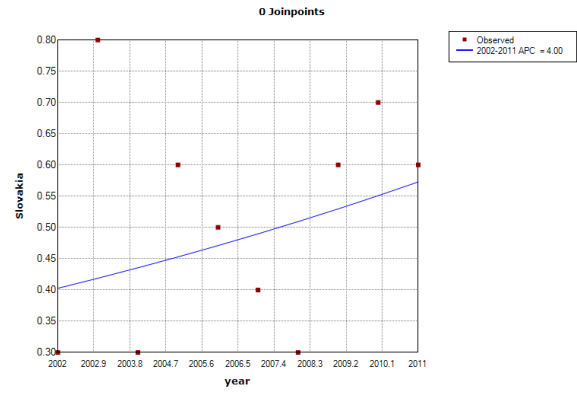

e.) Incidence male above 40 years old

Asia

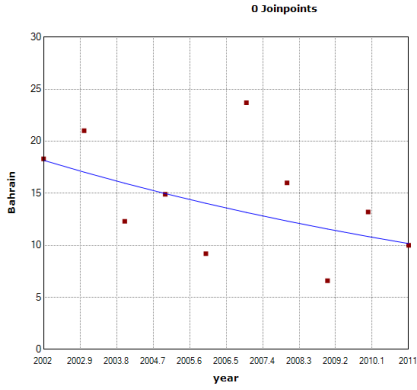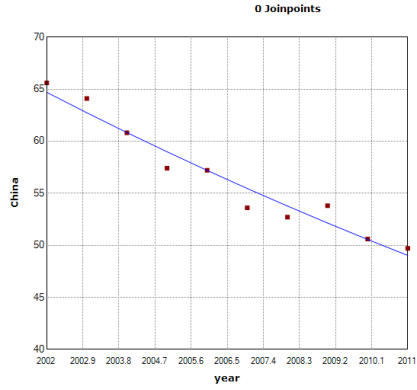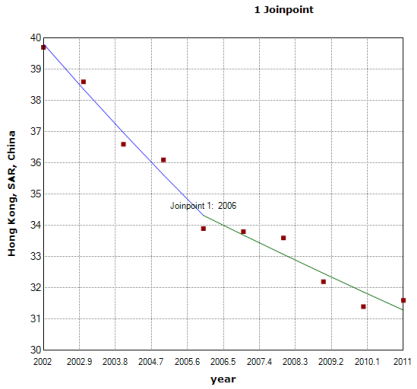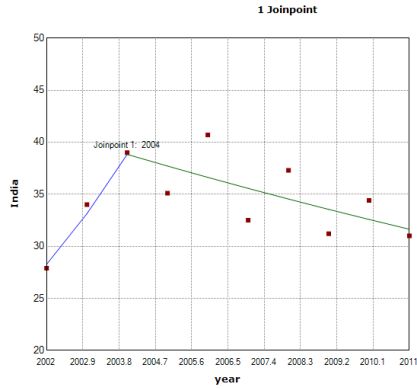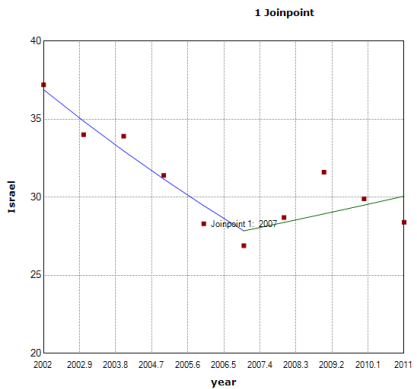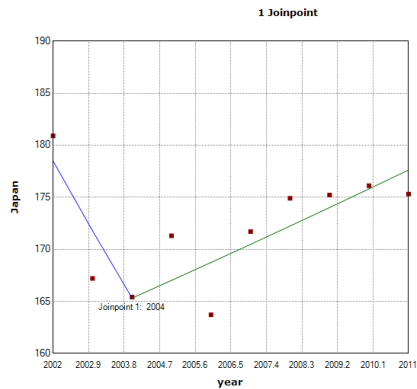



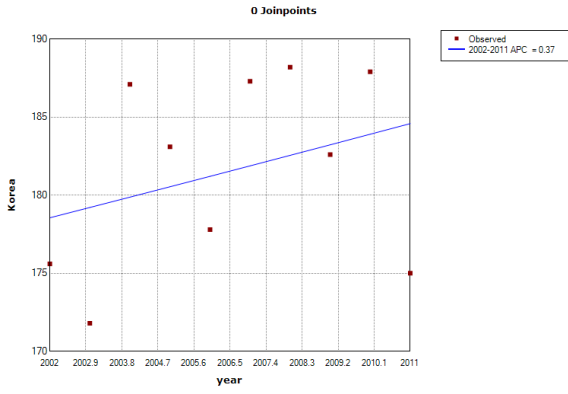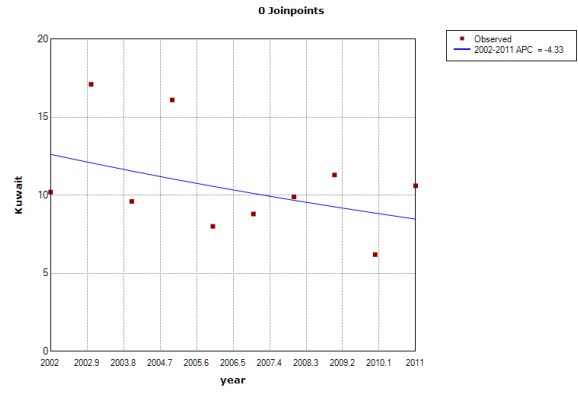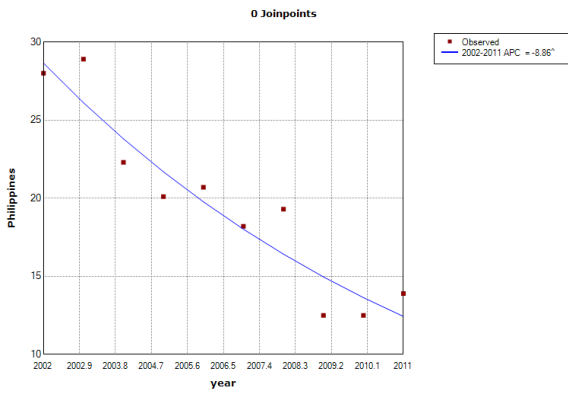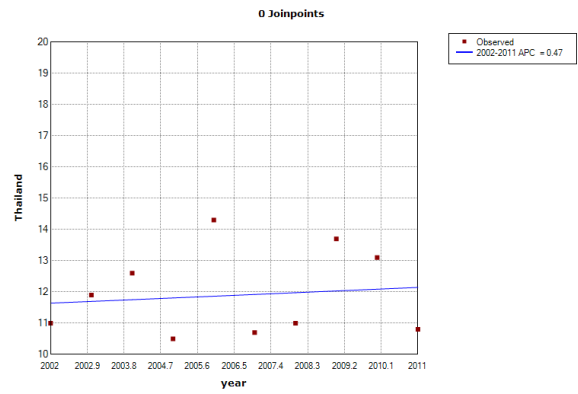

## Oceania

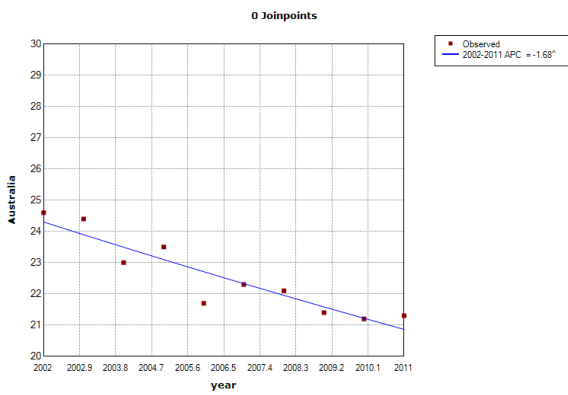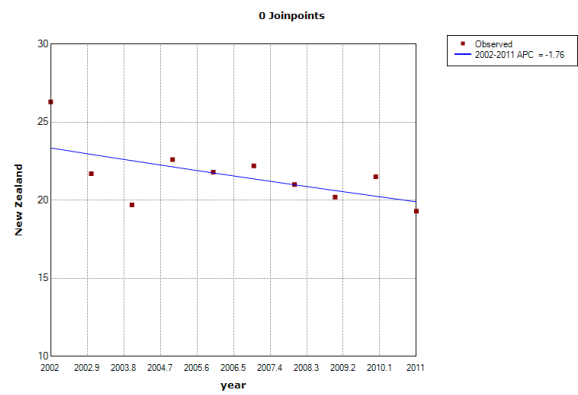

## Northern America

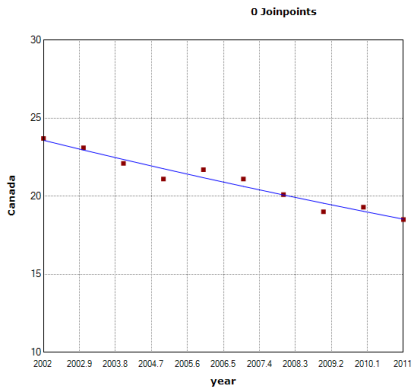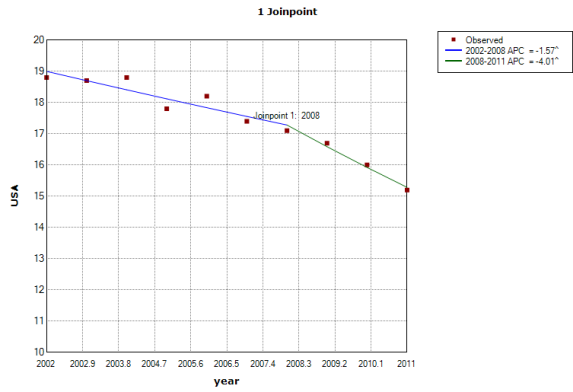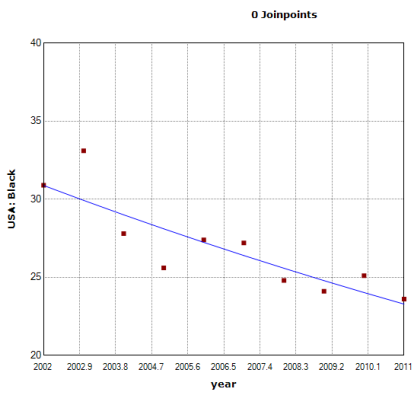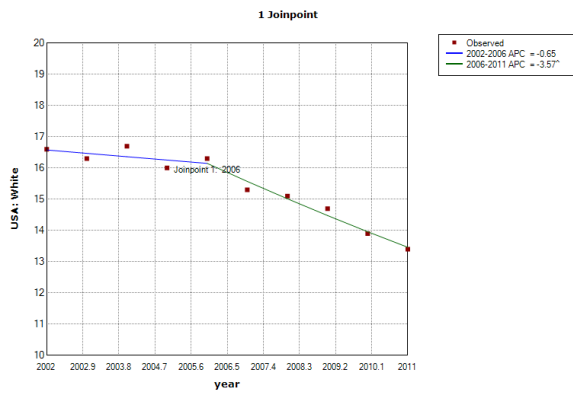

## Southern America

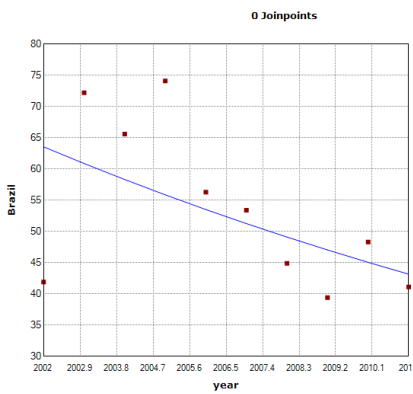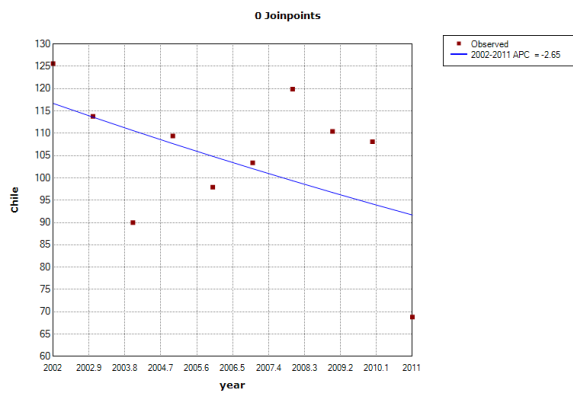

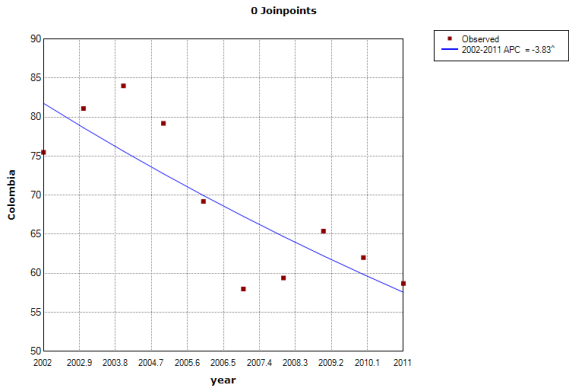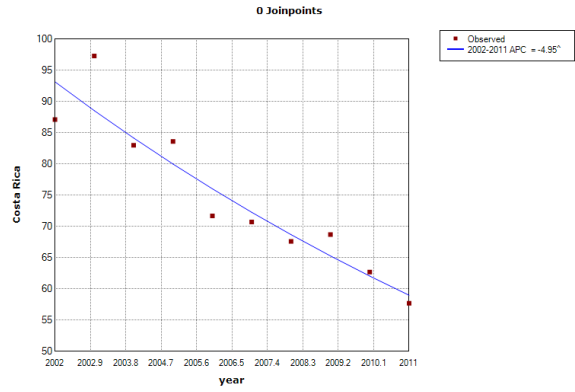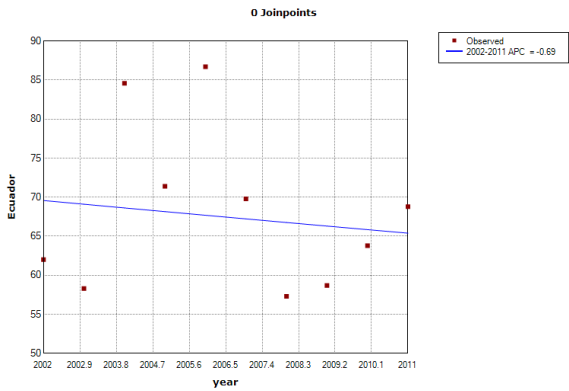

## Northern Europe

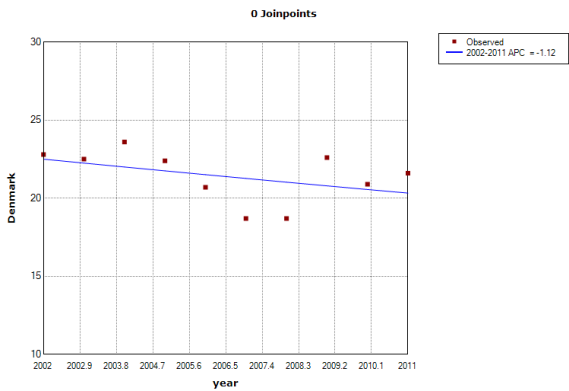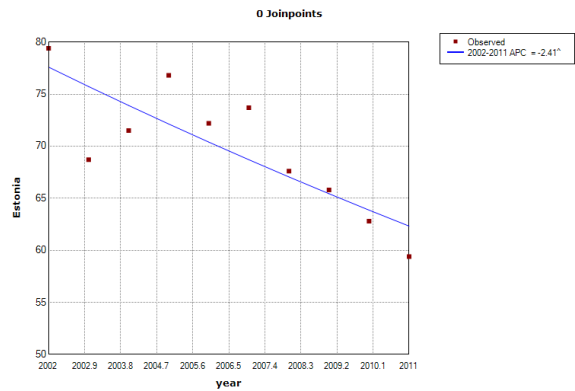

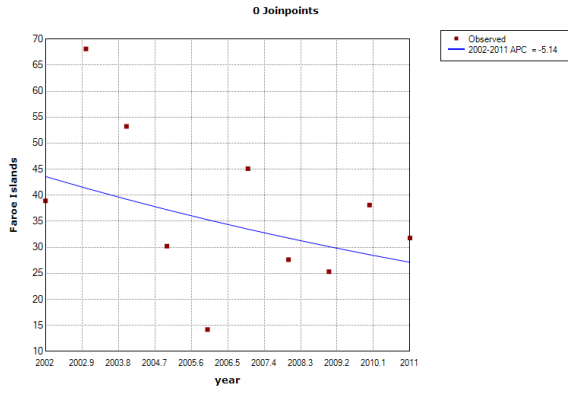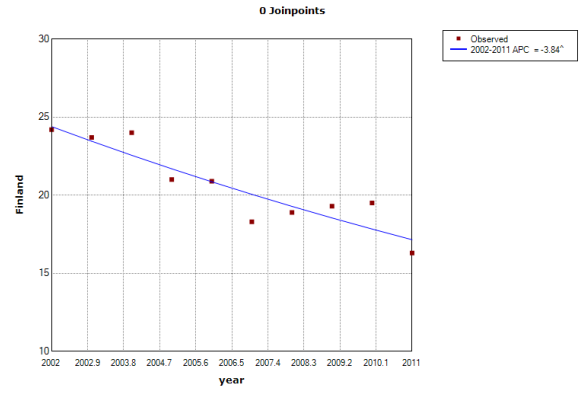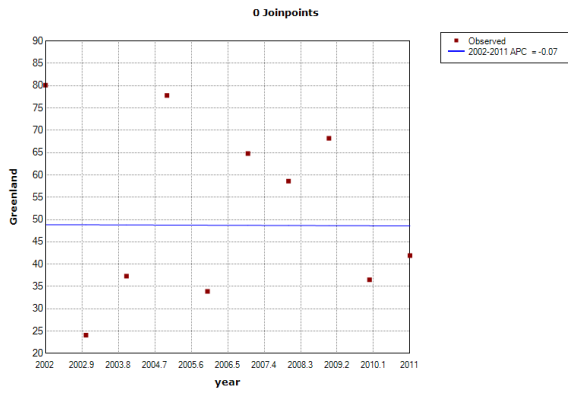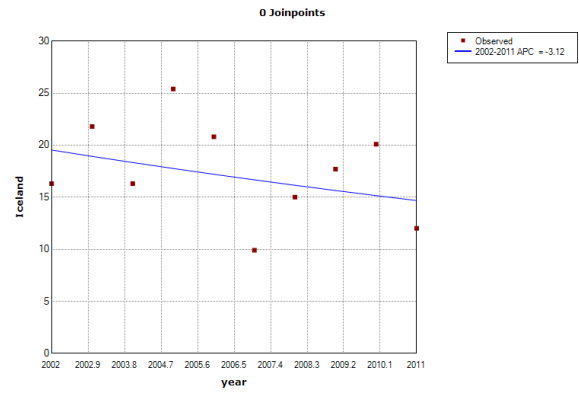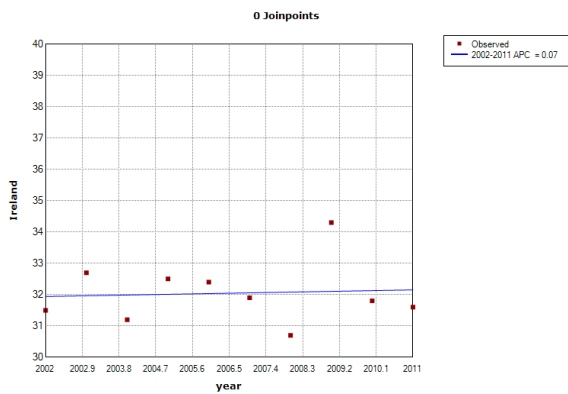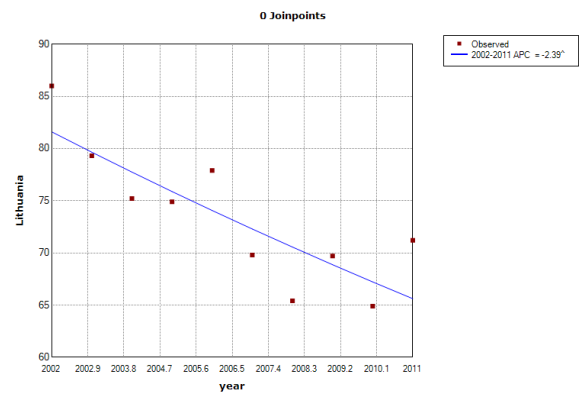

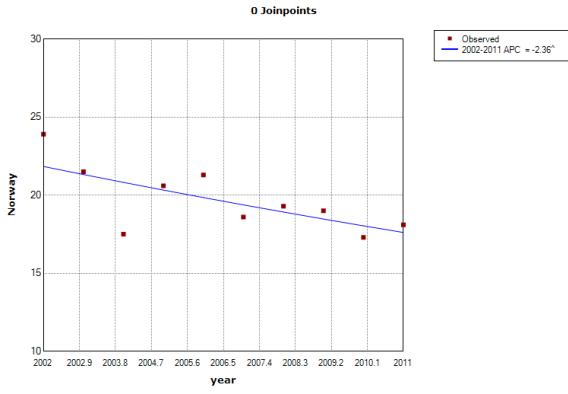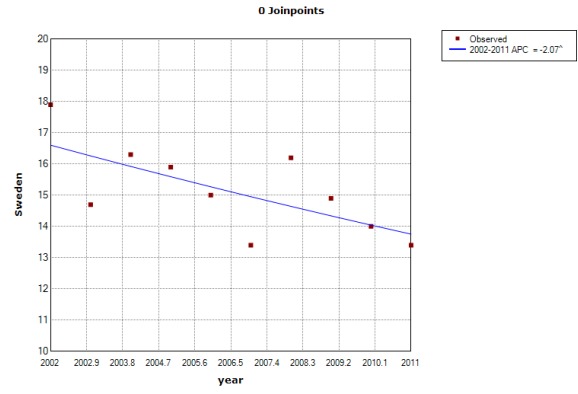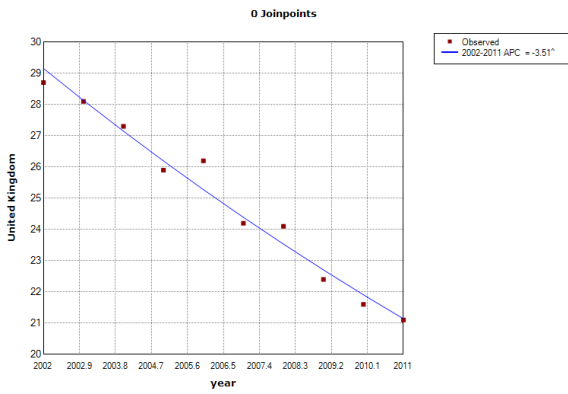

## Western Europe

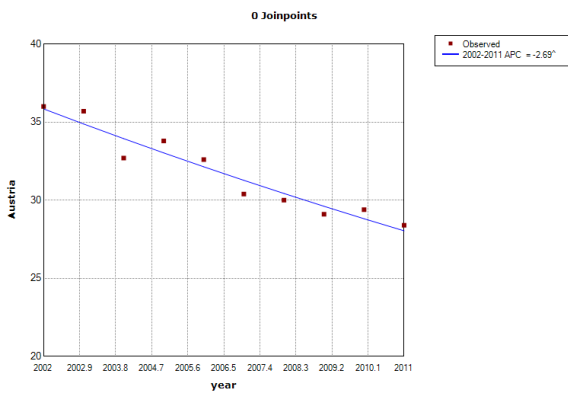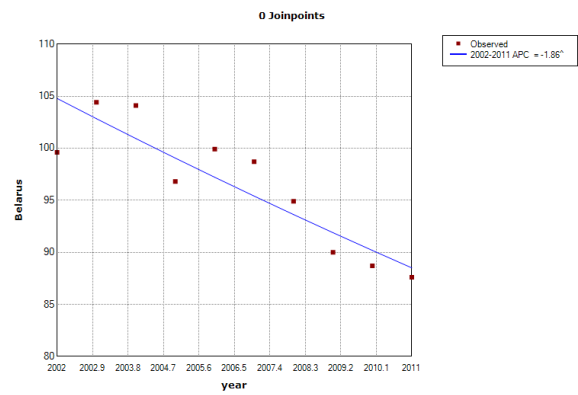

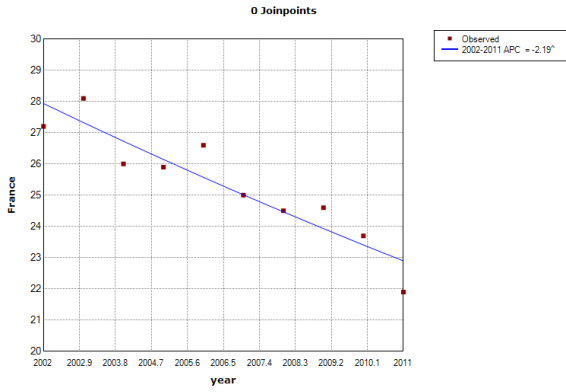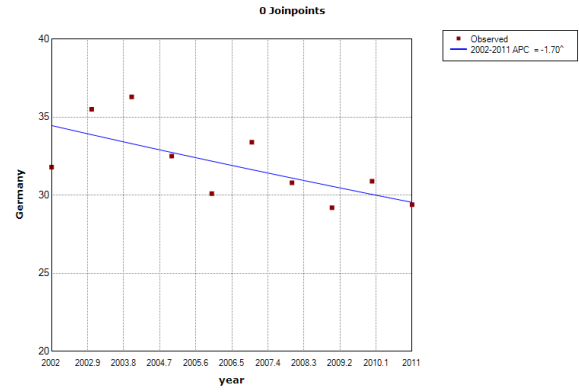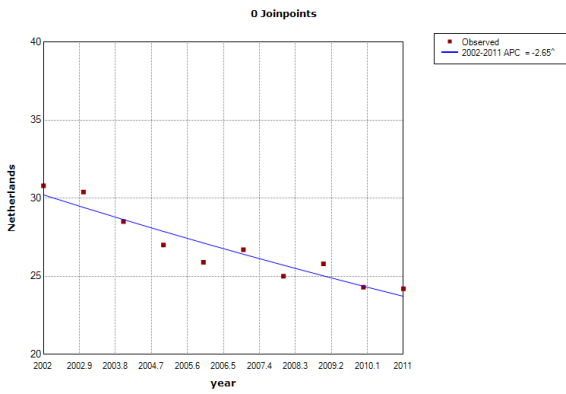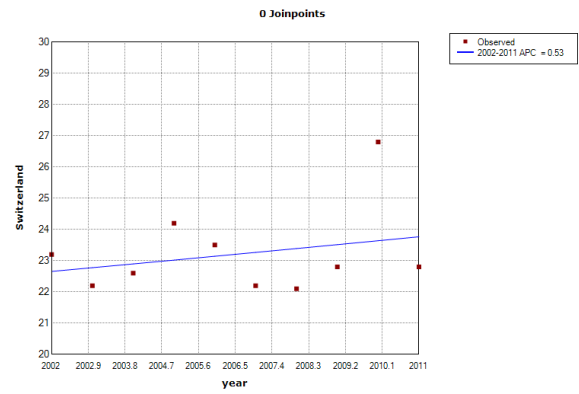

## Southern Europe

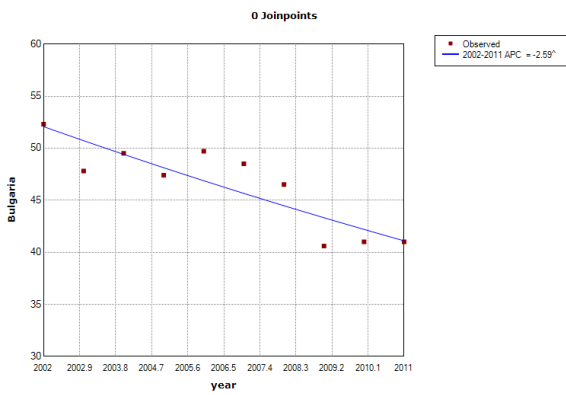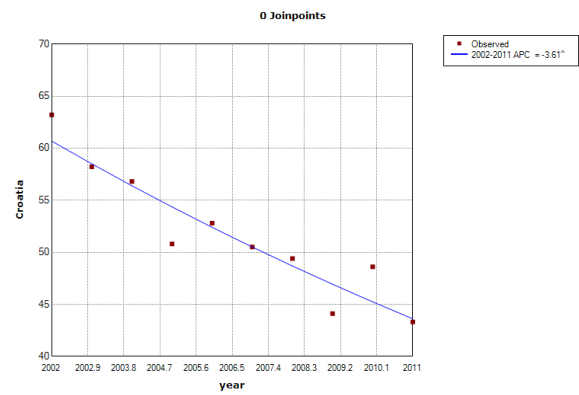

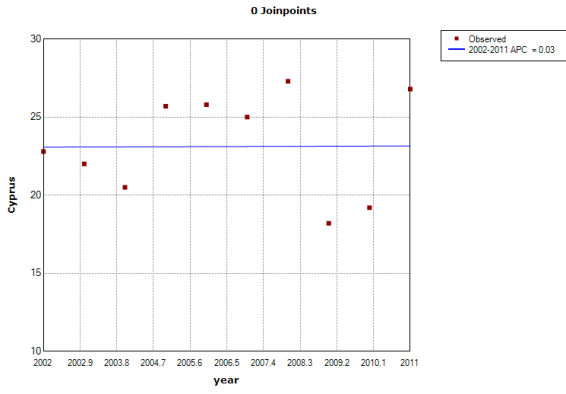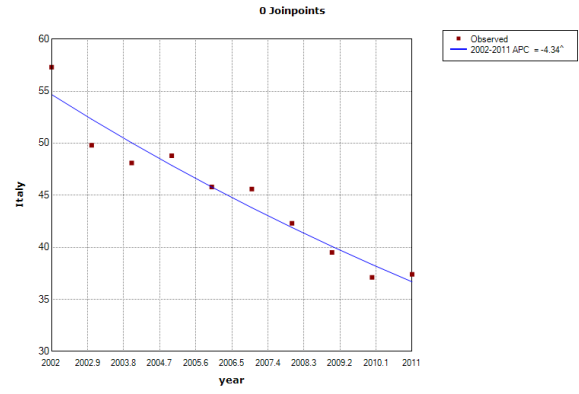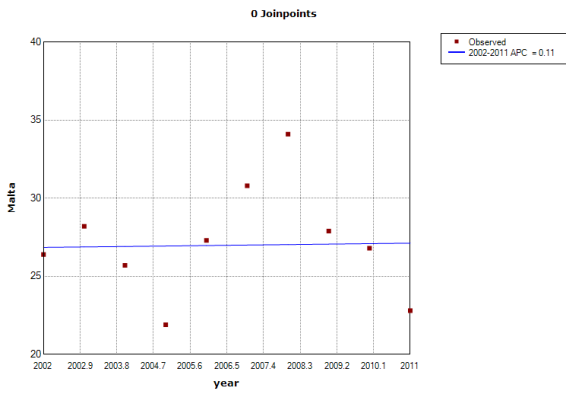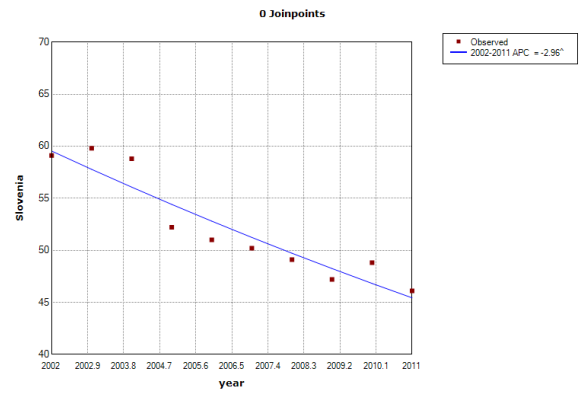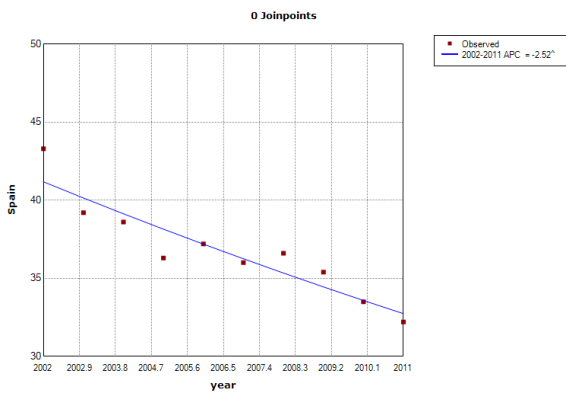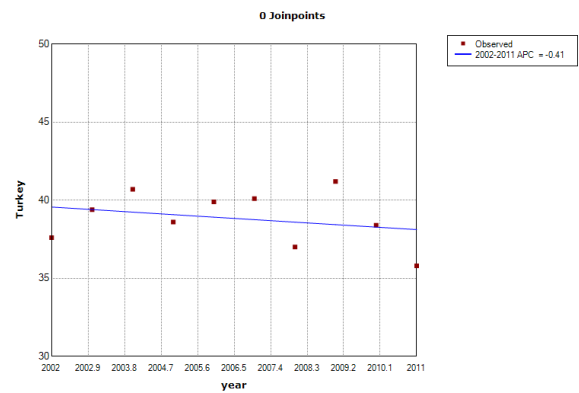

## Eastern Europe

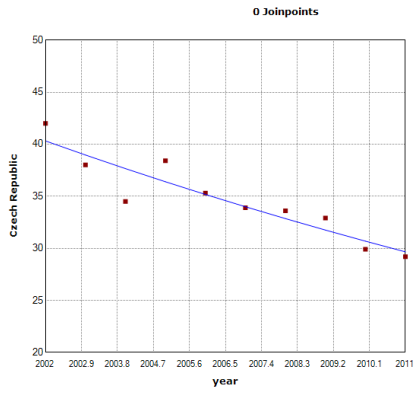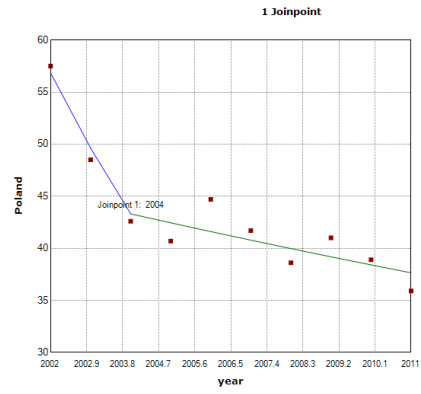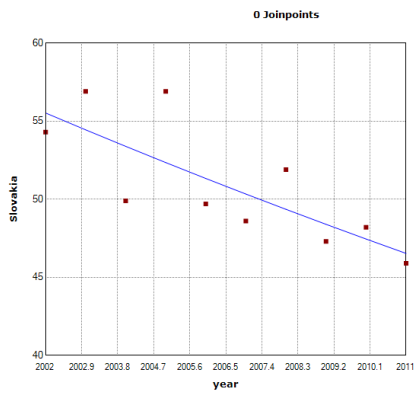

## Africa

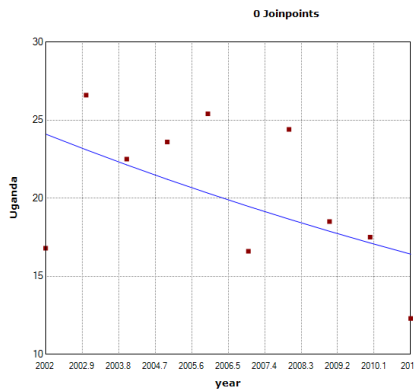



f.) Incidence female above 40 years old

## Asia

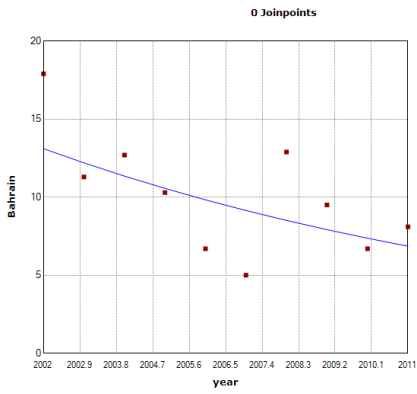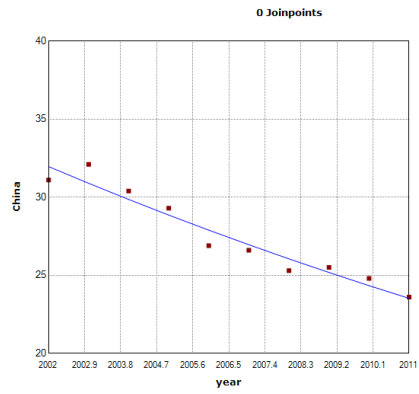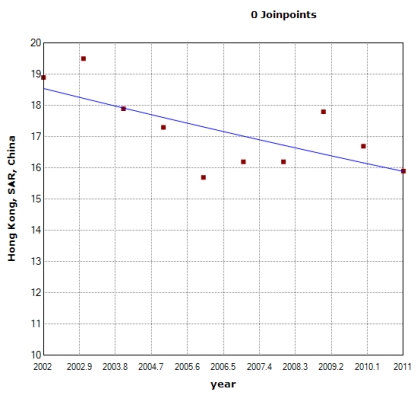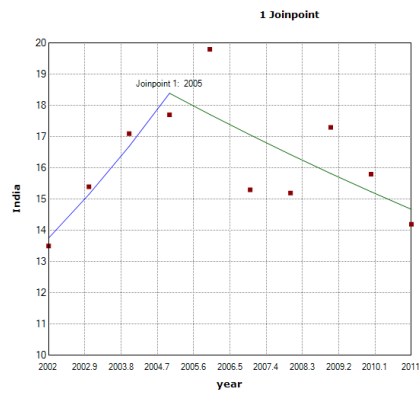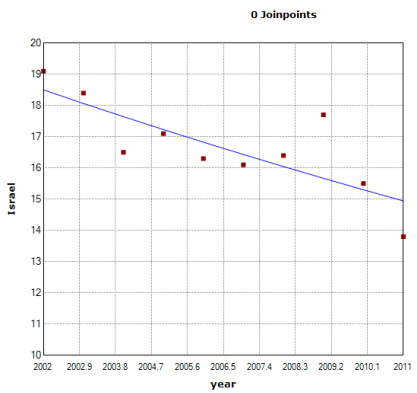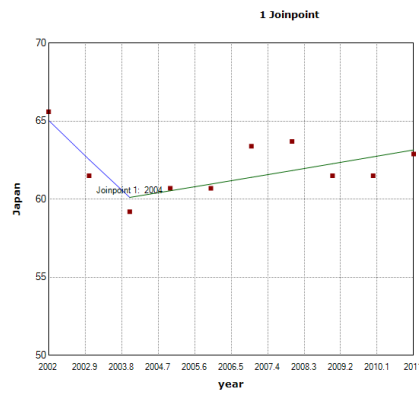

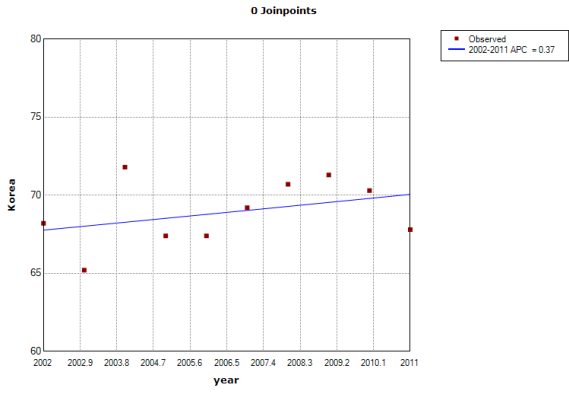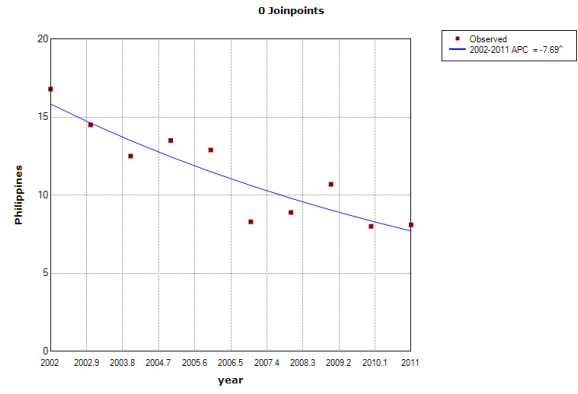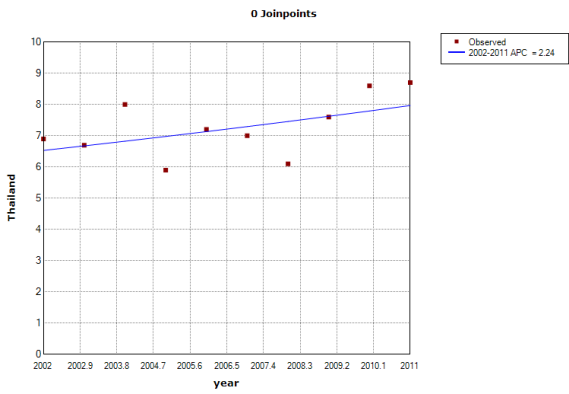

## Oceania

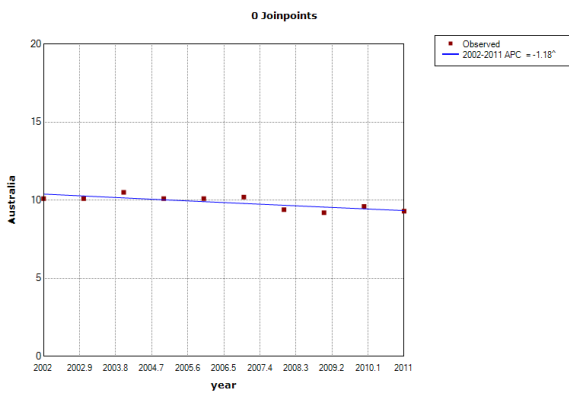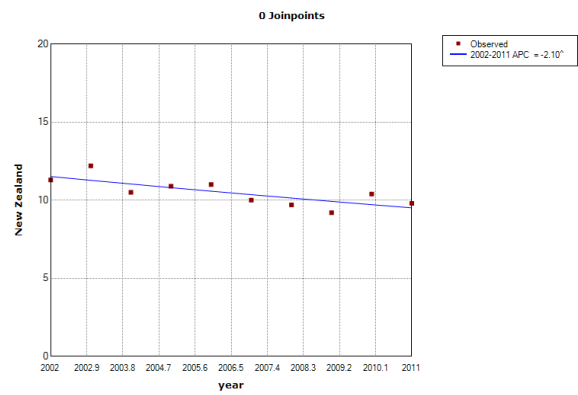

## Northern America

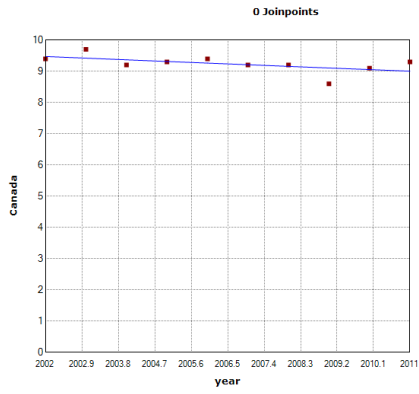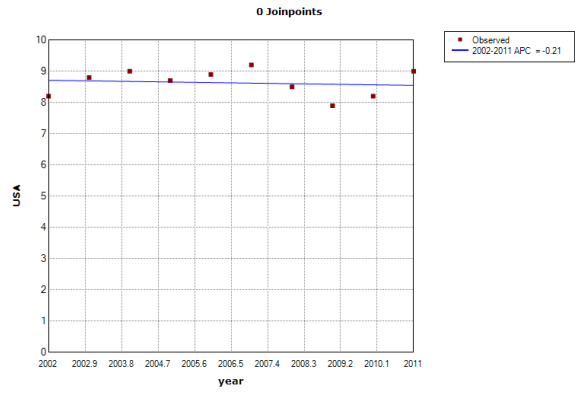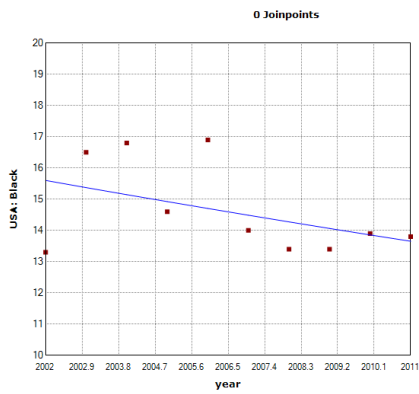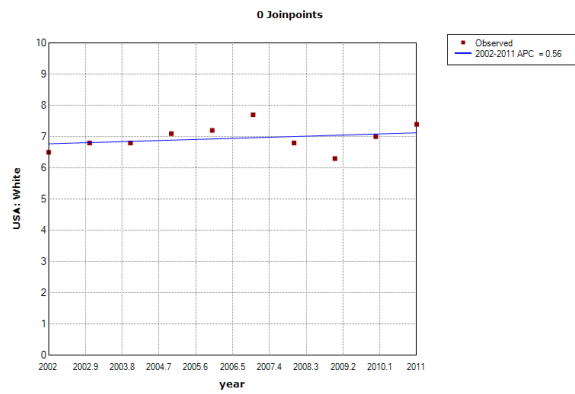

## Southern America

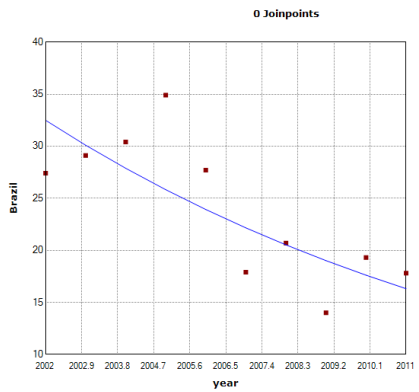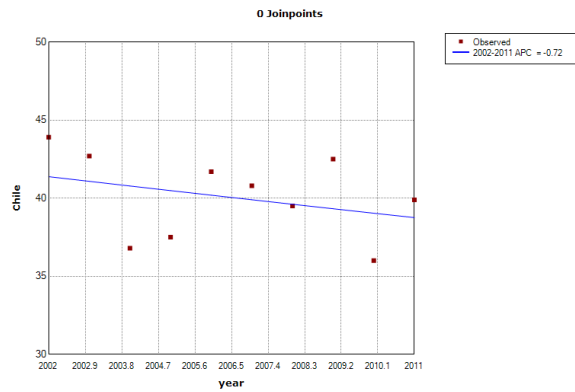

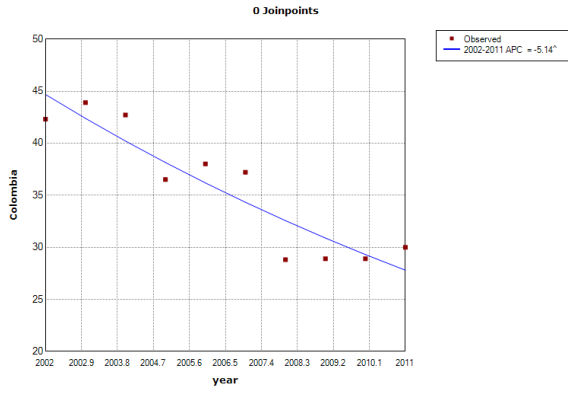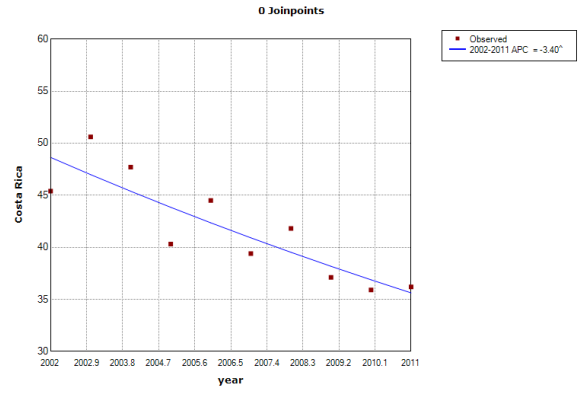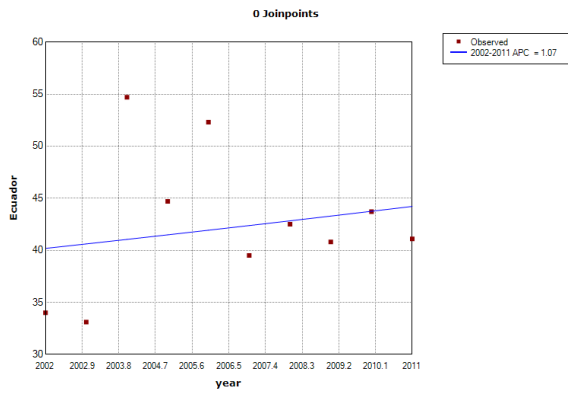

## Northern Europe

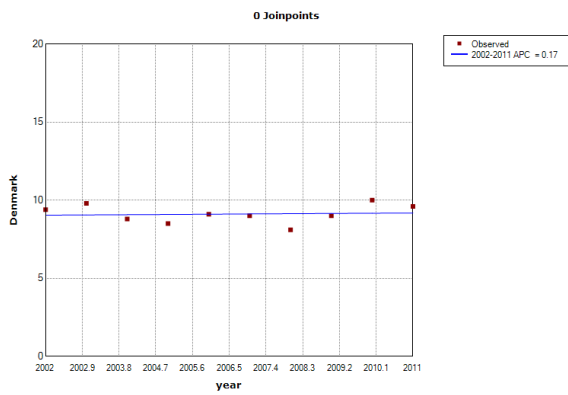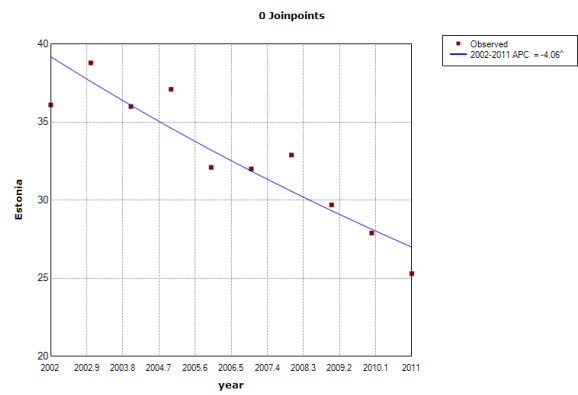

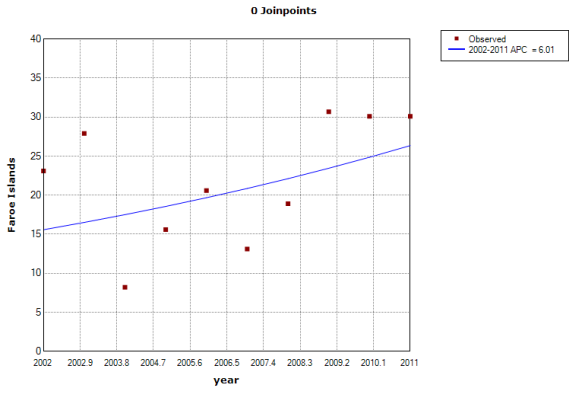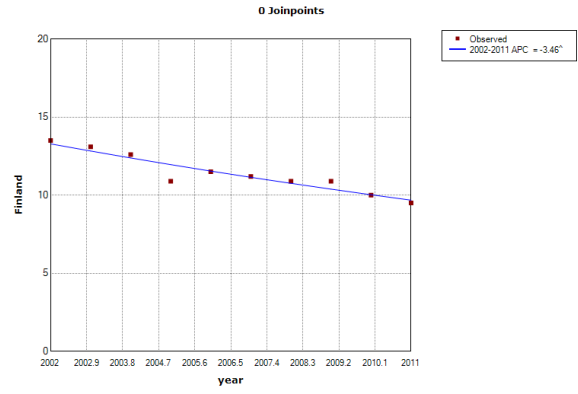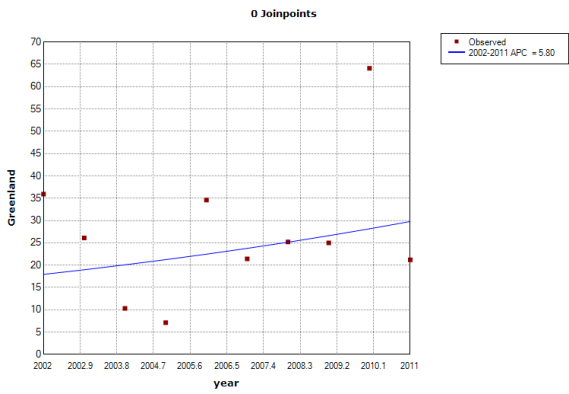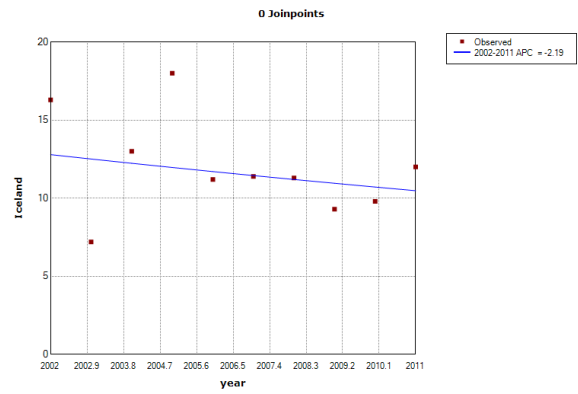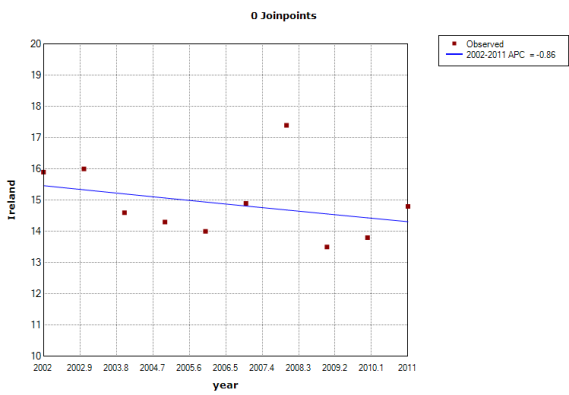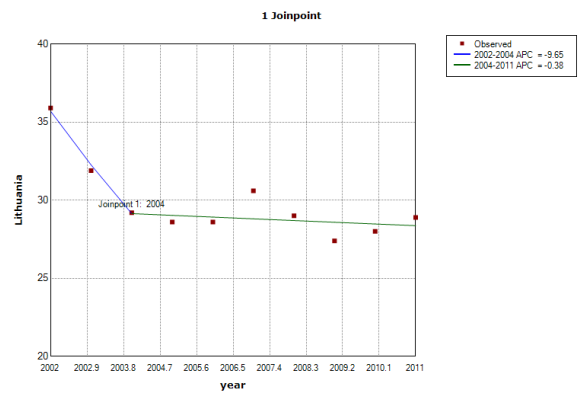

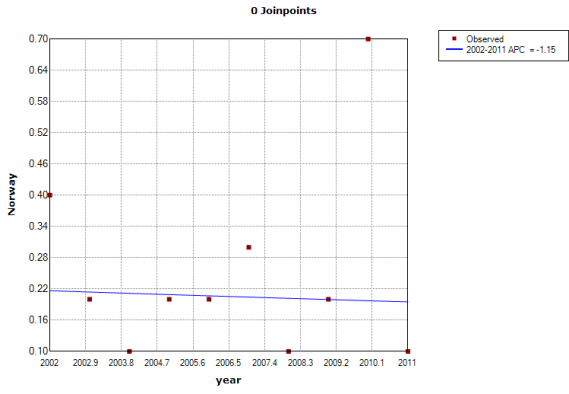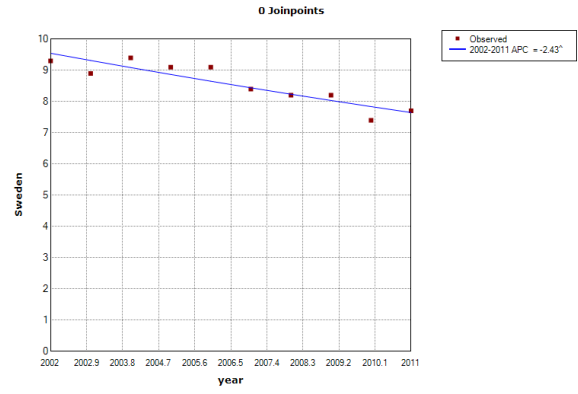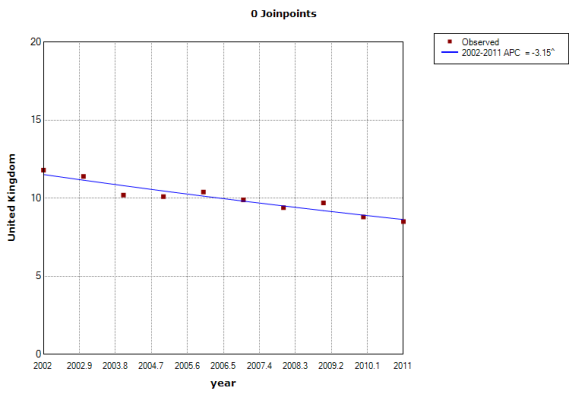

## Western Europe

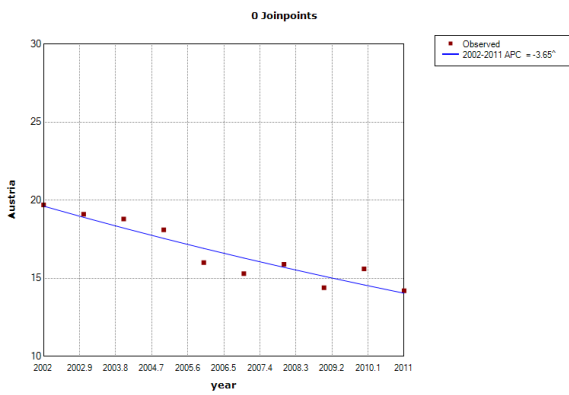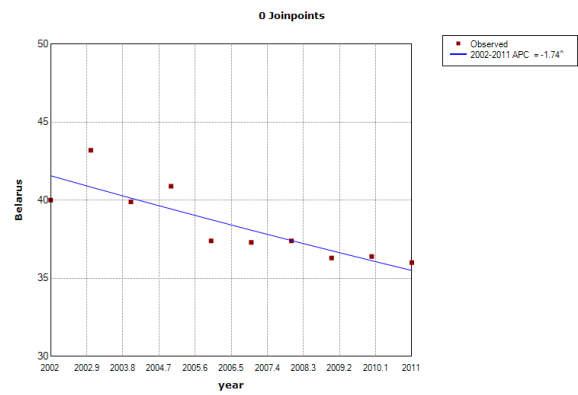

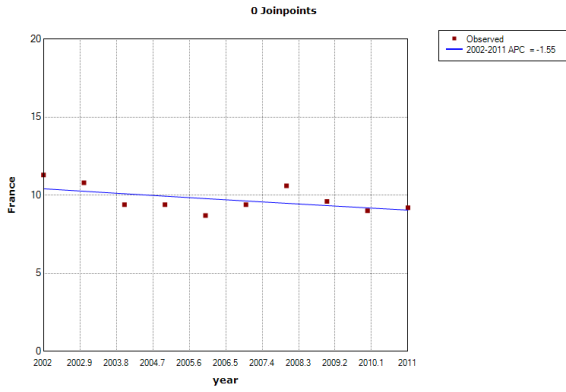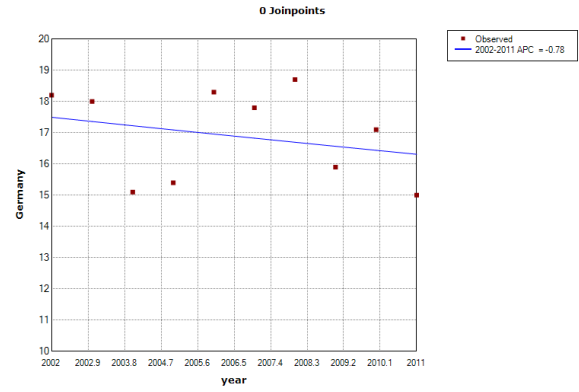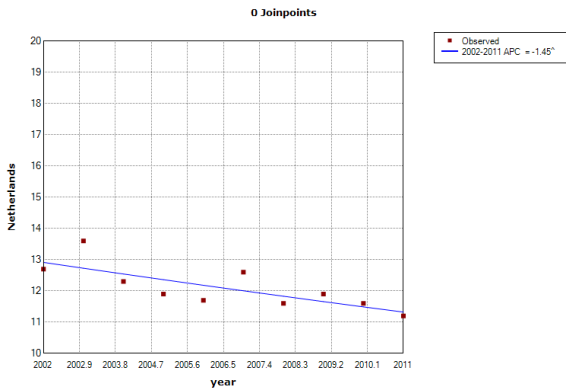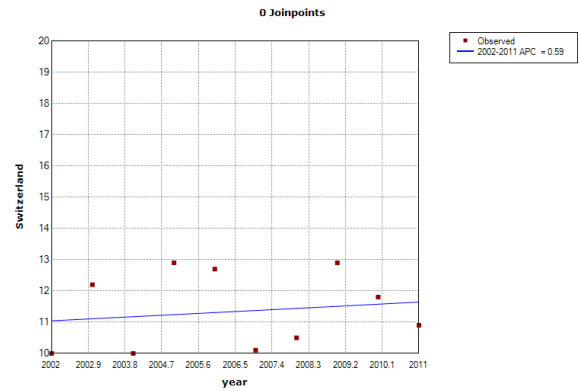

## Southern Europe

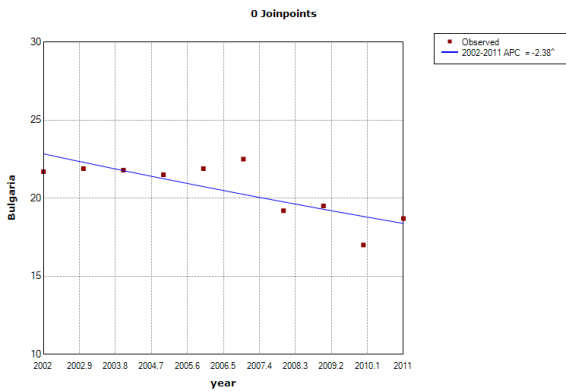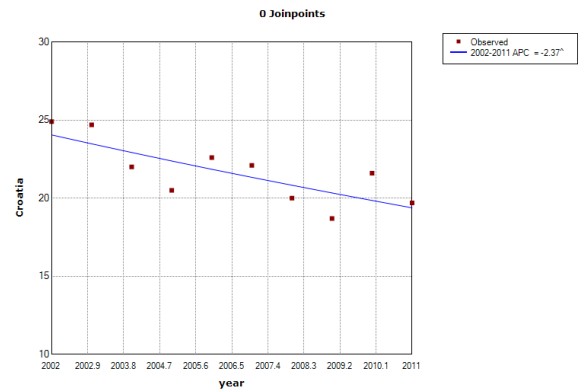

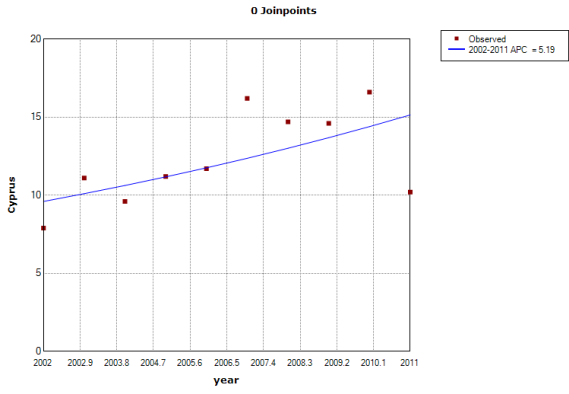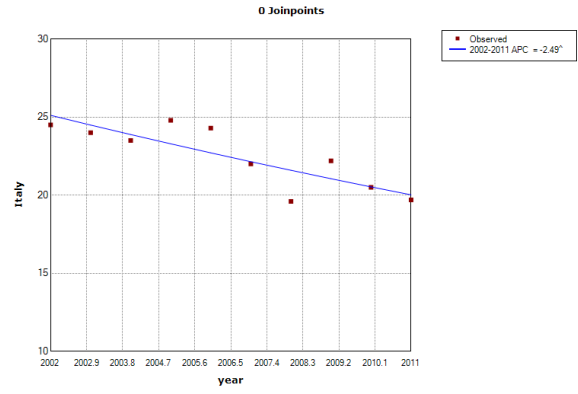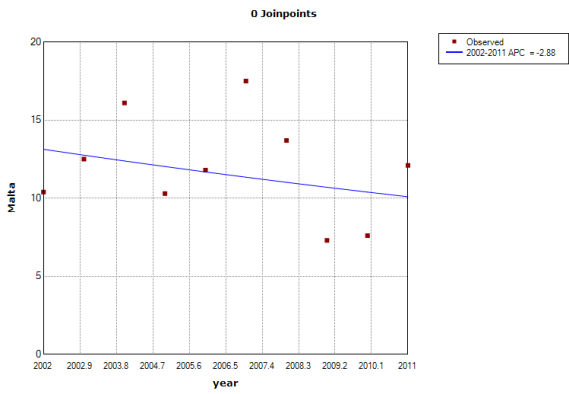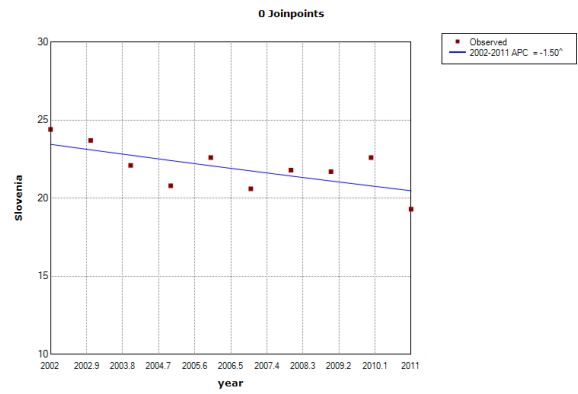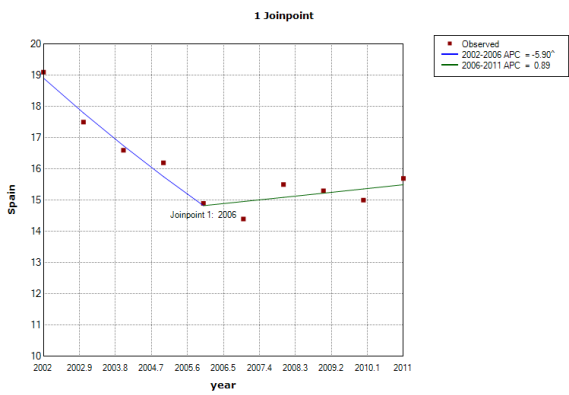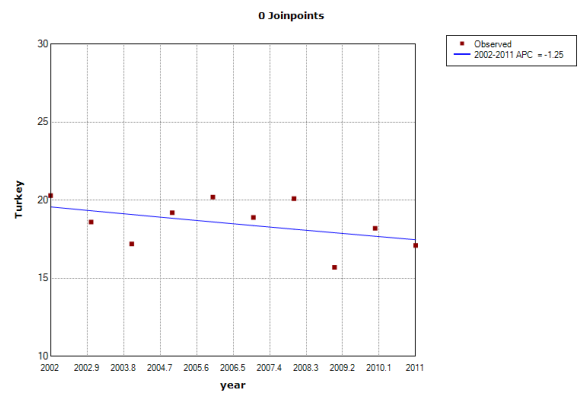



## Eastern Europe

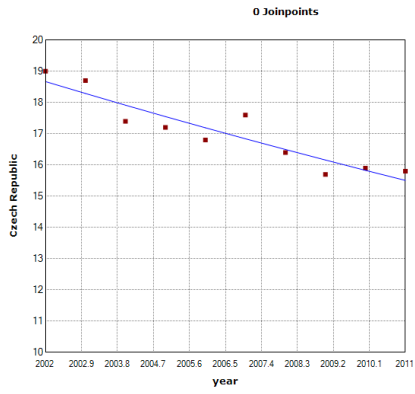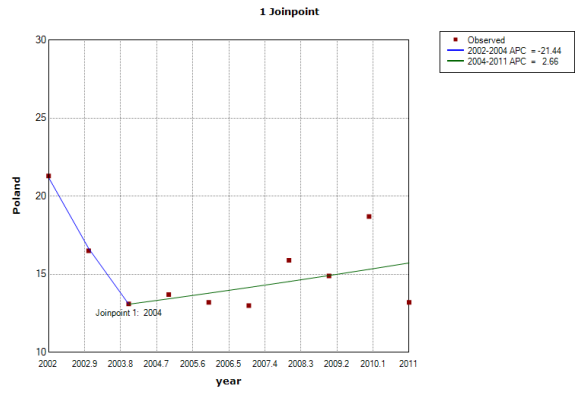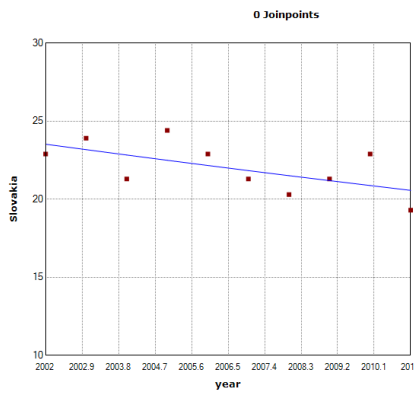

## Africa

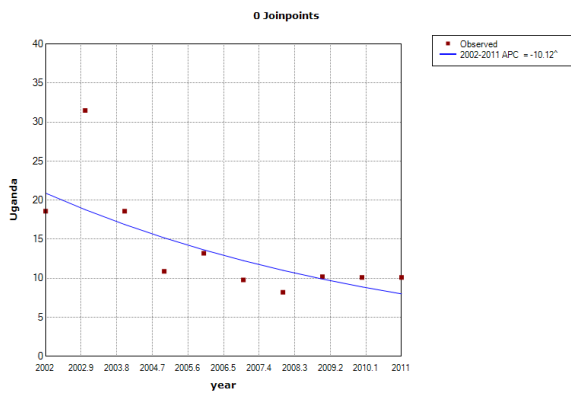

g.) Mortality male all ages

Asia

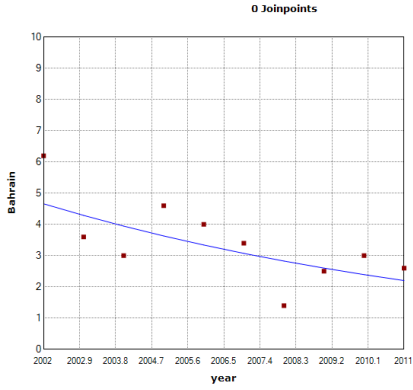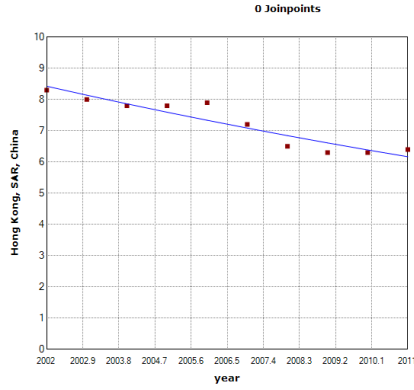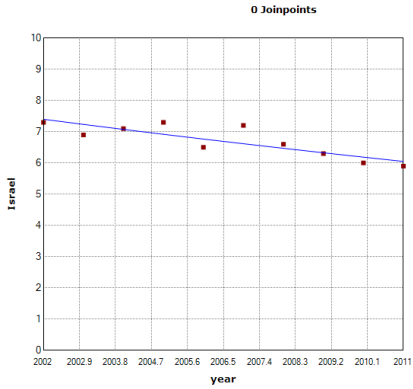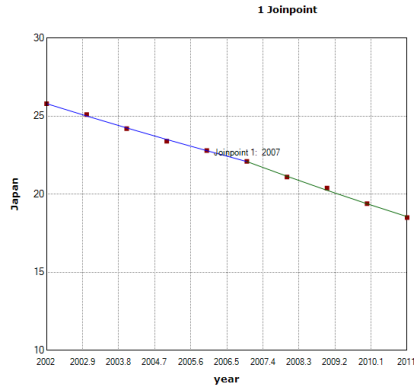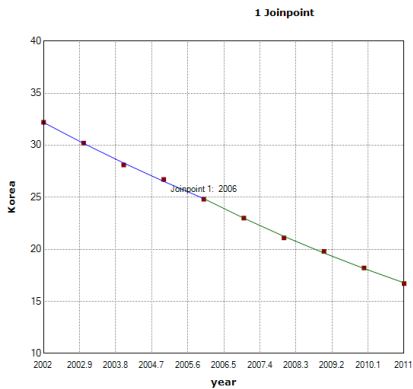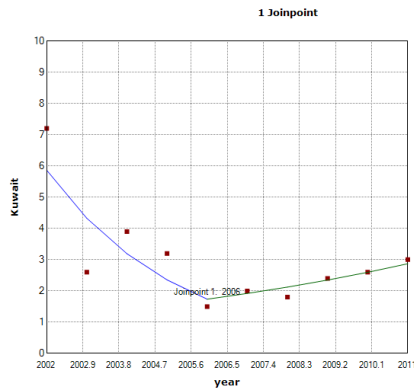

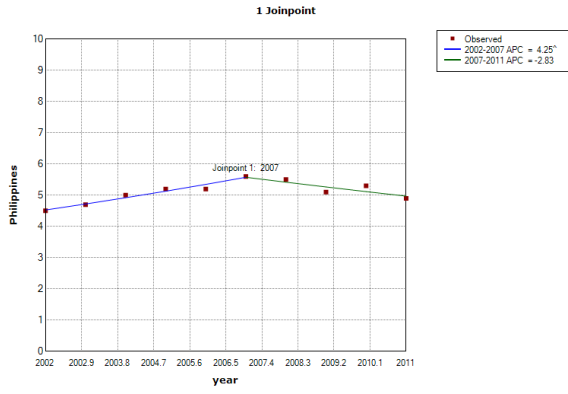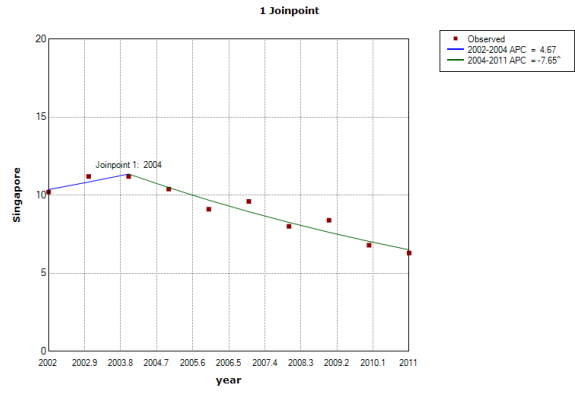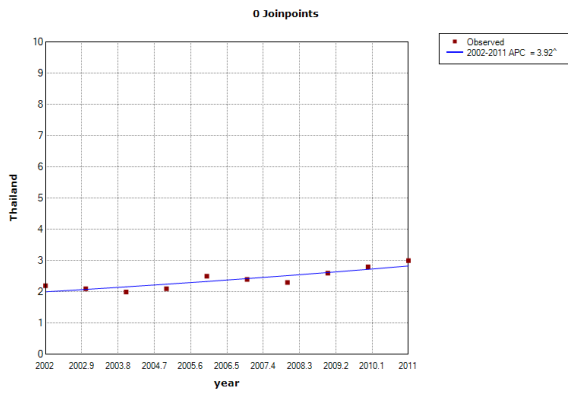

## Oceania

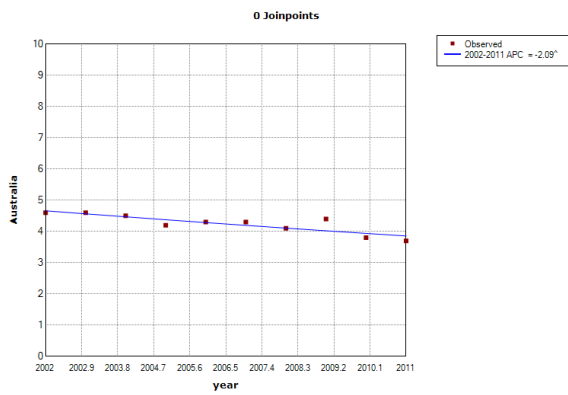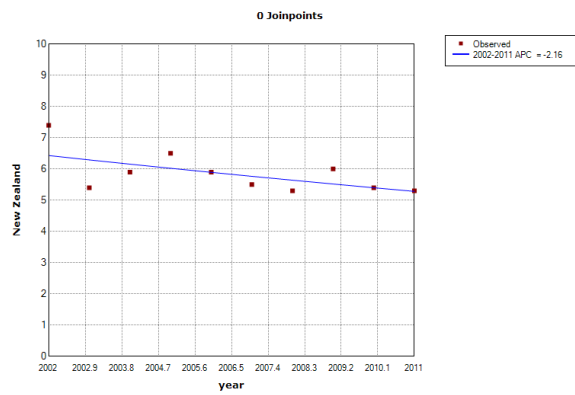

## Northern America

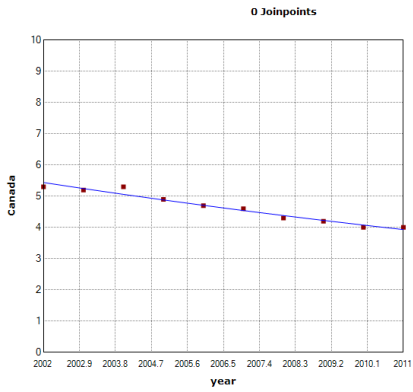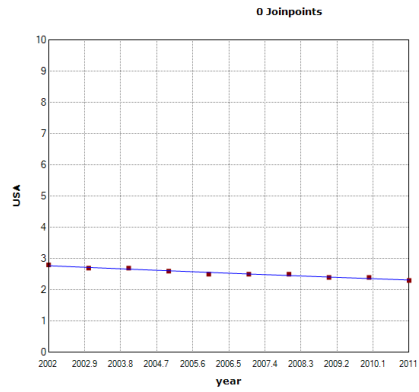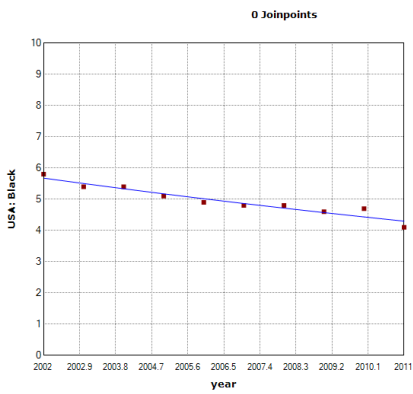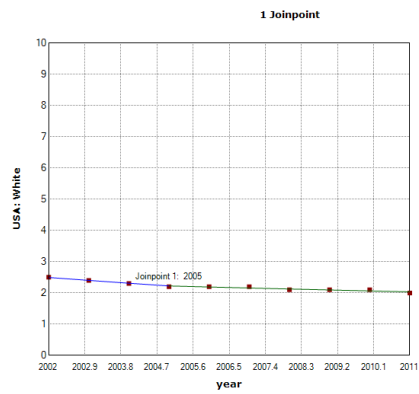

## Southern America

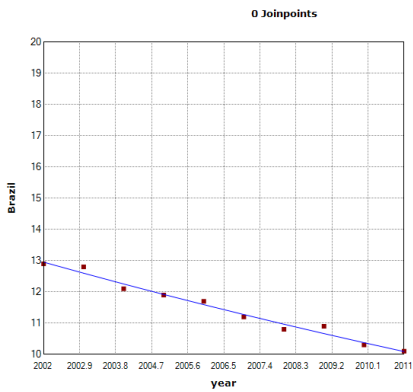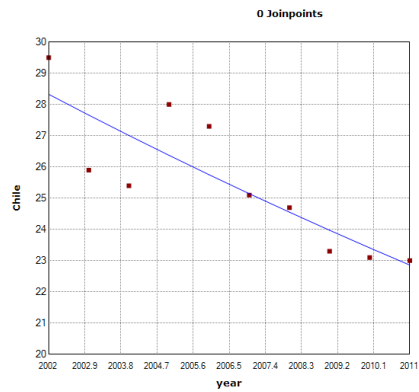

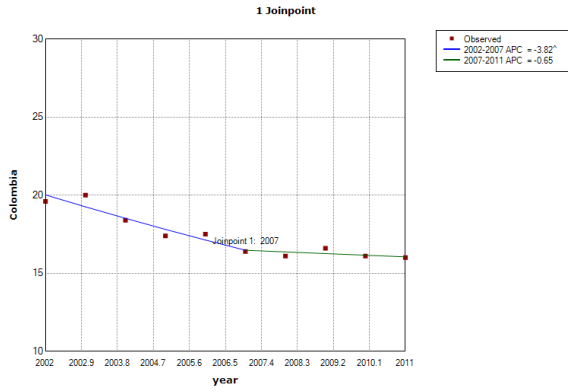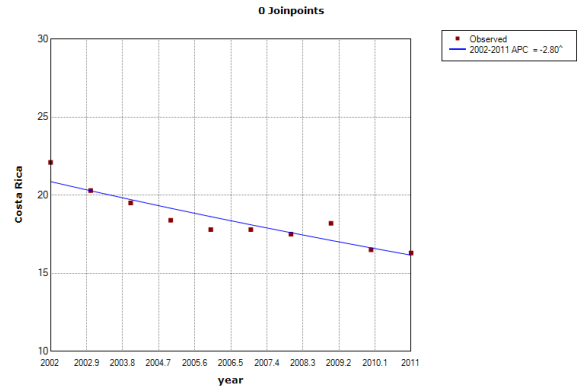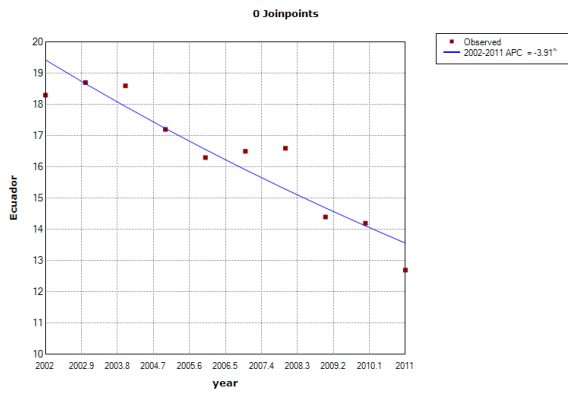

## Northern Europe

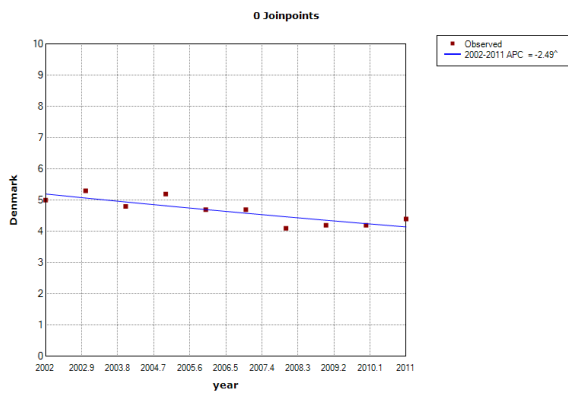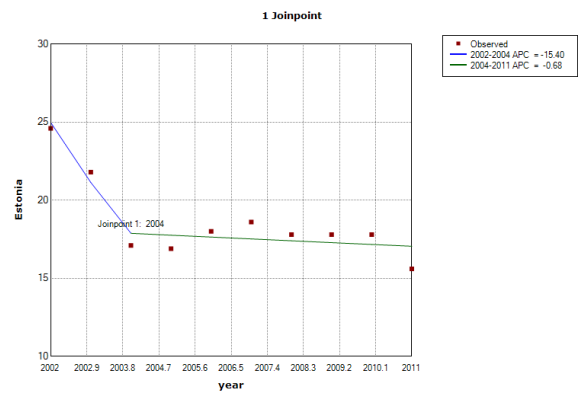

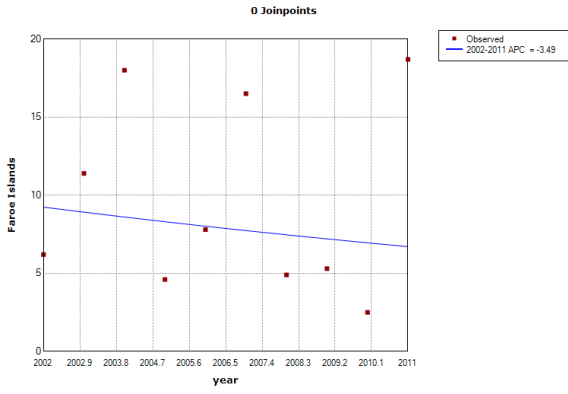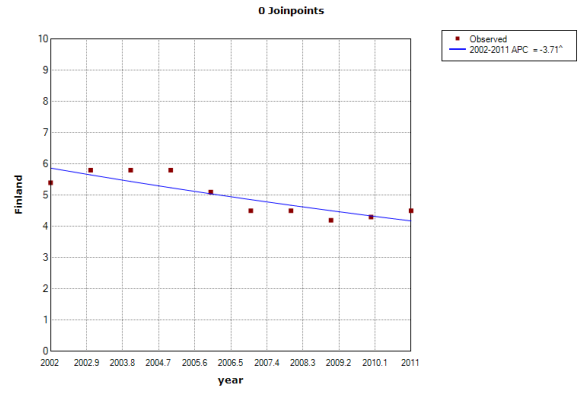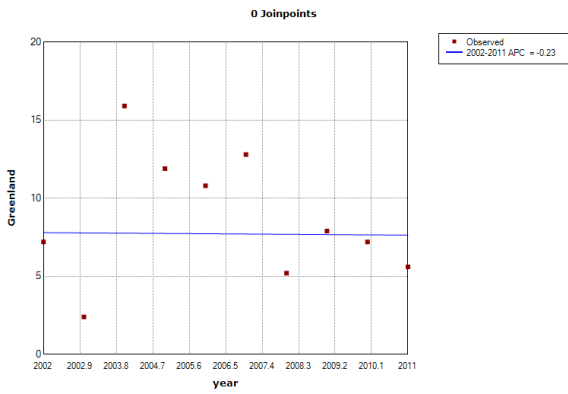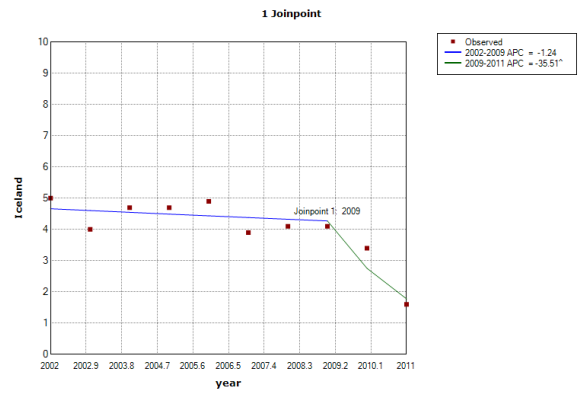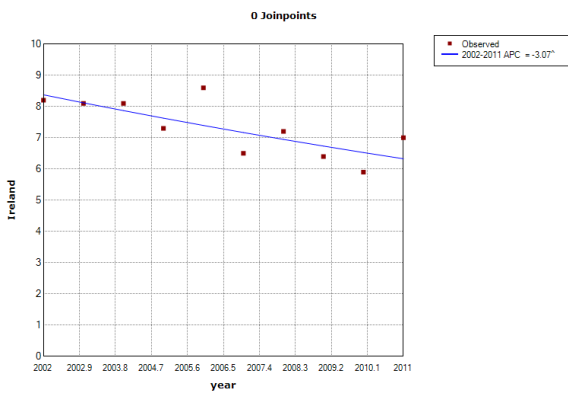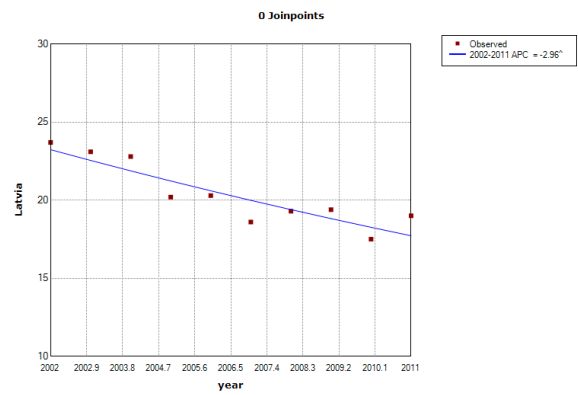

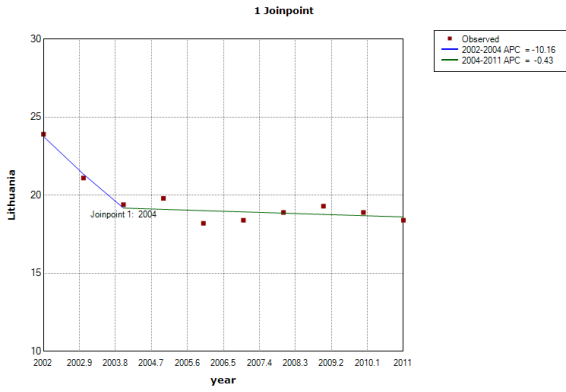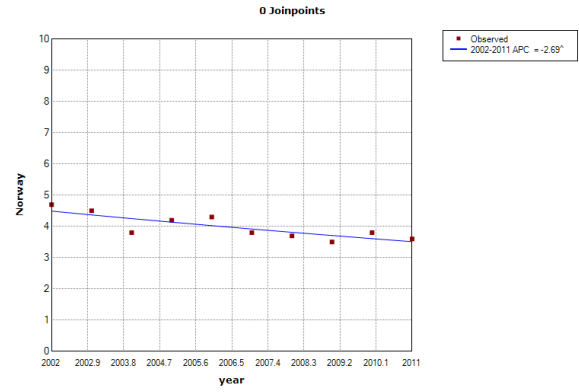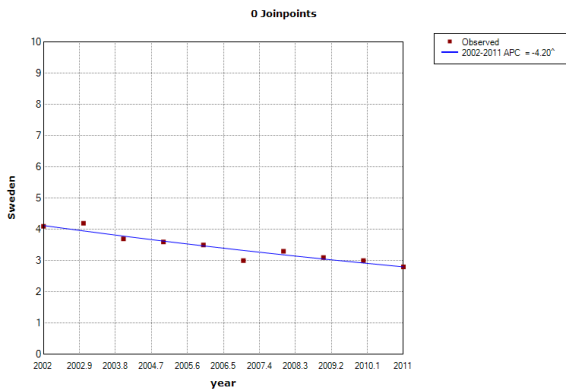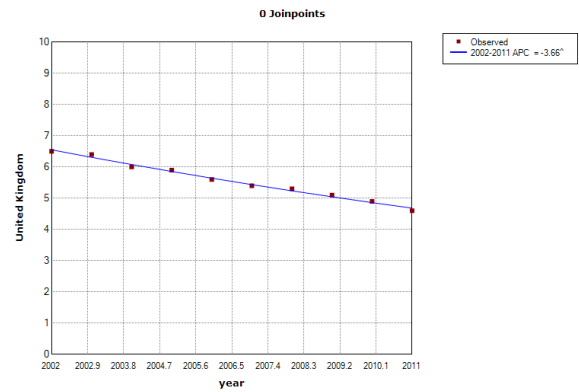

## Western Europe

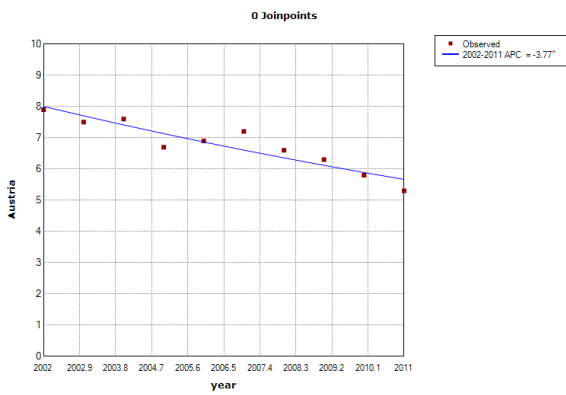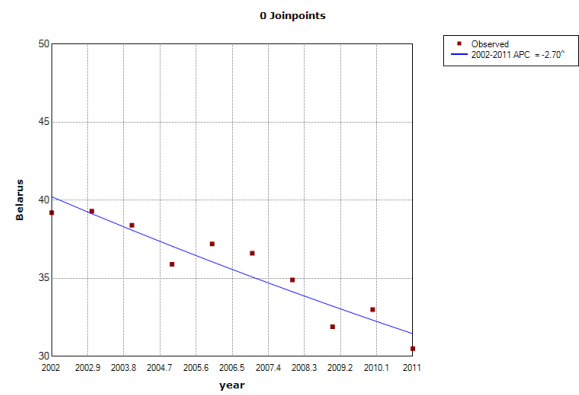

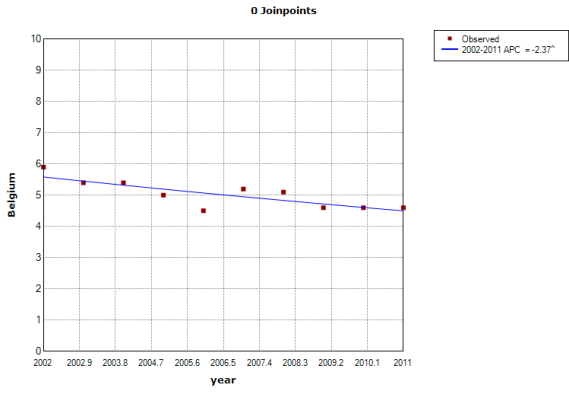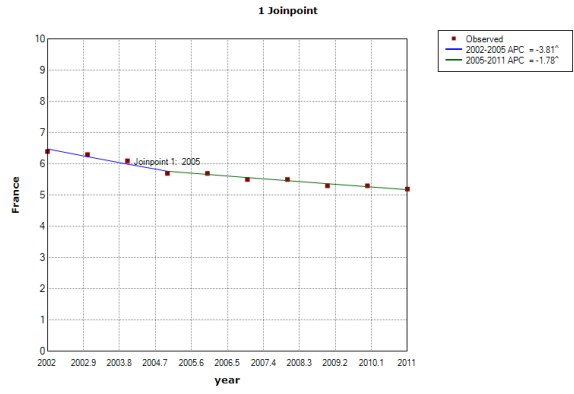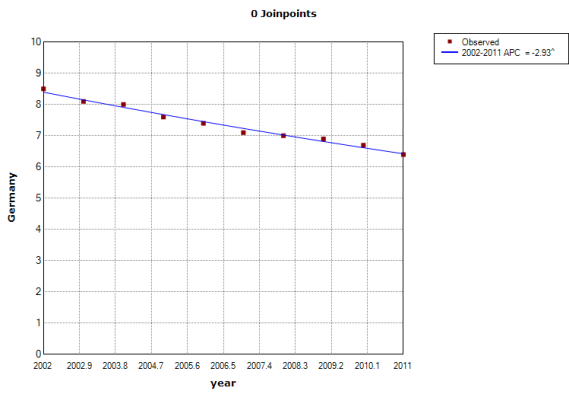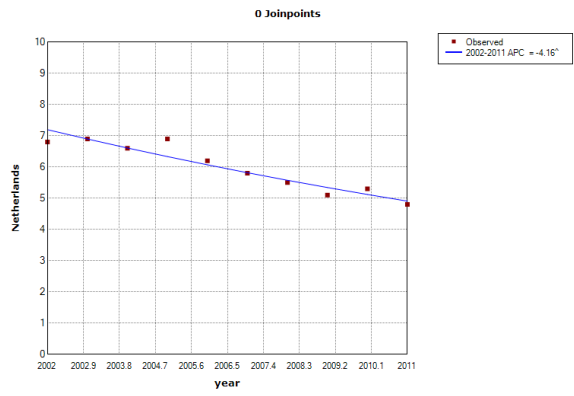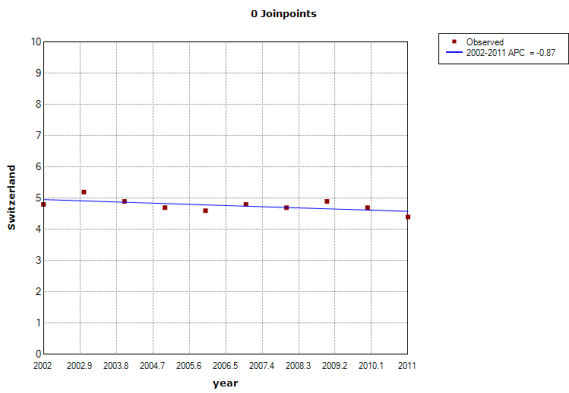



# Southern Europe

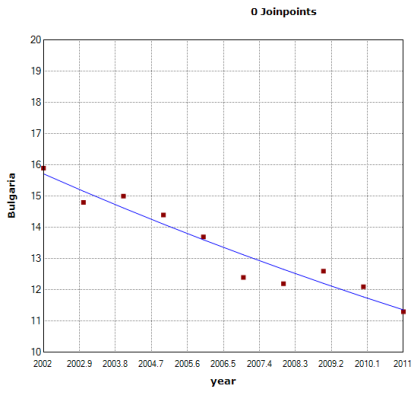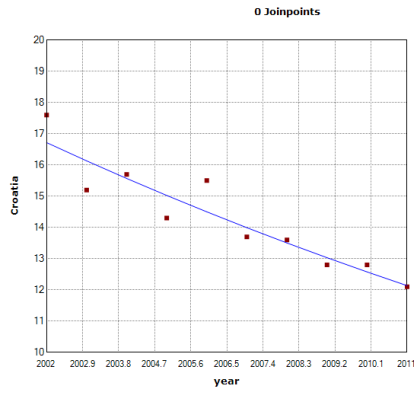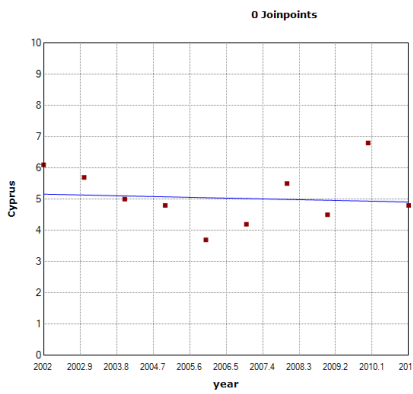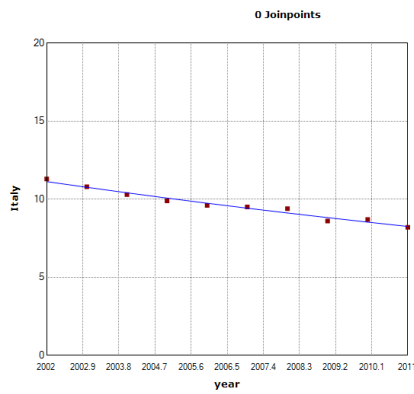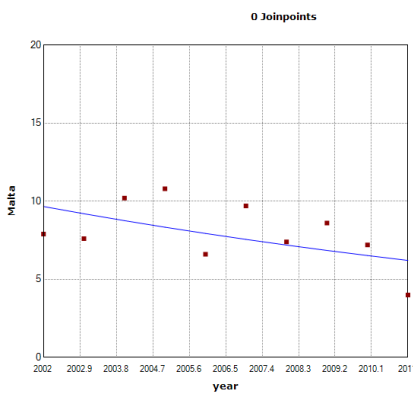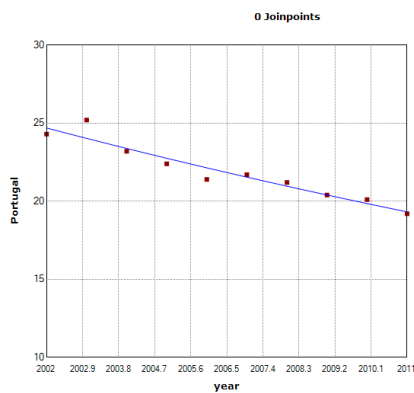

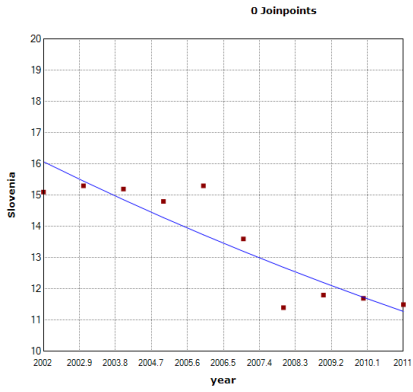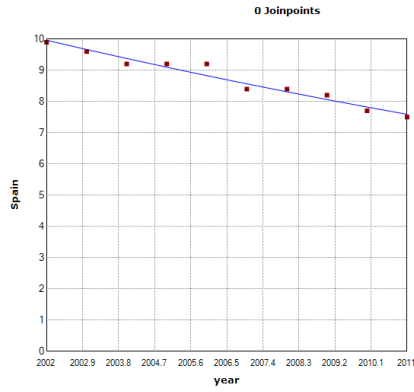

## Eastern Europe

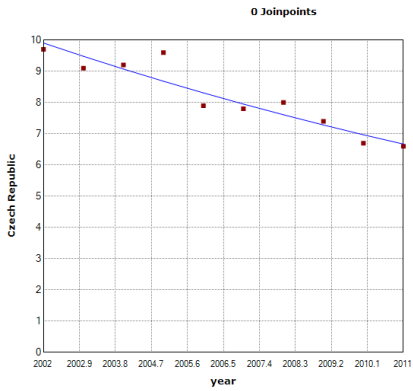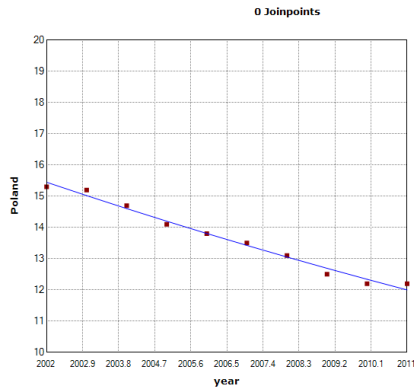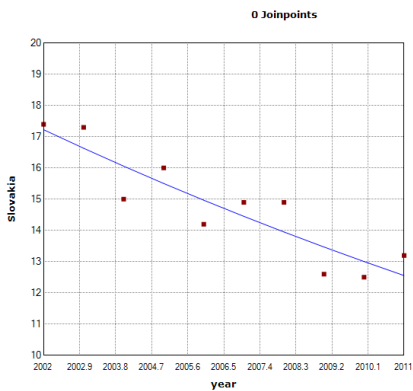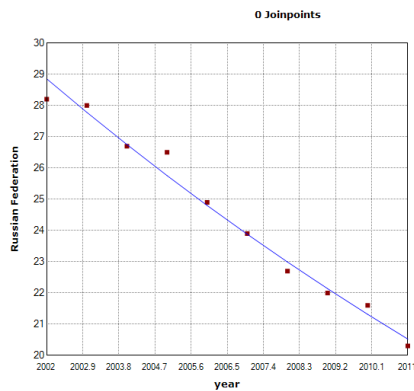

h.) Mortality female all ages

Asia

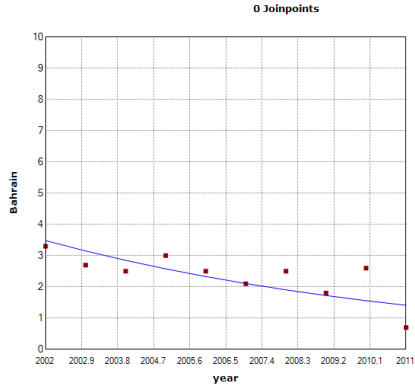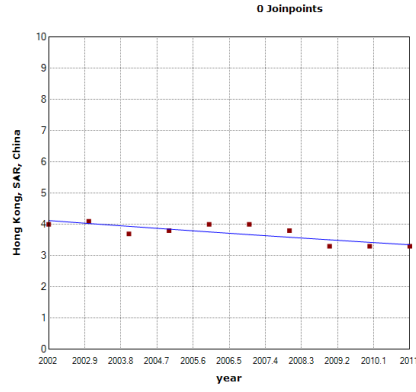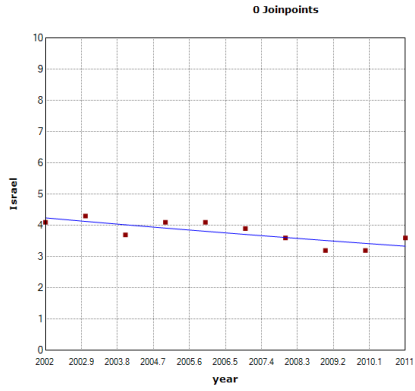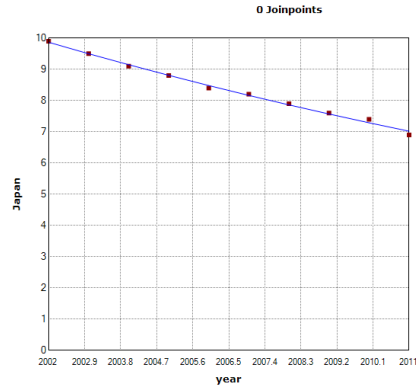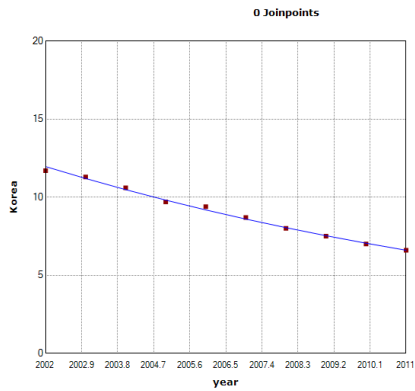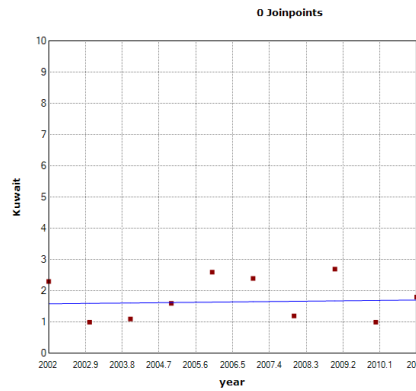

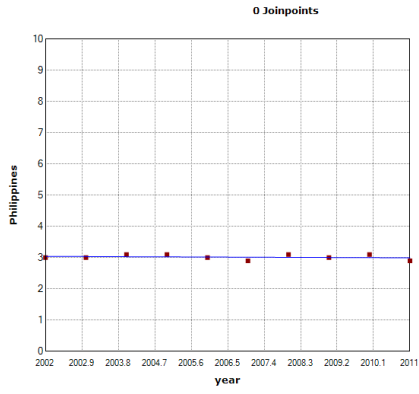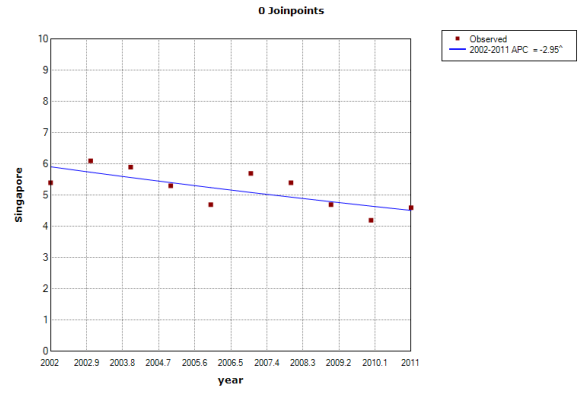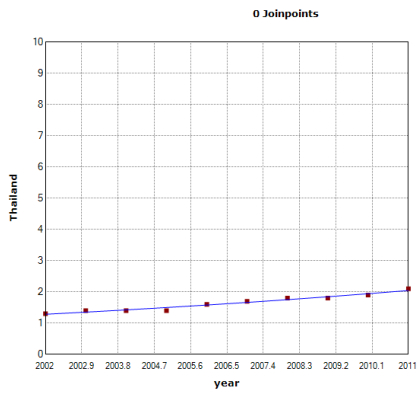

## Oceania

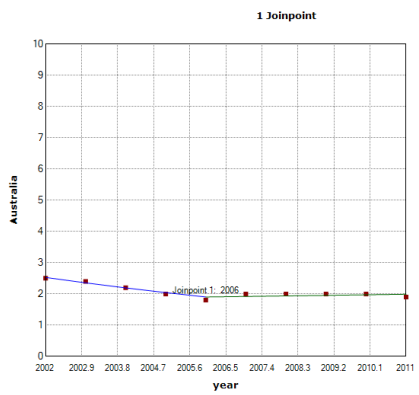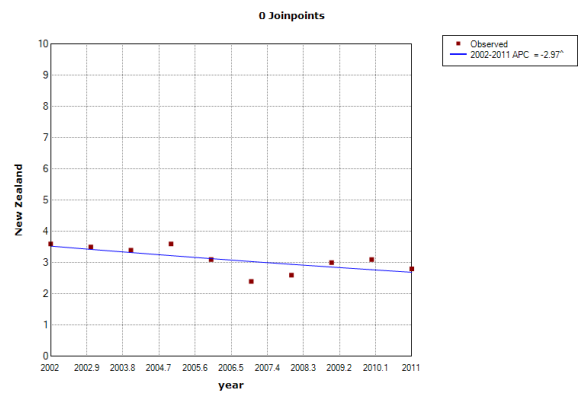

## Northern America

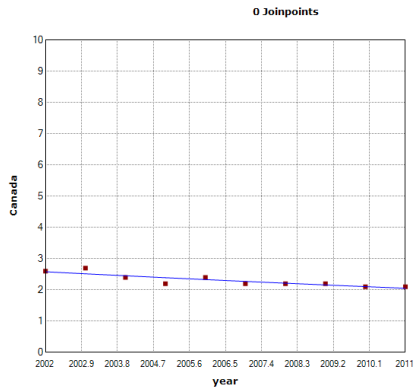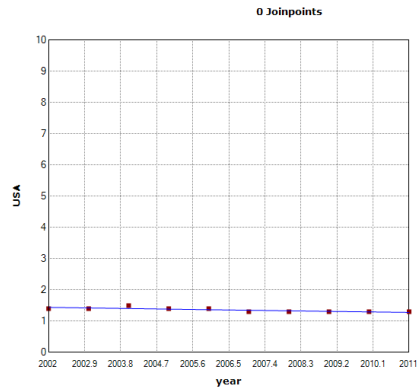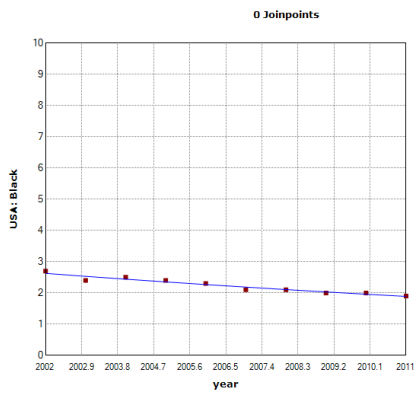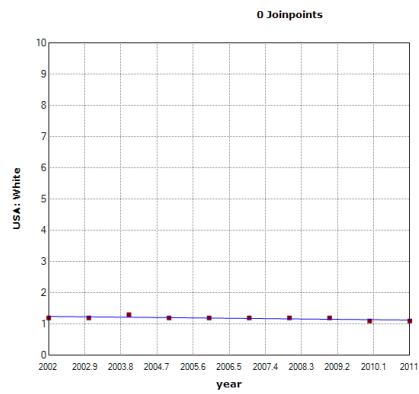

## Southern America

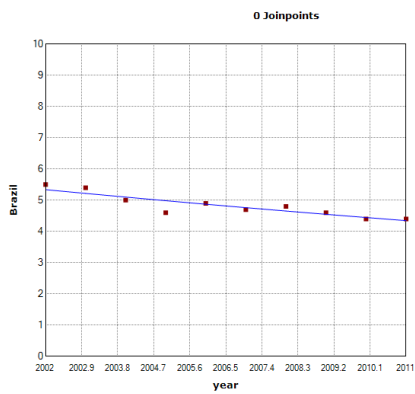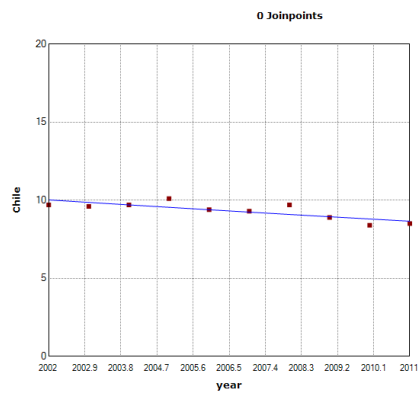

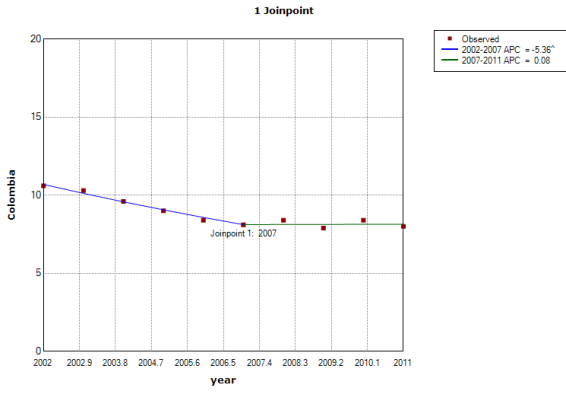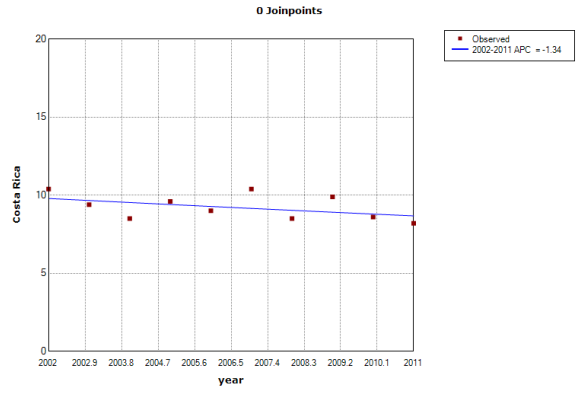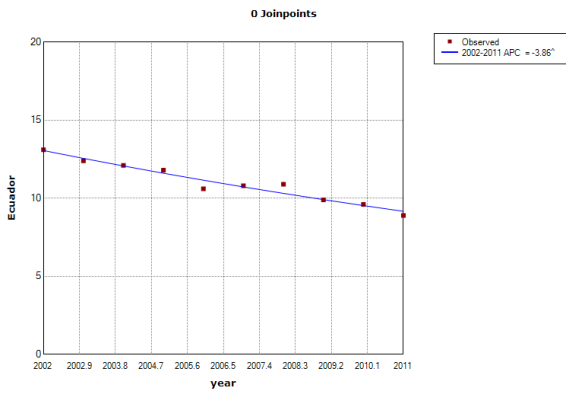

## Northern Europe

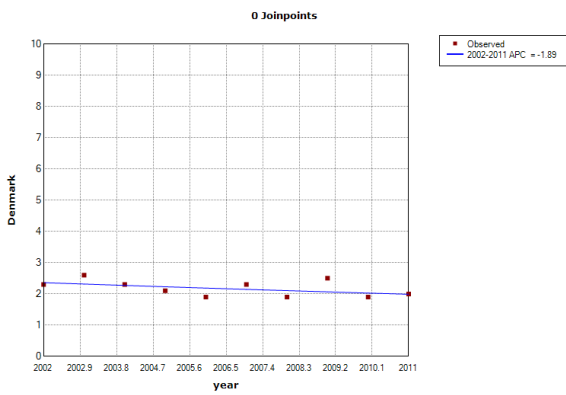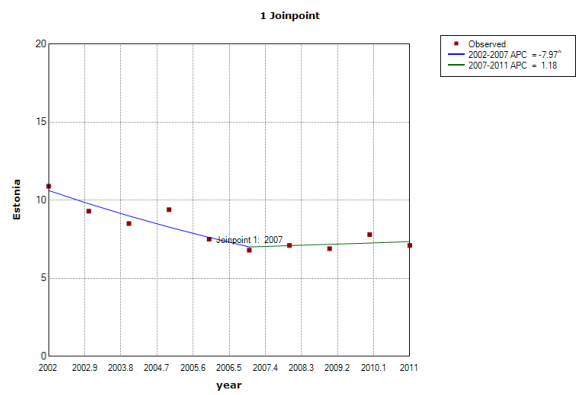

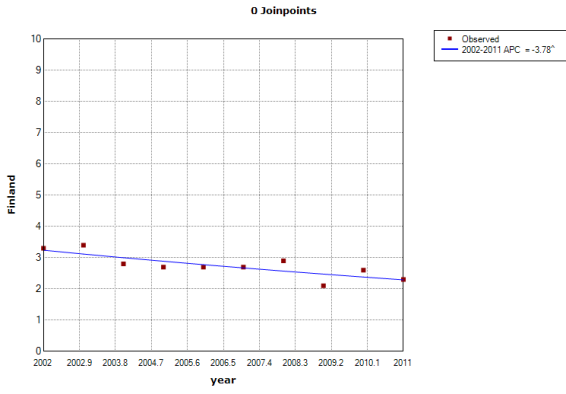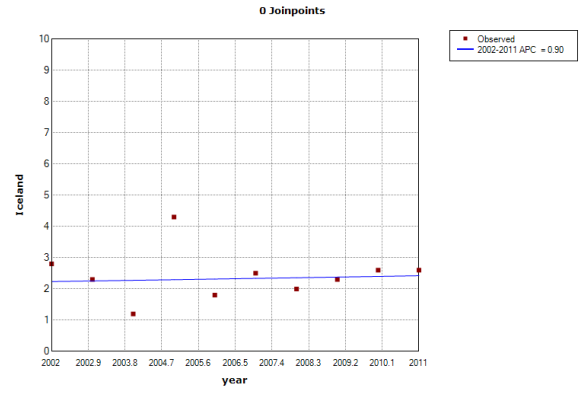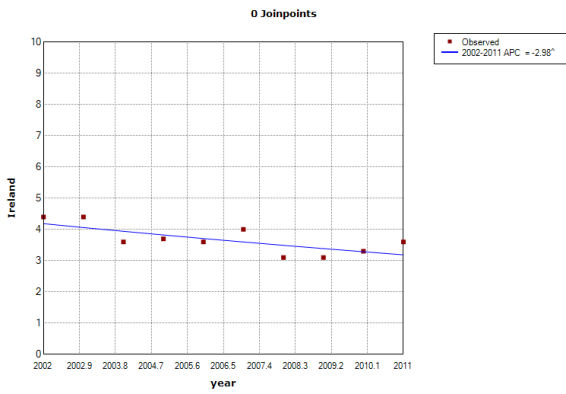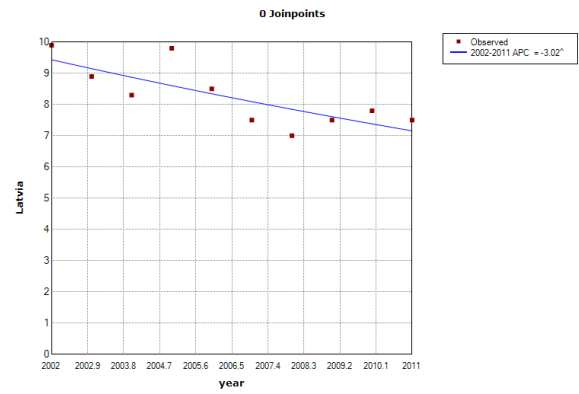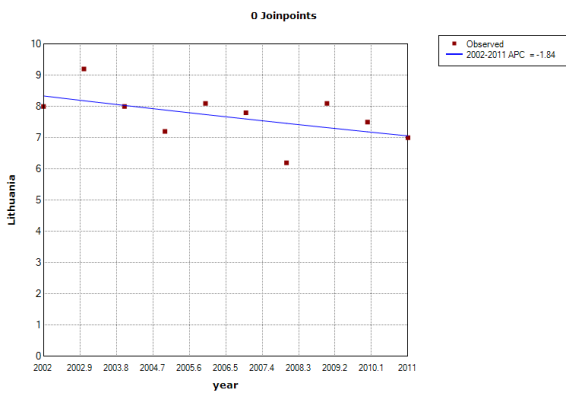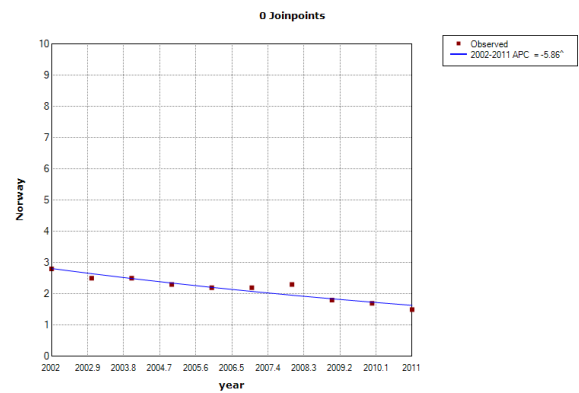

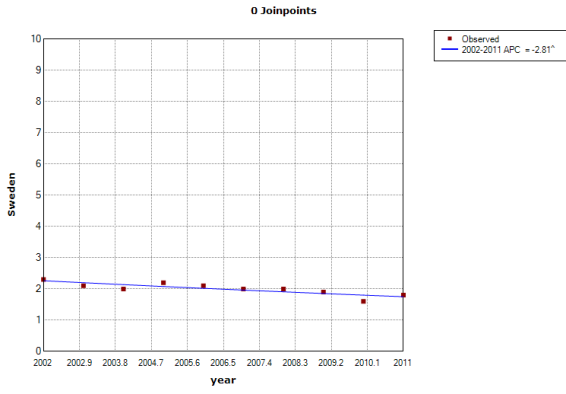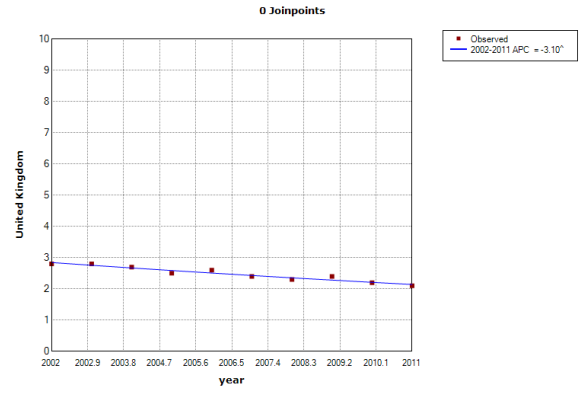

## Western Europe

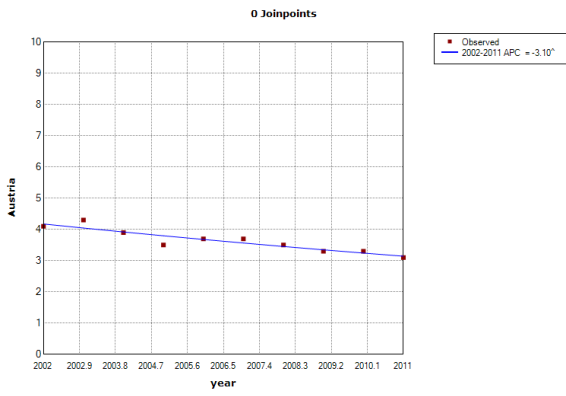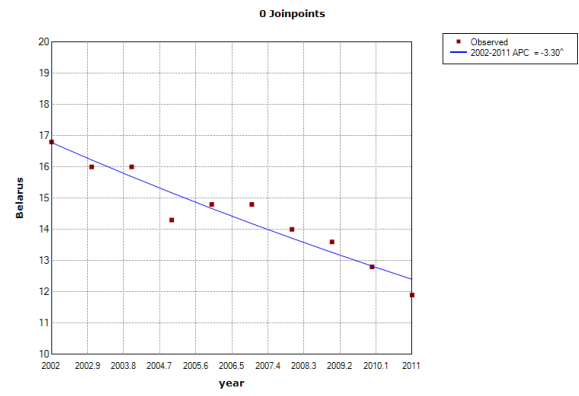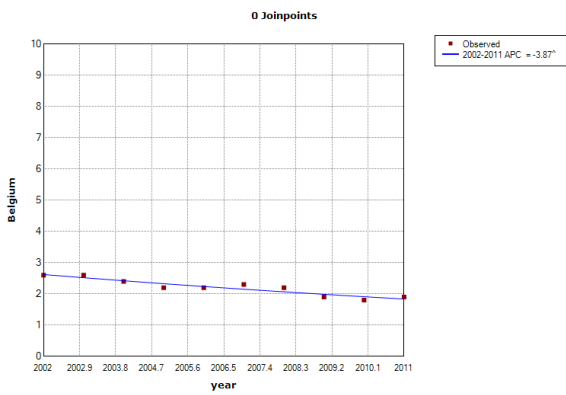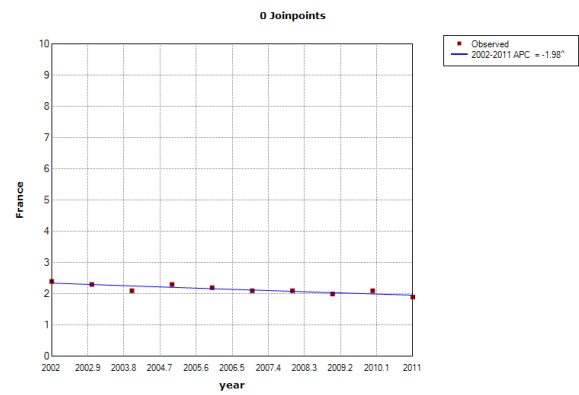



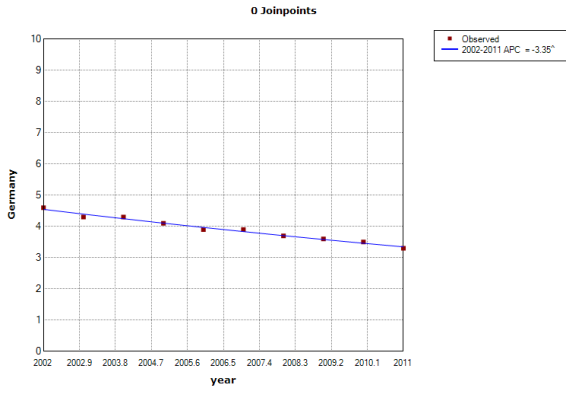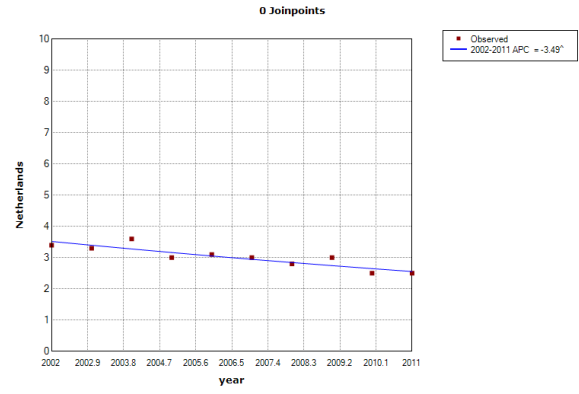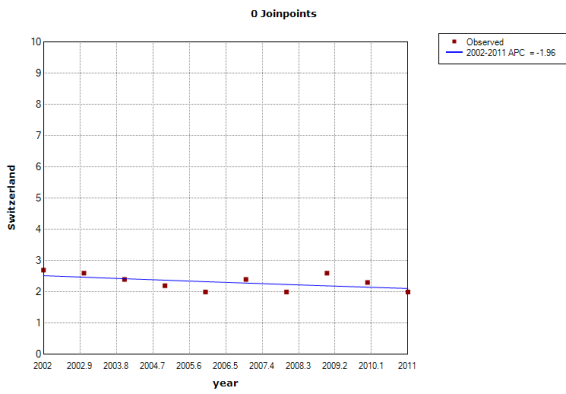

## Southern Europe

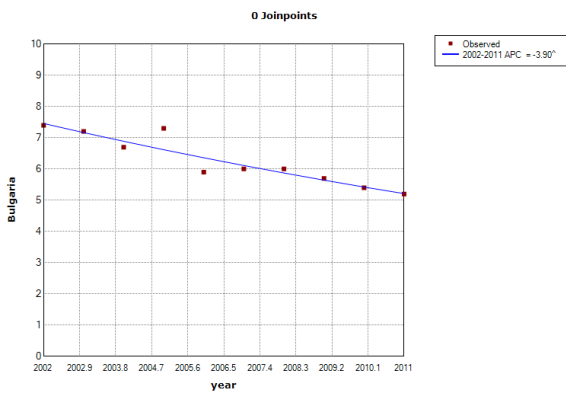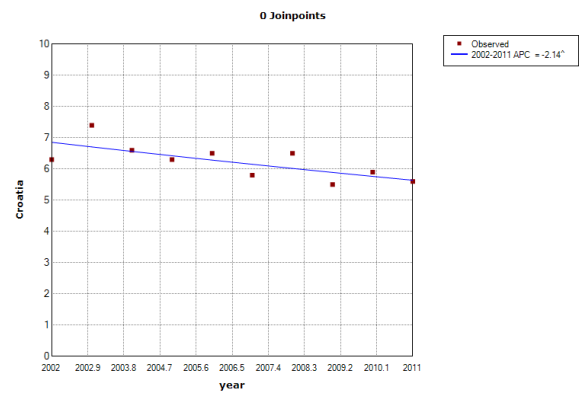

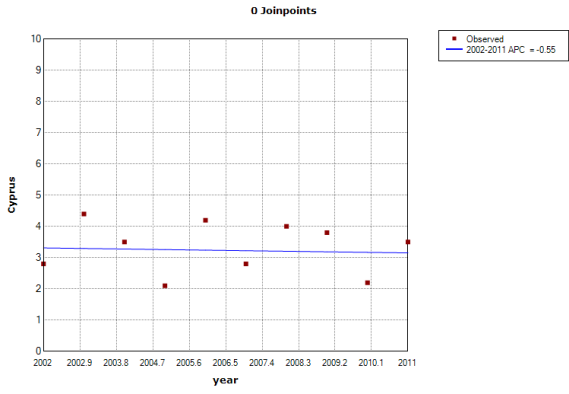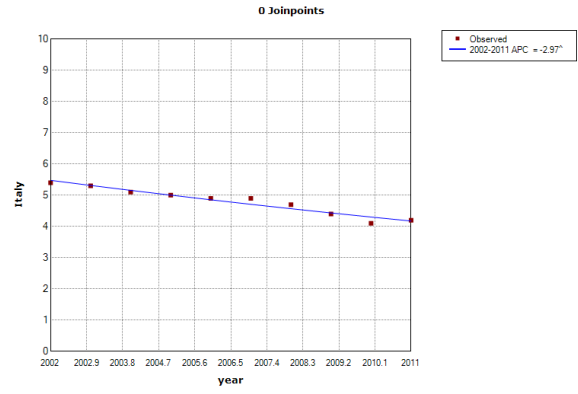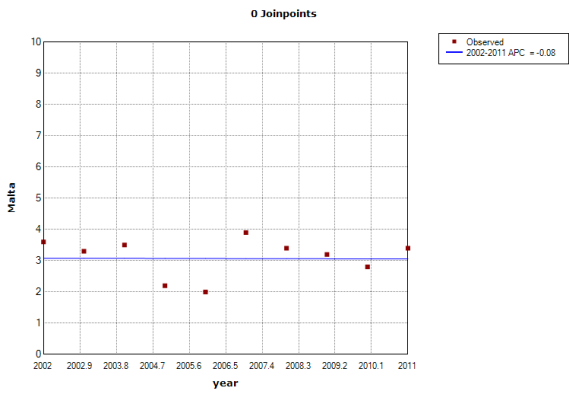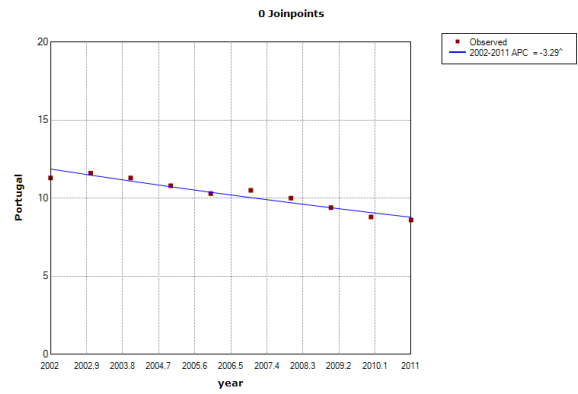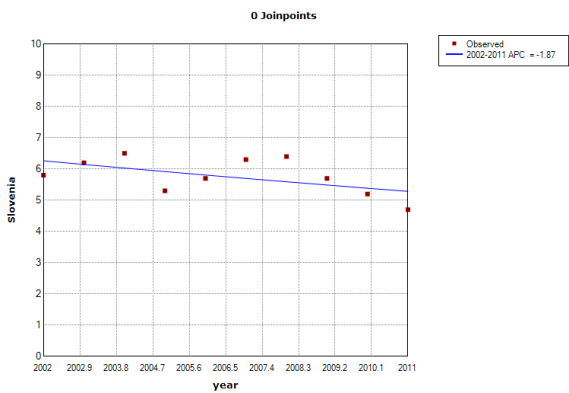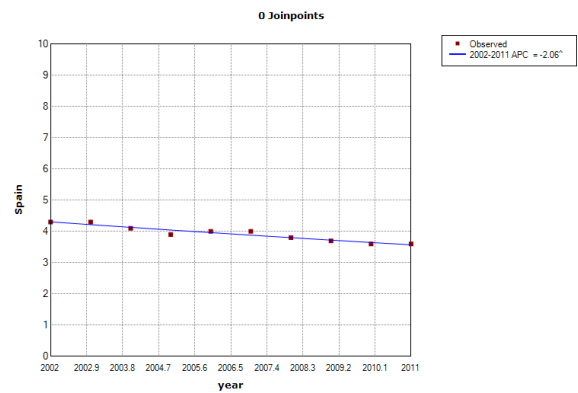

# Eastern Europe

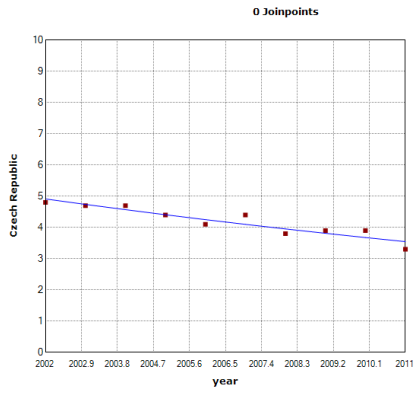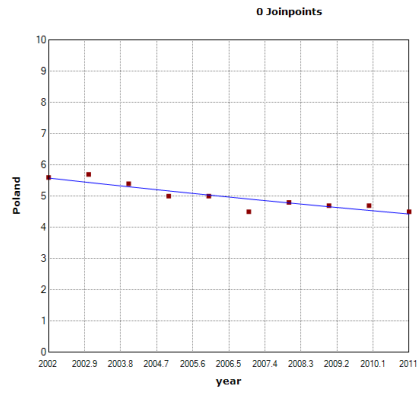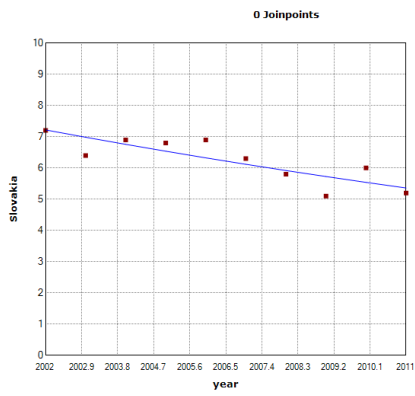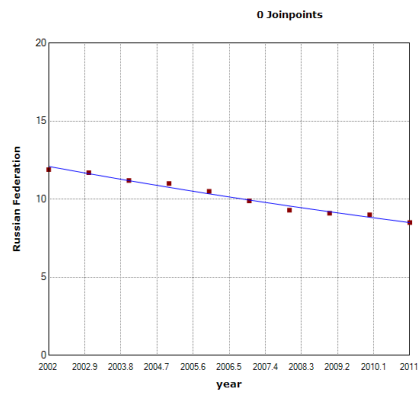

Supplement: jamanetwopen-e2118457-s001.pdf [file jamanetwopen-e2118457-s001.pdf]
